# Supplementary material
Source: PubMed Central journal article supplement (PMC6275524)
Supplement: pnas.1809028115.sapp.pdf [file pnas.1809028115.sapp.pdf]

# Supporting Information for

## Role of Humoral Immunity against Hepatitis B Virus Core Antigen in the Pathogenesis of Acute Liver Failure

Zhaochun Chen<sup>a</sup>, Giacomo Diaz<sup>b</sup>, Teresa Pollicino<sup>a,c</sup>, Huaying Zhao<sup>d</sup>, Ronald E. Engle<sup>a</sup>, Peter W. Schuck<sup>d</sup>, Chen-Hsiang Shen<sup>e</sup>, Fausto Zamboni<sup>f</sup>, Zhifeng Long<sup>g</sup>, Juraj Kabat<sup>h</sup>, Davide De Battista<sup>a</sup>, Kevin W. Bock<sup>i</sup>, Ian N. Moore<sup>i</sup>, Kurt Wollenberg<sup>j</sup>, Cinque Soto<sup>e</sup>, Sugantha Govindarajan<sup>k</sup>, Peter D. Kwong<sup>e</sup>, David E. Kleiner<sup>l</sup>, Robert H. Purcell<sup>a\*</sup>, Patrizia Farci<sup>a\*</sup>

**Co-corresponding authors.** Email : [pfarci@niaid.nih.gov](mailto:pfarci@niaid.nih.gov), [roberthpurcell@gmail.com](mailto:roberthpurcell@gmail.com)

### The PDF file includes:

#### Materials and Methods

Fig. S1. Study design.

Fig. S2. Standard linear dose-response curves for recombinant HBcAg derived from ayw, 31 and 241 respectively, and kinetics of HBcAg expression *in vitro*.

Fig. S3. Intracellular localization of hepatitis B surface antigen (HBsAg) and hepatitis B core antigen (HBcAg) in HepG2 cells analyzed by confocal microscopy. High magnification.

Fig. S4. Intracellular localization of hepatitis B surface antigen (HBsAg) and hepatitis B core antigen (HBcAg) in HepG2 cells analyzed by confocal microscopy.

Fig. S5. Intracellular localization of hepatitis B surface antigen (HBsAg) and hepatitis B core antigen (HBcAg) in HepG2 cells analyzed by confocal microscopy. Low magnification.

Fig. S6. Heatmap of genes differentially expressed between patients with acute liver failure and controls.

Fig. S7. Heatmap of microRNA differentially expressed between patients with acute liver failure and controls.

Fig. S8. Major disease categories significantly associated with mRNAs and miRNAs that were differentially expressed in patients with acute liver failure.

Fig. S9. Immunohistochemical staining of B-cell and T-cell lineage in liver tissue of a representative patient with massive hepatic necrosis at the time of liver transplantation, and of a representative liver donor.

Fig. S10. Immunohistochemical staining for naïve B cells in liver tissue of a representative patient with massive hepatic necrosis at the time of liver transplantation.

Fig. S11. Virologic and histopathologic course of acute hepatitis B in a chimpanzee infected with HBV.

Fig. S12. Immunohistochemical staining of complement C1q in 4 patients with acute liver failure and in a representative control liver donor.

Fig. S13. Intrahepatic detection of HBsAg and HBcAg in two chimpanzees with acute, self-limited hepatitis B and timing of phage display library generation in the same chimpanzees.

Fig. S14. Distribution of IgH V gene usage in the intrahepatic IgG and IgM repertoires of healthy liver donor (patient 37) and four patients with HBV-associated ALF (patient 241, 31, 219 and 32).

Fig. S15. Representative sensograms showing binding of monoclonal antibodies from a patient with HBV-associated acute liver failure (Fab G3; top panels) and from a chimpanzee with acute hepatitis B (Fab F8; bottom panels) to various HBcAg proteins immobilized on different sensor surfaces.

Table S1. Virologic features in four patients with HBV-associated acute liver failure.

Table S2. Representative anti-HBc IgG and IgM titers in four patients with classic acute HBV infection.

Table S3. Demographic, clinical and pathological data of liver donors and subjects undergoing liver resection for hepatic hemangioma.

Table S4. Synonymous and nonsynonymous mutations in the entire HBV genome in each of the four patients with acute liver failure.

Table S5. Sequence alignments of HBcAg in patients with acute liver failure and acute hepatitis B, compared to the wild-type reference HBV strain (ayw V01460).

Table S6. Reactivity of various anti-core antibodies against core derived from HBV wild-type (ayw) or from patients 241 and 31 with acute liver failure.

Table S7. List of 1351 differentially expressed genes in HBV-associated acute liver failure with absolute fold change higher than 3, listed in alphabetical order.

Table S8. List of 111 miRNAs differentially expressed in patients with HBV-associated acute liver failure.

Table S9. Major microRNAs involved in B-cell development, regulation and response, their potential targets and the differential expression in livers of patients with HBV-associated acute liver failure, compared to normal livers.

Table S10. Results of phage-display library screening for antigen-specific Fab clones after three cycles of panning.

Table S11. Titer of HBcAg-specific IgM and IgG extracted from the liver of patients with HBV-associated acute liver failure (ALF) and from one healthy liver donor.

Table S12. Identical V(D)J sequences appearing in both IgG and IgM samples in patients with acute liver failure.

Table S13. Sequence alignment of IgG and IgM antibodies in patients with acute liver failure.

Table S14. Property and prevalence of high-affinity germline anti-core clones in the intrahepatic IgM and IgG repertoire assessed by next generation sequencing (NGS).

Table S15. Number of somatic mutations within the variable heavy chain (VH) gene and binding affinity to hepatitis B core antigen (HBcAg) measured by surface plasmon resonance of selected Fabs recovered from the livers of patients with HBV-associated acute liver failure (ALF) and chimpanzees with acute hepatitis B.

## SI Materials and Methods

**Patients.** At the time of liver transplantation, for each of the 4 patients with ALF we obtained serum and 4 liver specimens for Patient 241, 4 for Patient 31, 5 for Patient 219 and 4 for Patient 32. Serum and individual specimens were also obtained from each of the 17 controls. Liver and serum specimens, along with the clinical data, were received under code to protect the identity of the subjects. The diagnosis of HBV-associated ALF was based on the presence of serum hepatitis B surface antigen (HBsAg) and/or IgM antibody to hepatitis B core (anti-HBc IgM). At admission, all patients with ALF were tested for antibodies against hepatitis A, B, C and D, cytomegalovirus, Epstein Barr virus and human immunodeficiency virus (HIV), as well as hepatitis C virus (HCV) and hepatitis D virus (HDV) RNA, and all were negative. Each liver specimen, obtained from patients with ALF or controls, was divided into two pieces: one was snap frozen and the other was formalin-fixed and paraffin-embedded (FFPE). Snap-frozen samples were stored at -80°C for molecular studies, including mRNA and microRNA-expression profiling, next-generation sequencing, and phage display library. Fixed liver tissue was used for immunohistochemistry and pathological examination by two expert hepatopathologists (D.E.K. and S.G.).

**Serology.** All patients were tested for standard HBV serology as well as for titers of HBsAg, IgM and IgG anti-HBc. Serum HBsAg, anti-HBs, antibody to hepatitis B core antigen (anti-HBc), IgM anti-HBc, hepatitis B e antigen (HBeAg), anti-HBe, IgM antibody to HAV, Epstein-Barr virus, and cytomegalovirus, anti-HCV, and anti-HIV were measured with commercial enzyme immunoassays (Abbott Laboratories). Titers of IgM and IgG anti-HBc were determined with enzyme immunoassays by testing 2-fold serial dilutions. HBsAg was quantified by reference to the US Bureau of Biologics internal standard. IgG and IgM anti-HDV were measured with commercial enzyme immunoassays (Sorin Biomedica). Serum HBV DNA was quantified by a commercial assay (Amplicor HBV Monitor test; Roche

Diagnostics). Serum HDV RNA was determined by PCR (1) and serum HCV RNA by a commercial assay (Cobas Amplicor HCV Monitor 2.0; Roche Diagnostics).

**Chimpanzees.** Due to ethical reasons, the study of liver specimens during the acute phase of viral hepatitis in humans is not possible. Acute hepatitis B in chimpanzees has been studied extensively in chimpanzees and it was demonstrated to be virtually identical to that seen in humans (2, 3). To compare ALF with classic acute hepatitis B, we studied two chimpanzees previously infected with HBV (ayw) (2, 3). The virologic course of acute HBV infection, the T-cell immune responses, and the gene expression profiling were reported previously (2, 3). Here, we assessed the levels of serum HBV DNA, HBeAg and the titer of IgG and IgM anti-HBc throughout the disease course, the liver pathology in serial archival liver biopsies throughout the course of HBV infection, analyzed the intrahepatic expression of specific cell lineage markers at three time points during the acute infection (Ch. 5835: week 6, 18, and 20; Ch.1627: week 10, 14, and 20), and generated phage-display Fab libraries using RNA extracted from stored liver specimens of each animal at the time of viral clearance (Ch. 5835: week 18; Ch.1627: week 14, and 16). The phage display libraries were panned against the autologous HBsAg and HBcAg. The Fab fragments were sequenced and their affinity was studied by using surface plasmon resonance (SPR) on a Biacore 3000 (GE Healthcare, Piscataway, NJ).

**Serum and liver DNA extraction and real-time polymerase chain reaction.** Total DNA was purified from serum samples using QIAamp DNA Blood Mini Kit (Qiagen, Hilden, Germany), and from liver specimens using Qiagen DNeasy kit (Qiagen). The levels of HBV DNA were determined in serum and liver using a real-time PCR, as previously reported (4). Liver total RNA was extracted from stored frozen liver specimens using TRIzol reagent (Invitrogen, Carlsbad, CA) according to the manufacturer's recommendations. The

intrahepatic amounts of HBV DNA and HBV RNA, were determined using PCR assays as previously reported (5, 6) with minor modifications.

**Full genome hepatitis B virus next-generation sequencing.** To investigate the genetic heterogeneity of HBV strains associated with ALF, HBV full-genome sequencing was performed both in serum and liver of each of the 4 patients with this disease using next-generation sequencing. Viral DNA was purified from serum using the QIAamp DNA Blood Mini Kit (Qiagen, Valencia, CA) and liver specimens using Qiagen DNeasy kit. (Qiagen, Valencia, CA). Multiple PCR reactions were performed to cover the entire HBV genome obtained from serum and liver of each of the 4 patients with HBV-associated ALF. PCR primers were designed to match the HBV reference sequence V01460 (genotype D, serotype ayw) and used for PCR amplification. PCR products were purified using a MinElute kit (Qiagen, USA). DNA was sheared randomly, processed into a sequencing library using Ion Torrent's Fragment Plus kit and quantified using the Qubit system (Invitrogen). Sequencing libraries were prepared and deep sequencing was performed in an Ion Torrent next-generation sequencer Personal Genome Machine (PGM) as described previously (7). Details on the next-generation sequencing method are reported in the Supplementary Information.

**Sequence analysis of HBcAg from chimpanzees with acute hepatitis B.** The HBcAg-coding genes were initially amplified from chimpanzees' liver RNA by RT-PCR with 30 cycles of 95°C, 1min, 55°C, 1 min, and 72°C 1min, using the following set of primers, core 5'-1: ATGCAACTTTTTACCTCTGCCTA, and core 3'-1: CTAACATTGAGATTCCCGAGATTGAGATCT. The first PCR product was used as a template for further amplification by semi-nested PCR with a new 5'-end primer (TTCAAGCCTCCAAGCTGTGCCTTGG) and the same 3'-end primer under the same cycling condition as in the first PCR. The PCR products were purified and cloned into pGEM-T (Promega) vector. To avoid the possibility that mutations were introduced by PCR,

five clones from each chimpanzee were sequenced. Consensus HBcAg-coding sequence was determined only when all five clones showed the same nucleotide sequences. The presence of mutations in the precore region as well as in the core region were identified by comparison with the reference ayw sequence (8), as the two animals were inoculated with HBV, strain ayw.

**Cell Culture and Transfection.** Human hepatoma cells, HepG2, were maintained in Dulbecco's modified Eagle's medium (DMEM; Invitrogen) supplemented with 10% fetal bovine serum at 37°C and 5% CO<sub>2</sub>. The cells were grown to 70-80% confluence in 10-cm-diameter dishes and transfected with DNA by TransIT-2020 (Mirus, Madison, WI). A total of 15 µg of 3.2-kb linear full-length HBV genomic DNA were used to transfect HepG2 cells. To ensure that the same amount of DNA for each construct was used in transfection experiments the concentration of each HBV DNA preparation was determined by spectrophotometer and was confirmed on agarose gel. The culture supernatants and the cells were collected 52-72 h post-transfection, and viral DNA and antigens were quantified. Transfections were conducted at least three times with independently prepared cells and DNA. Production of HBsAg in culture supernatant, as indication of successful transfection, was monitored in each transfection.

**Quantification of HBV DNA and HBV RNA in tissue culture by real-time polymerase chain reaction.** To remove input HBV DNA, culture supernatants were treated with DNase I (RQ1 RNase-Free DNase, Promega # M6101). Total extracellular DNA was then extracted with a QIAamp DNA Blood Mini Kit (Qiagen). For extraction of total intracellular viral DNA, the transfected cells were lysed with RIPA buffer (Sigma), followed by DNaseI treatment. The viral DNA was released from the core particle by proteinase K treatment and purified by phenol/chloroform extraction. The viral DNA was finally precipitated by ethanol and resuspended in TE buffer. Intracellular RNA was extracted

from whole-cell lysates by using the RNeasy Mini Kit (Qiagen), followed by DNaseI treatment. Complementary DNA was synthesized with the ABI High-Capacity cDNA Reverse Transcription Kit (Applied Biosystems #4374967). The levels of extracellular HBV DNA and intracellular HBV DNA and RNA (cDNA) were determined using quantitative real-time polymerase chain reaction, as previously reported (5) and described above in the serum and liver DNA extraction and real-time polymerase chain reaction section.

**Quantification of HBsAg and HBcAg expression in tissue culture.** The amount of hepatitis B surface antigen (HBsAg) in cell culture supernatants was determined with commercial immunoassays (DiaSorin, Saluggia, Italy), using a US Bureau of Biologics internal reference standard as described previously (9). The amount of HBcAg was quantified by ELISA and immunoprecipitation followed by Western blotting (IP-WB). First, a total of 7 anti-core antibodies were tested for reactivity to wild-type, 241 and 31 core proteins by ELISA and WB (Table S4). As a result, serum IgM from patient 32 and 219, and serum IgG from patient 98 with chronic hepatitis B were found to react with wild-type, 241 and 31 core protein equally well and therefore were selected for the assay. Cells were washed 3 times with PBS at 52-72 h post-transfection and lysed with 1 ml of RIPA buffer (Sigma). The cell lysates were clarified by centrifugation and the supernatant was used for either ELISA or IP-WB. For ELISA, streptavidin-coated plates (ThermoFisher Scientific) were first incubated with biotinylated anti-IgM at 0.1  $\mu$ g per well for 2 h, followed by incubation with patient 32/219 serum containing anti-HBc IgM for 2 h. After washing, serial 3-fold dilutions of cell lysates from cultures transfected with various HBV DNA or untransfected/vector-transfected controls were added starting from 150  $\mu$ l of the undiluted lysate, and incubated for 1 h. Captured HBcAg was detected by human anti-HBcAg IgG from P98 serum followed by incubation with HRP-conjugated goat anti-human IgG Fc. Each assay included purified recombinant HBcAg of wild-type-HBV, 31 or 241 as positive controls. Serially 3-fold diluted recombinant HBcAg from the wild-type-HBV, 31 and 241 strains were used to generate linear



standard dose-response curves, which was used to calculate the concentration of HBcAg of wild-type-HBV, 31 or 241 in the cell lysate, respectively (Fig. S2, A and B). The assay was repeated three times and the results were analyzed by unpaired t-test for statistical significance. IP-WB was only performed on samples with ayw and 241 transfections because no antibodies that can react with 31 core protein on WB were available. For IP-WB, the cell lysates (400  $\mu$ l) of HepG2 transfected with wild-type-HBV, 241 HBV DNA or untransfected HepG2 were incubated with 2  $\mu$ l of human anti-HBcAg IgM from P32 overnight at 4°C. The IgM-HBcAg complex was captured by protein G beads pre-loaded with goat anti-human IgM. After extensive washing, the beads were resuspended in SDS-PAGE sample buffer and proteins were separated on a 4-12% NUPAGE gel, followed by transfer onto a PVDF membrane. After blocking in 5% milk in PBS for 1 h, the membrane was incubated with human P98 serum containing anti-HBc IgG overnight at 4°C. After washing, the membranes were incubated with HRP-conjugated anti-human IgG Fc for 1 h at room temperature. The blot was developed by incubation of the membrane with Supersignal west dura extended duration substrate (Thermo Scientific) and exposed to X-ray film.

**Generation of full-length replication competent HBV DNA genomes.** The synthesized HBV DNA monomers were cloned into pUC57 plasmid at XhoI site. Upon digestion with XhoI restriction enzyme, the full-length HBV genome was released from the vector and used for transfection and subsequent functional analysis. QuickChange Lightning Site-Directed Mutagenesis Kit (Agilent Technologies, La Jolla, CA) was used to introduce G1896A mutation into wild-type ayw HBV genome, resulting in generation of ayw mutant strain containing the precore stop codon. The presence of the mutation was confirmed by DNA sequencing.

**Expression of HBsAg in mammalian cells.** Based on HBV sequences obtained from each patient with ALF (patient 31, 32, 219 and 241), a 2.2-kb gene fragment corresponding to

nucleotide positions 2705 to 1745 of the HBV coding for S gene promoter 1 and 2, enhancer I and II, and preS1, preS2 and S peptides was synthesized by Gene Art (Invitrogen) in accordance with HBV sequences for each patient with ALF and the published ayw HBV sequence (8). The gene was cloned into pFRT/LacZeo vector at AscI and SacI sites and the construct was verified by sequencing. HepG2 cells were transfected with the construct using TransIT-2020 (Mirus) and then incubated at 37°C, 5% CO<sub>2</sub> for 6 days for expression. The expressed HBsAg in culture supernatant was collected and detected by ELISA using rabbit anti-S polyclonal antibody (Fitzgerald 20-HR20) and mouse anti-S monoclonal antibody (mAb) (Fitzgerald 10-H051). For the ELISA, wells in a 96-well plate were coated with anti-S mAb, followed by addition of culture supernatant and the captured HBsAg was then detected by anti-S polyclonal antibody. HBsAg (available from antibodies-online.com, ABIN622168) was used as positive control. The culture supernatant was concentrated by 10-20-fold using Amicon-100 kD cut (Millipore) and was used for panning a phage Fab library.

### **Expression and purification of HBV core particles from patients with HBV-**

**associated ALF.** Based on sequencing data, genes coding for HBcAg of patient 31, 32, 219 and 241, and the gene coding for wild-type ayw HBcAg (8) were synthesized by Gene Art (Invitrogen). Each HBcAg-encoding gene was cloned into pET14b at NcoI and XhoI sites and was confirmed by sequencing. The *E. coli* of BL21(DE3)pLysS cells were transformed with the recombinant plasmids carrying HBcAg-encoding genes and grown for expression. Briefly, a single bacterial colony was inoculated into 10 ml of LB media and incubated with shaking at 37°C overnight. The overnight culture was transferred into 500 ml of fresh LB and cultured for 2-4 h at 37°C. The expression was induced by addition of IPTG to final concentration of 0.2 mM and the culture continued for additional 4 h. The bacterial cells were collected by centrifugation at 5000xg for 15 min, resuspended in 40 ml of 1X PBS, and lysed through three cycles of freeze/thaw. The HBV core particles in the supernatant following centrifugation were precipitated by addition of ammonium sulfate to final 25% saturation and incubation

with rotation at 4°C for 2h. The pellet was collected by centrifugation and resuspended in 3 ml of 1x PBS. The HBV core particles were finally purified by ultracentrifugation on 15-45% sucrose gradient, buffer-exchanged and concentrated in 1X PBS by ultrafiltration with MW cutoff of 100 kD and sterilized by filtration through 0.22 µm filter. The purity and concentration of HBV core particles were estimated by SDS-PAGE along with known concentration of commercial available HBV core protein and the identity was confirmed by reaction with polyclonal anti-HBc on enzyme-linked immunoassay (ELISA).

**Kinetics analysis of HBcAg expression in cell culture.** Linear full-length replication-competent HBV DNA of ayw, 31 and 241 were generated by XhoI digestion and used for transfection. HepG2 cells were maintained in DMEM supplemented with 5% fetal bovine serum at 37°C and 5% CO<sub>2</sub>. The cells were grown to 70-80% confluence in 5-cm-diameter dishes and transfected with DNA by TransIT-2020 (Mirus, Madison, WI). A total of 5 µg of 3.2-kb linear full-length HBV genomic DNA was used to transfect HepG2 cells. The cells were collected on day 1, 3 and 5, respectively after transfection, and HBcAg was quantified by ELISA as described before. Transfection experiments were repeated at least two times with independently prepared cells and DNA. The production of HBsAg in culture supernatant, as indication of successful transfection, was monitored in each transfection.

**Immunofluorescence, confocal microscopy and imaging analysis.** HepG2 cells were transfected with full-length, replication-competent linear HBV DNA of wild-type HBV strain (ayw) or one of two ALF-variants (HBV-31, HBV-241) and cultured for 48 h. The transfected HepG2 cells were fixed with 4% formaldehyde in PBS for 15 minutes at room temperature, followed by 3 washes with 1XPBS. Cells were also fixed and permeabilized with 0.5% Triton X-100 for 5 minutes at room temperature. Both fixed only and fixed plus permeabilized cells were blocked with 5% BSA, 2% goat serum in PBS for 1 h at room temperature, followed by incubation with primary antibodies; human anti-HBcAg C7 (isolated

from an ALF patient) (1 $\mu$ g/ml) and anti-HBsAg (Abcam) (1:3) for 2h at room temperature. After washing three times with 1XPBS, Alexa-488 or Alexa-594 conjugated secondary antibodies (Invitrogen) (1:500) were applied for 1 h at room temperature, and then cells were washed again three times with 1XPBS. Finally, cells were incubated briefly (5 min) with 0.3 mM DAPI (4', 6'-diamidino-2-phenylindole) and were washed once with 1XPBS. Slides were mounted in Prolong Gold (Invitrogen).

Images were obtained using a Leica SP5 X-WLL laser scanning confocal imaging system (Leica Microsystems, Exton, PA, USA) equipped with the 40X (NA 1.25) and 63X (NA 1.4) oil immersion objectives. DAPI was excited using UV 405 laser, rest of the fluorophores were excited with a white light laser with a range of wavelengths (470-670nm). Differential interference contrast (DIC) imaging technique was used to retrofit fluorescence images in order to show localization of the fluorescent signal on the plasma membrane and inside the cells. To avoid emission crosstalk, sequential frame averaged scans were set up for each fluorophore and DIC. Data were deconvolved using Huygens Professional software (version 18.04.0-p5, Scientific Volume Imaging BV, Hilversum, Netherlands) and images were exported using Imaris software (version 9.2.0, Bitplane AG, Zurich, Switzerland).

**Cell surface binding of HBcAg and complement fixation.** HepG2 cells were seeded in a 6-well plate with cover slips at 60% confluence. After culture for 2 days at 37°C, 5% CO<sub>2</sub> in DMEM with 10%FBS, the cells were washed twice with cold PBS. A recombinant HBcAg derived from wild-type HBV (ayw) or ALF-HBV (31 or 241) at a concentration of 10  $\mu$ g/mL in PBS containing 10% FBS were added into separate wells. Wells with no HBcAg, but PBS containing 10% FBS served as negative controls. The plate was incubated on ice for 1 h followed by 5-minute washes with cold PBS. The plate was subsequently incubated with 1 $\mu$ g/ml of anti-core Fab E3 conjugated with Alexa-647 (cloned from the liver of an ALF patient) in PBS/10%FBS on ice for 1 h. Following 3 washes with cold PBS, cells were fixed

with 4% formaldehyde in PBS for 15 minutes at room temperature. Finally, cells were washed, stained with DAPI, mounted on slides and examined using confocal microscopy.

Flow cytometry analysis was also used to examine the binding of HBcAg to the cellular membrane. Single-cell suspensions of HepG2 cells were incubated with LIVE/DEAD fixable Aqua dead cell stain (Invitrogen, ref. L34957) to assess their viability. After washing with FACS Buffer (2% FBS in PBS), the cells were incubated at 4 °C with 10 µg/ml HBcAg derived from HBV wild-type (ayw), HBV-31 or HBV-241 in 500 µl PBS/2% FBS for 1 hour. In the binding assay, HBcAg particles were detected using Alexa 647-conjugated HBcAg-specific Fab E3. In the complement-fixation experiment, the cells were further incubated at 4°C with 1 µg/ml human anti-HBcAg (IgG1C7) in 500 µl PBS/2% FBS for 1 hour, followed by incubation with 2.8 µg/ml C1q purified protein (Complement Technology Inc.) for an additional hour. Then, the cells were washed and stained with rabbit anti-C1q FITC antibody (Abcam, ref. ab4223). Finally, the cells were fixed and permeabilized using BD Cytofix/Cytoperm Kit (Becton Dickinson). Samples were analyzed on a CANTO-II flow cytometer (Becton Dickinson) and FlowJo v10 software. At least 30,000 live cells were counted per sample, and the median fluorescence intensity (MFI) was determined. Threshold levels were set according to the negative control. Fold changes were calculated by dividing the MFI value of the sample by the value of the negative control. In the complement-mediated cell-lysis experiment, after the formation of the immune complexes with the anti-HBcAg human antibody IgG 1C7 the cells were incubated for 1 hour at 37°C in the presence of complete serum diluted 1:400 in PBS. Then, the cells were stained with propidium iodide and analyzed within 1 hour on a CANTO-II flow cytometer; at least 10,000 cells were counted per sample, and the percent of propidium iodide-positive cells was determined. The threshold levels were set according to the negative control (cells treated with complete or C3-depleted serum in the absence of immune complexes).

**Immunohistochemistry.** Formalin-fixed paraffin-embedded liver sections obtained from each patient with ALF were used to perform immunohistochemical staining using a panel of antibodies including CD3, CD8, CD20, CD68, CD163, IgM, IgG, Kappa, Lambda, Mum-1, C1q, HBsAg, HBcAg (Dako), CD4, CD138 (AbD Serotec). We also used CD8 (Leica Biosystems) and CD163 (Thermo Scientific). Briefly, sections of 3 to 5  $\mu\text{m}$  were deparaffinized through graded alcohols and xylene. Immunohistochemical stainings were performed after antigen retrieval using either citrate buffer (10 mmol, pH 6.0) or EDTA (1 mmol, pH 9.0). Slides were incubated in Tris-goat serum (3%) for 15 min and then incubated at room temperature with primary antibodies. Detection was carried out on the automated system BenchMark XT autostainer (Ventana Medical Systems) or Bond RX (Leica Biosystems) platform according to the manufacturer-supplied protocols. Formalin-fixed liver sections obtained from two chimpanzees (Ch. 5835 and Ch.1627) at three time-points during the course of acute self-limited hepatitis B were stained using the same panel of antibodies as used for human tissue.

**Gene-expression profiling and statistical analysis.** Gene-expression profiling was performed on messenger RNA (mRNA) in all 17 liver specimens obtained from the four patients with ALF and in all 17 controls, using Affymetrix Human U133 Plus 2 arrays (Affymetrix, Santa Clara, CA), containing 54,675 probe sets representing approximately 38,500 human genes, as previously reported (10). MicroRNA-expression profiling was performed on 13 liver specimens, including 2 liver specimens for patient 241, 3 for patient 31, 5 for patient 219 and 3 for patient 32, and in 17 liver specimens of the control group, using Affymetrix GeneChip miRNA 2.0 arrays (Affymetrix), which contain 1,121 pre-microRNA (mir-), and 1,105 mature microRNA (miR-) probe sets, as previously reported (11). As Affymetrix IDs, originally referred to miRBASE 15, differ from the latest miRBase 21 nomenclature (<http://www.mirbase.org/>) a synopsis of original Affymetrix IDs and miRBase 21 IDs is shown in table S8. False miRNAs removed from miRBase 21 were also excluded

from the study. RNA was extracted from frozen liver specimens using the miRNeasy Mini Kit (Qiagen). Total RNA (500 ng), including microRNA, was poly(A) tailed and then directly ligated to a fluorescent dendrimer (a branched single and double stranded DNA molecule conjugated to biotin) using the FlashTag Biotin HSR RNA Labeling Kit (Affymetrix). An ELOSA was performed prior to hybridization and analysis of the arrays in order to verify that all miRNAs were correctly labeled with the biotin molecule at the 3' end. All samples passed the quality control (QC) assessment performed with the miRNA QCTool available through Affymetrix, using chip-specific quality control probes. RNA quality and integrity was assessed with the RNA 6000 Nano Assay on the Agilent 2100 Bioanalyzer (Agilent Technologies, Santa Clara, CA). Raw microarray data (cel files) were imported into BRB-ArrayTools ([linus.nci.nih.gov/BRB-ArrayTools](http://linus.nci.nih.gov/BRB-ArrayTools)). Probe set summaries were computed using the RMA algorithm. Multiple transcripts of the same gene were averaged, whereas transcripts of unknown genes were discarded. For the comparison between ALF and control livers, multiple specimens obtained from the same liver were averaged. MicroRNA and mRNA differentially expressed in ALF were identified by a multivariate permutation F-test with a maximum false discovery rate of 1 % with 80 % confidence level, using BRB-ArrayTools (12). Principal component analysis was obtained using Multibase ([www.numericaldynamics.com](http://www.numericaldynamics.com)). Statistical analyses were done with log<sub>2</sub>-transformed data. Fold changes were calculated as the ratio between the geometric means of ALF livers and normal livers. To ensure a robust analysis, only mRNAs with absolute fold changes >3 were selected for the analysis. Functional data were obtained from IPA (Ingenuity® Systems, [www.ingenuity.com](http://www.ingenuity.com)).

**Screening of Fab-display phage libraries.** Phage libraries of IgG1 and IgM Fab were panned separately by solid-phase selection on ELISA plates coated with homologous or wild-type HBsAg and HBcAg. For HBcAg panning, wells of 96-well plate were coated with 100  $\mu$ L /well of solution of 5  $\mu$ g/ml antigen in 1x PBS. For HBsAg panning, wells of 96-well plate

were coated with 100  $\mu$ L /well of 5  $\mu$ g/ml of anti-S monoclonal antibody and the coated antibody was used to capture HBsAg following addition of 100  $\mu$ L of concentrated culture supernatant. Wells were incubated overnight at 4°C and blocked with 3% milk in 1x PBS. Phage Fab suspensions containing  $10^{12}$  pfu in 100  $\mu$ L 1x PBS with 2% milk were added and incubated for 2 h at room temperature. After incubation, phages were aspirated, the wells were washed, and bound phages were eluted, titrated, and replicated as described (13). After three rounds of panning, 96 randomly picked single phage-Fab clones from each library were screened for specific binding to the respective antigen by phage ELISA as described (9).

### **Analysis of intrahepatic IgM and IgG extracted from liver tissues of ALF**

**patients.** Frozen liver tissue obtained from two patients with HBV-ALF and from a control liver donor, negative for HBV markers with normal liver pathology, were homogenized in 1 ml of 1XPBS. The extracts were incubated at 37°C for 10 min after adding urea to final concentration of 5M, and then centrifuged for 10 min at 15,000xg. The supernatants were collected and dialyzed overnight against 1XPBS. The total protein concentration in each liver tissue extract was measured by BCA (ThermoFisher Scientific) and used for normalization. Total and core specific IgM and IgG were quantified by ELISA along with commercially available IgM and IgG with known concentration as positive controls. A total of 100  $\mu$ l of goat-anti-human IgM or IgG at 4  $\mu$ g/ml were coated in each well of a 96-well plate. After blocking with 3% milk in 1XPBS and washing, 100  $\mu$ l of liver extract and seven 3-fold serial dilutions were added to each well. Seven 3-fold serial dilutions of commercially available IgM and IgG starting with 3  $\mu$ g/ml were also included as standard curves. The captured IgM or IgG was detected by HRP-conjugated monoclonal anti-human IgM or anti-IgG, respectively. The reaction was developed by adding tetramethylbenzidine (TMB) and stopped by adding sulfuric acid, and the intensity was measured using an ELISA reader at OD<sub>450</sub>. A linear standard curve was made for the control IgM or IgG antibodies, from which the concentration of IgM and IgG extracted from the liver was calculated. The final concentration



of IgM and IgG from each sample was normalized as amount of IgM and IgG per microgram of total protein. The antibody titers of core-specific IgM and IgG were determined by ELISA. For core-specific IgM, 100  $\mu$ l of goat anti-human IgM at 4  $\mu$ g/ml were added into each well in a 96-well plate. After blocking and washing, the liver extract and its 3-fold serial dilution were added into each well from top to the bottom, followed by adding 3 recombinant HBcAg, ayw, 219 and 241 at 5  $\mu$ g/ml for each sample. The captured HBcAg was detected by anti-HBc positive serum from a patient with chronic hepatitis B and then revealed by HRP-conjugated monoclonal anti-human IgG. For titration of core-specific IgG, 100  $\mu$ l of goat anti-human IgG at 4  $\mu$ g/ml were added into each well of a 96-well plate. After blocking and washing, 3-fold serial dilutions of the liver extracts were added into each well, followed by washing and addition of recombinant HBcAg (ayw, 219 and 241) at 5  $\mu$ g/ml. Captured HBcAg was detected using serum from ALF patient 241 and subsequently by HRP-conjugated monoclonal anti-human IgM. The reaction was developed as above with TMB. The nonspecific IgM and IgG were used in each plate for negative controls. All OD<sub>450</sub> values were subtracted by the OD<sub>450</sub> value from the negative controls. The last sample dilution that reached OD<sub>450</sub> value >0.2 was regarded as antibody titer (OD value for the negative control was around 0.045). The titer was normalized based on the total protein, whereby each sample was adjusted to the same amount of total protein.

**Affinity measurement by SPR.** HBS-EP buffer (10 mM HEPES pH 7.4, 150 mM NaCl, 3.4 mM EDTA, 0.005% surfactant P20) was used as the working buffer for all SPR binding experiments. Buffers and reagents for amine coupling (n-(3-dimethylaminopropyl)-n'-ethylcarbodiimide hydrochloride, n-hydroxysuccinimide, and acetate buffers) as well as sensor chips CM5 were acquired from Biacore, GE Healthcare (Piscataway, NJ). SPR experiments were performed in a Biacore 3000 instrument (GE Healthcare, Piscataway, NJ) at 25 °C. Antigens were coupled to the sensor surface of CM5 chip by standard amine coupling (14). Immobilization was achieved with 100  $\mu$ g/mL protein in sodium acetate buffer at pH 4.5

using a flow rate of 5  $\mu\text{L}/\text{min}$ . The target immobilization level of antigen of  $\sim 1000$  RU was obtained by adjusting the reaction time. For each sensor chip, a reference surface was prepared by activating the surface followed by mock derivatization without injecting antigen. For binding affinity analyses, a series of 7 concentrations (0.3 – 500 nM) of each Fab molecule was injected across the sensor surface at a flow rate of 5  $\mu\text{L}/\text{min}$ . The time-course of the binding signal was observed for 1,200 sec, followed by 3,600 sec observation of dissociation during buffer wash. If the signal at the end of this period has not returned to baseline level, a regeneration step with 5 $\mu\text{L}$  injection of NaOH solution (5 – 25 mM) was used to break the remaining binding, which caused the signal to return to baseline. SPR binding data were first processed in BIAevaluation (version 4.0.1, Biacore GE Healthcare, Piscataway, NJ) in order to subtract reference signals including both the signal from the reference cell and the background signal observed in blank buffer injections. The processed data were then exported into Microsoft Excel and saved as an .xls file, which is used as the input file for binding analysis in the software EVILFIT (<https://www.youtube.com/watch?v=QXkXTN0gwck>) using the surface site distribution model as previously described in detail (15). Briefly, the kinetic traces of all the concentrations of the Fab molecule binding to the immobilized antigen under study were globally fitted for continuous distributions of equilibrium binding constants ( $K_d$ ) and dissociation rate constants ( $k_{\text{off}}$ ). In the resulting site distribution plot, the main peaks were integrated to calculate the average  $K_d$  and  $k_{\text{off}}$  values corresponding to the observed binding events.

**Next-generation sequencing of intrahepatic IgM and IgG repertoire and bioinformatics analysis of Illumina paired-end sequencing.** To amplify genes coding for Fd (VH + CH1) we used the same set of 5'-end VH family specific primers and 3'-end IgM-or IgG1-specific CH1 primer that we previously used in the construction of the phage display library. A total of 10 amplicons were generated, including IgM and IgG from

liver RNA extracted from ALF-Patient 31, 241, 32, 219 as well as from a liver donor with histologically normal liver (donor 37) that was negative for markers of HBV infection. The amplicons were purified and subjected to Illumina 2X300 bp paired-end sequencing and analyzed (details are provided in the supplementary information). Briefly, Illumina adapters were added to 30 ng of amplicon DNA using the Ovation Ultralow System V2 1-96 kit (NuGen Technologies, Inc.). Amplicons were pooled in an equal volume ratio. An aliquot of the pool was run on a MiSeq (Illumina, Inc.) using a MiSeq Reagent Nano kit, ver2. This QC run consisted of 25 cycles followed by an index read. The pool was then rebalanced based on the percentage of reads seen for each amplicon's indexes. The final pool was then sequenced on the HiSeq 2500 in Rapid mode using version 2 chemistry to generate a minimum of 9 M paired-end 300 base reads per amplicon. Post-run processing of data was performed using RTA 1.18.64 and CASAVA 1.8.2. Paired-end Illumina sequencing reads were merged using FLASH (Fast Length Adjustment of SHort reads) (16). Primer sequences were removed using FLEXBAR with 0.3 threshold (17). The Stand-alone IGBLAST (18) running on the NIH HPC Biowulf Linux cluster (<https://hpc.nih.gov/>) was used for V(D)J germline gene assignments, and an in-house developed python script was applied to process IGBLAST outputs (19). Non-Ig, non-duplicate and non-production reads were filtered out. Reads containing stop codon and Phred scores of less than 20 occurring over 80% of the V(D)J region were also discarded from all NGS samples. Only sequences assigned FR1-FR4 were retained in the data set. Unique antibody sequences were extracted from reads passing the steps above and were subjected to further analysis. The first nucleotide of the second conserved cysteine codon of the V region was used to evaluate somatic hypermutations. Antibody sequences with equal or less than 1% mutations were considered to be in germline configuration. Antibody sequences shared between IgG and IgM were evaluated at the V(D)J region. For the total reads of high affinity antibodies in NGS samples, we used the V, J germline gene and amino acid sequence of CDRH3 as a filter to extract reads from NGS samples, and more than three mutations on the V germline region were removed. Matplotlib plotting library was used to draw the

corresponding figures. Only reads that had at least two identical sequences at the nucleotide level over the entire V(D)J region were defined as duplicate reads and used for further analysis, including VDJ assignment. The prevalence of high affinity anti-core antibodies in the liver of ALF patients was assessed in the entire IgG and IgM repertoire by using two methods. The first method was based on the quantification of duplicate reads, which are defined as NGS reads that are 100% identical to each other at the nucleotide level over the entire V(D)J region. Thus, the prevalence of a particular sequence using this method was quantified by the total number of duplicate reads that differ by  $\leq 1\%$  at the nucleotide level from that particular sequence normalized by the total number of duplicate reads. The second method was based on the quantification of unique duplicate sequences. Unique duplicate sequences are the set of individual sequences, none of which are identical to each other but for which at least two 100% identical NGS reads of each sequence have been identified. The prevalence of a particular sequence quantified by the unique duplicate sequences method would be the total number of individual sequences that differ by  $\leq 1\%$  at the nucleotide level from that particular sequence, normalized by the total number of unique duplicate sequences.

## References and Notes

1. Farci P, *et al.* (2004) Long-term benefit of interferon alpha therapy of chronic hepatitis D: regression of advanced hepatic fibrosis. *Gastroenterology* 126(7):1740-1749.
2. Thimme R, *et al.* (2003) CD8(+) T cells mediate viral clearance and disease pathogenesis during acute hepatitis B virus infection. *J Virol* 77(1):68-76.
3. Wieland S, Thimme R, Purcell RH, & Chisari FV (2004) Genomic analysis of the host response to hepatitis B virus infection. *Proc Natl Acad Sci U S A* 101(17):6669-6674.
4. Engle RE, *et al.* (2014) Transfusion-associated hepatitis before the screening of blood for hepatitis risk factors. *Transfusion* 54(11):2833-2841.
5. Melis M, *et al.* (2014) Viral expression and molecular profiling in liver tissue versus microdissected hepatocytes in hepatitis B virus-associated hepatocellular carcinoma. *J Transl Med* 12:230.
6. Pollicino T, *et al.* (2011) Replicative and transcriptional activities of hepatitis B virus in patients coinfecting with hepatitis B and hepatitis delta viruses. *J Virol* 85(1):432-439.
7. Rothberg JM, *et al.* (2011) An integrated semiconductor device enabling non-optical genome sequencing. *Nature* 475(7356):348-352.
8. Galibert F, Mandart E, Fitoussi F, Tiollais P, & Charnay P (1979) Nucleotide sequence of the hepatitis B virus genome (subtype ayw) cloned in *E. coli*. *Nature* 281(5733):646-650.
9. Farci P, *et al.* (2010) B cell gene signature with massive intrahepatic production of antibodies to hepatitis B core antigen in hepatitis B virus-associated acute liver failure. *Proc Natl Acad Sci U S A* 107(19):8766-8771.
10. Nissim O, *et al.* (2012) Liver regeneration signature in hepatitis B virus (HBV)-associated acute liver failure identified by gene expression profiling. *PLoS One* 7(11):e49611.
11. Diaz G, *et al.* (2013) Identification of microRNAs specifically expressed in hepatitis C virus-associated hepatocellular carcinoma. *Int J Cancer* 133(4):816-824.
12. Simon R, *et al.* (2007) Analysis of gene expression data using BRB-ArrayTools. *Cancer Inform* 3:11-17.

13. Chen Z, *et al.* (2007) Characterization of chimpanzee/human monoclonal antibodies to vaccinia virus A33 glycoprotein and its variola virus homolog in vitro and in a vaccinia virus mouse protection model. *J Virol* 81(17):8989-8995.
14. Schuck P, Boyd LF, & Andersen PS (2004) Measuring protein interactions by optical biosensors. *Curr Protoc Cell Biol* Chapter 17:Unit 17 16.
15. Svitel J, Balbo A, Mariuzza RA, Gonzales NR, & Schuck P (2003) Combined affinity and rate constant distributions of ligand populations from experimental surface binding kinetics and equilibria. *Biophys J* 84(6):4062-4077.
16. Magoc T & Salzberg SL (2011) FLASH: fast length adjustment of short reads to improve genome assemblies. *Bioinformatics* 27(21):2957-2963.
17. Dodt M, Roehr JT, Ahmed R, & Dieterich C (2012) FLEXBAR-Flexible Barcode and Adapter Processing for Next-Generation Sequencing Platforms. *Biology (Basel)* 1(3):895-905.
18. Ye J, Ma N, Madden TL, & Ostell JM (2013) IgBLAST: an immunoglobulin variable domain sequence analysis tool. *Nucleic Acids Res* 41(Web Server issue):W34-40.
19. Joyce MG, *et al.* (2016) Vaccine-Induced Antibodies that Neutralize Group 1 and Group 2 Influenza A Viruses. *Cell* 166(3):609-623.
20. Gunther S, *et al.* (1995) A novel method for efficient amplification of whole hepatitis B virus genomes permits rapid functional analysis and reveals deletion mutants in immunosuppressed patients. *J Virol* 69(9):5437-5444.
21. Pollicino T, *et al.* (2006) Hepatitis B virus replication is regulated by the acetylation status of hepatitis B virus cccDNA-bound H3 and H4 histones. *Gastroenterology* 130(3):823-837.

## Supplementary Figures

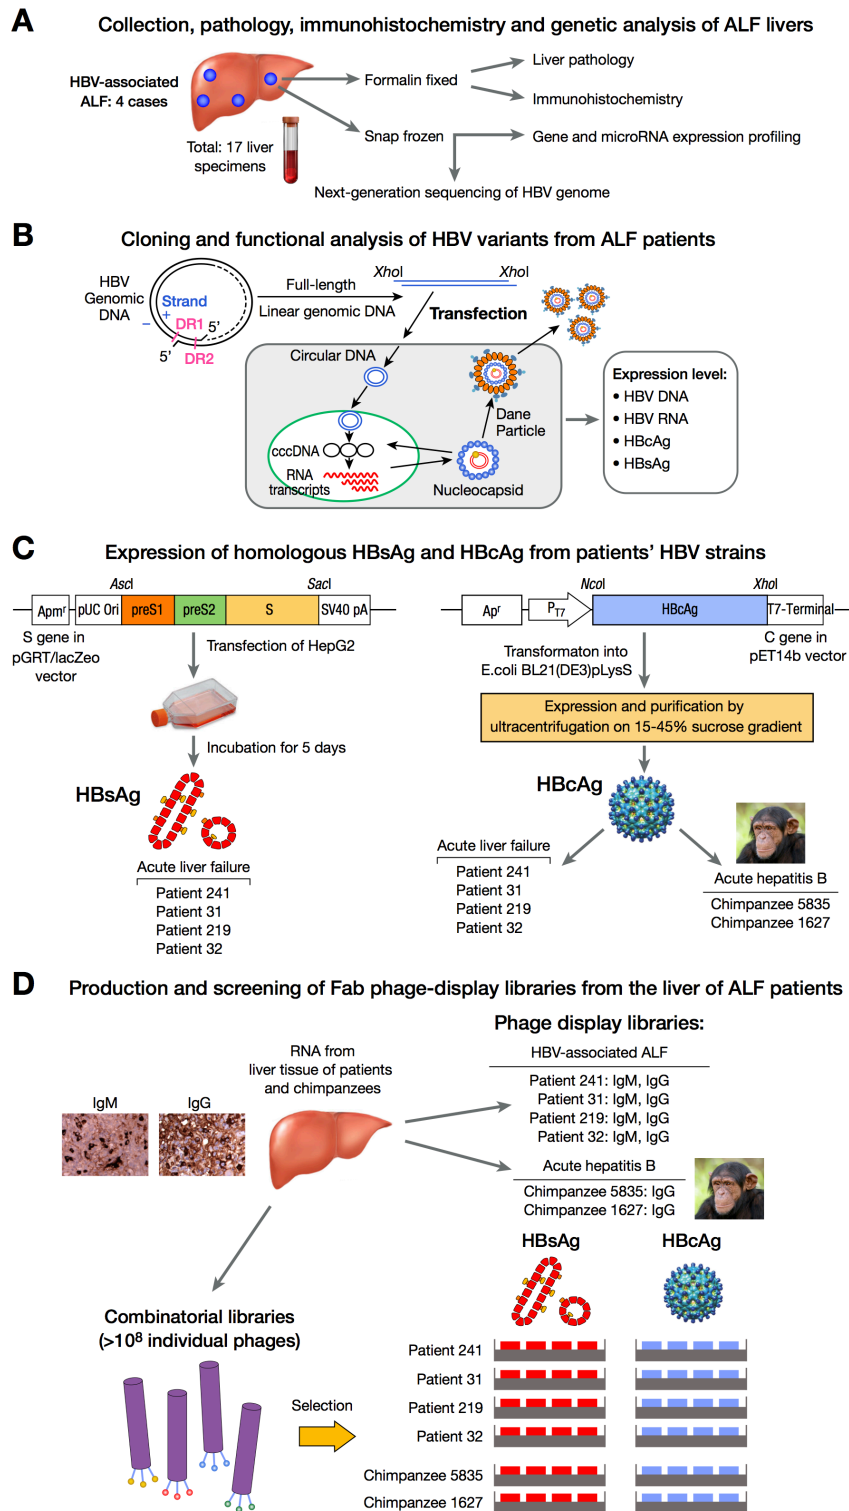

**Fig. S1.** Study design. (A) At the time of liver transplantation, we obtained serum and 4 or 5 liver specimens from each of the 4 patients with ALF. Each liver specimen was divided into two pieces: one was formalin-fixed and paraffin-embedded and the other was snap frozen. Fixed liver tissue was used for pathological examination and immunohistochemistry. Snap-frozen samples were stored at  $-80\text{ }^{\circ}\text{C}$  for molecular studies, including mRNA and microRNA expression profiling, next-generation sequencing, and phage-display library. Liver gene and microRNA expression profiling was performed on multiple liver specimens from each patient with ALF and from controls with normal liver. Full genome HBV next-generation sequencing was performed both on serum and liver of each patient with ALF. (B) Linear full-length HBV genomic DNA with XhoI adhesive sites at both terminal ends was transfected into human hepatoma cells HepG2 (20). Upon transfection, the HBV replication cycle from the nuclear generation of viable cccDNA to the final production of infectious viral particles was fully recapitulated; (21) the expression level of viral DNA and RNA and viral proteins was determined following transfection. (C) Based on HBV sequences obtained from each patient with ALF, 2.2-kb gene fragments corresponding to nucleotides 2705 to 1745 of HBV and containing the entire preS1/preS2/S genomic region were synthesized and expressed in HepG2 cells. Likewise, 552 Kb gene fragments corresponding to nucleotides 1901 to 2451, including the gene coding for HBcAg from each ALF patient and from two chimpanzees with acute self-limited hepatitis were synthesized and expressed in *E. coli*. (D) Eight phage-display Fab libraries from patients with ALF, one IgG1 and one IgM from each patient, and one IgG1 phage display Fab library from each of the two chimpanzees with acute self-limited hepatitis were constructed using total RNA extracted from liver tissue. No IgM library was constructed from the two chimpanzees because PCR amplification of immunoglobulin  $\mu$ -chains was negative. The average size of each library was  $1 \times 10^8$  individual clones. For screening of the libraries, the IgG1 and IgM Fab libraries were separately panned by solid-phase selection by ELISA against the homologous or wild-type HBsAg and HBcAg.



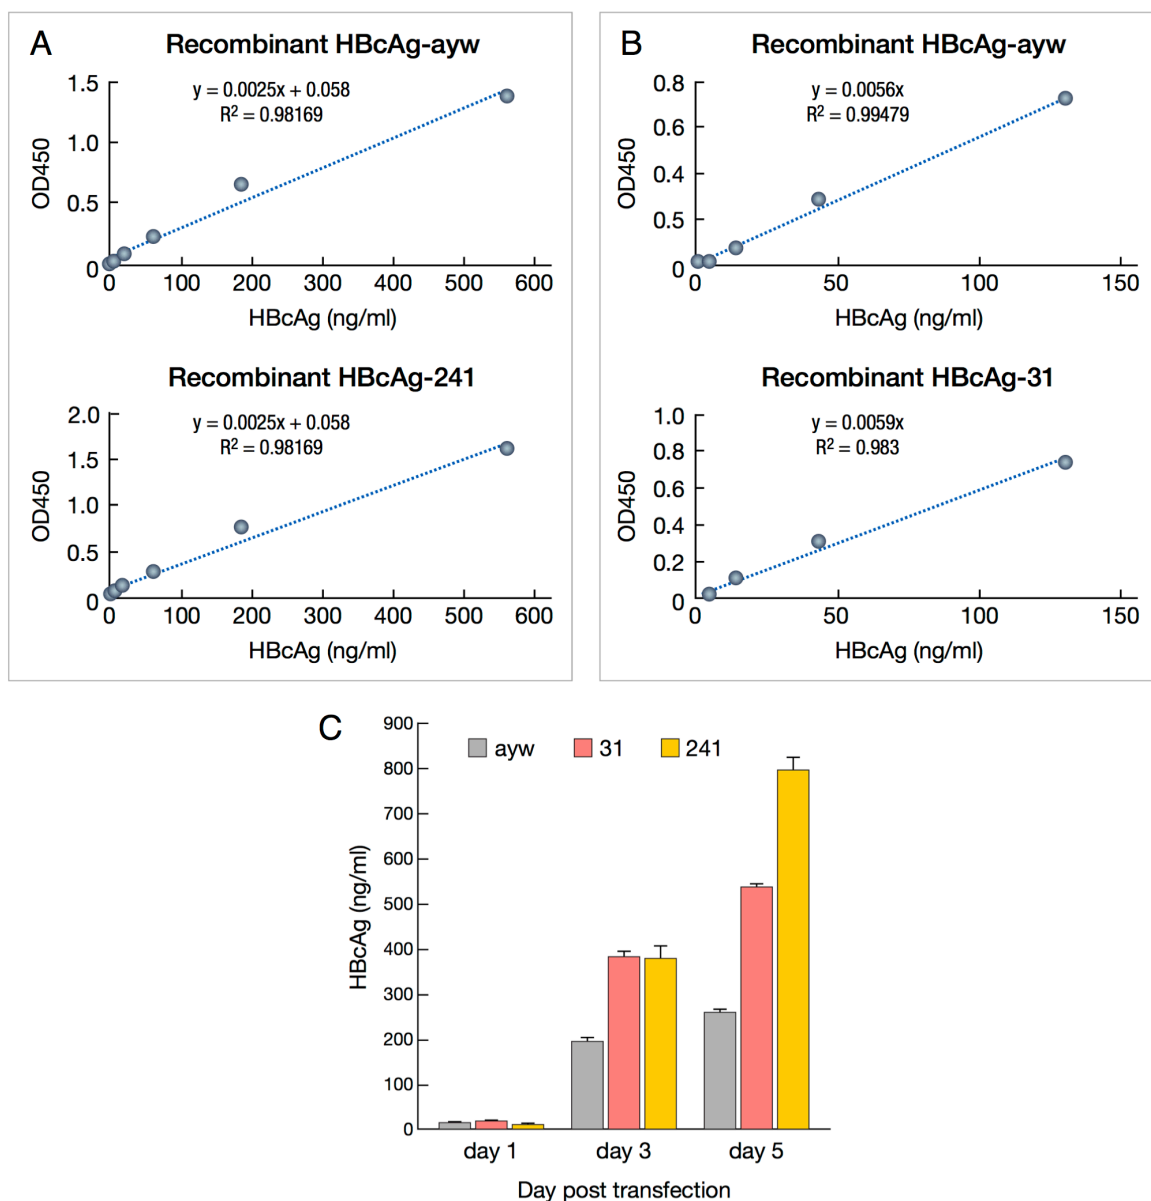

**Fig. S2.** Standard linear dose-response curves for recombinant HBcAg derived from ayw, 31 and 241 respectively, and kinetics of HBcAg expression in vitro. (A) Standard curves were used to calculate the concentration of HBcAg from ayw and 241. (B) Standard curves were used to calculate the concentration of HBcAg from ayw and 31. (C) A linear full-length replication-competent HBV DNA of ayw, 31 or 241 was transfected into HepG2 cells. The cells were collected on day 1, 3 and 5 post-transfection, and the core antigens were quantified by ELISA as described in the Methods section. Data are shown as mean  $\pm$  SE from two transfection experiments with independently prepared cells and DNA.

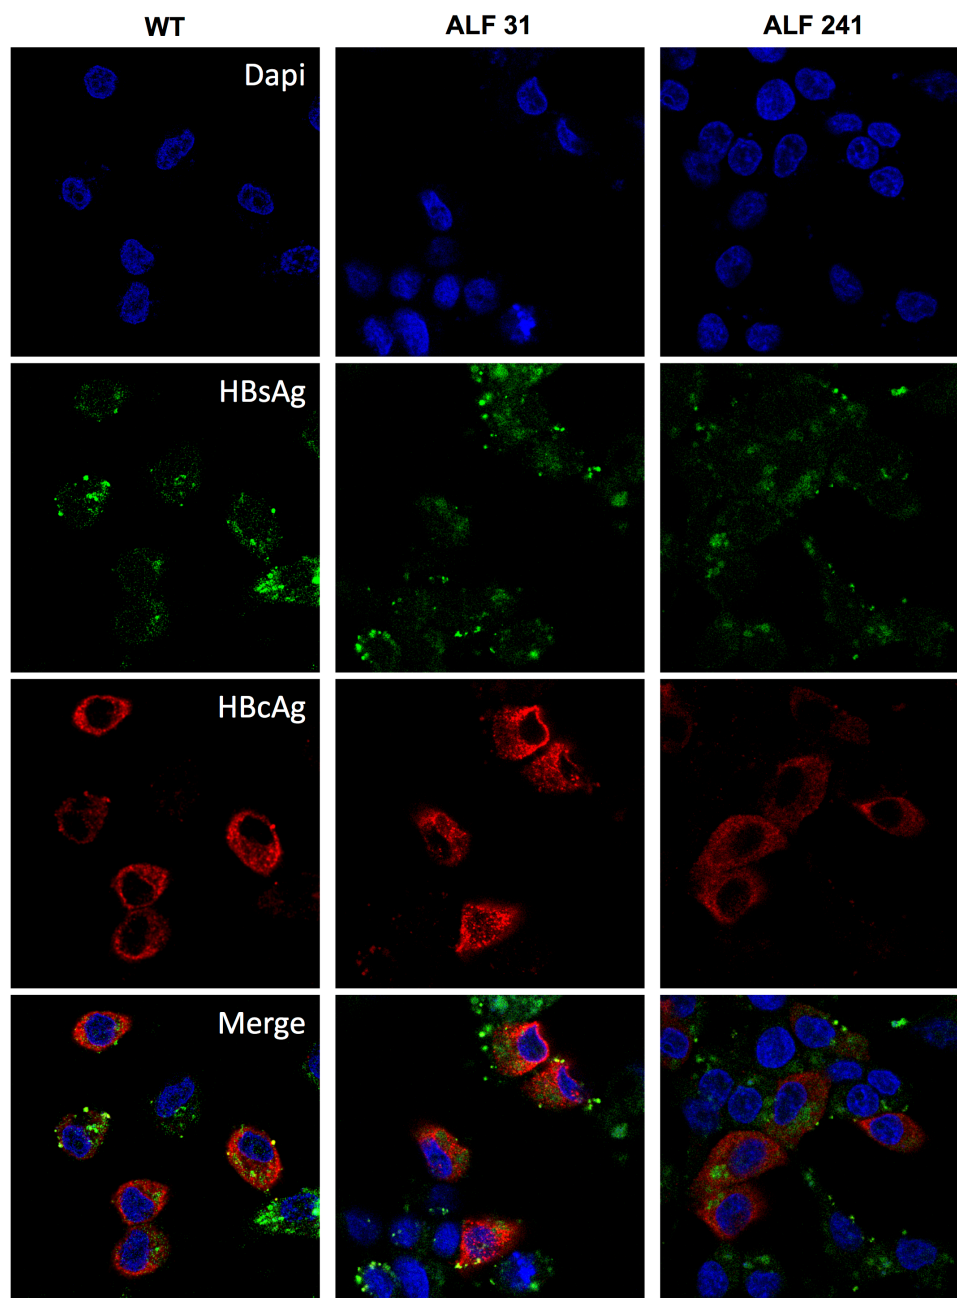

**Fig. S3.** Intracellular localization of hepatitis B surface antigen (HBsAg) and hepatitis B core antigen (HBcAg) in HepG2 cells analyzed by confocal microscopy. HepG2 cells were transfected with full-length, replication-competent linear DNA of wild-type HBV (ayw) or of two HBV strains derived from two representative patients with acute liver failure (ALF, Patients 31 and 241) and 48 hours later were fixed with paraformaldehyde. Nuclei are shown in blue (Dapi); HBsAg appears in green (Alexa 488) and HBcAg in red (Alexa 594). HBcAg staining is very intense in the cytoplasm of all HBV strains. Merged images are also shown at the bottom. Images are visualized at 63X magnification.

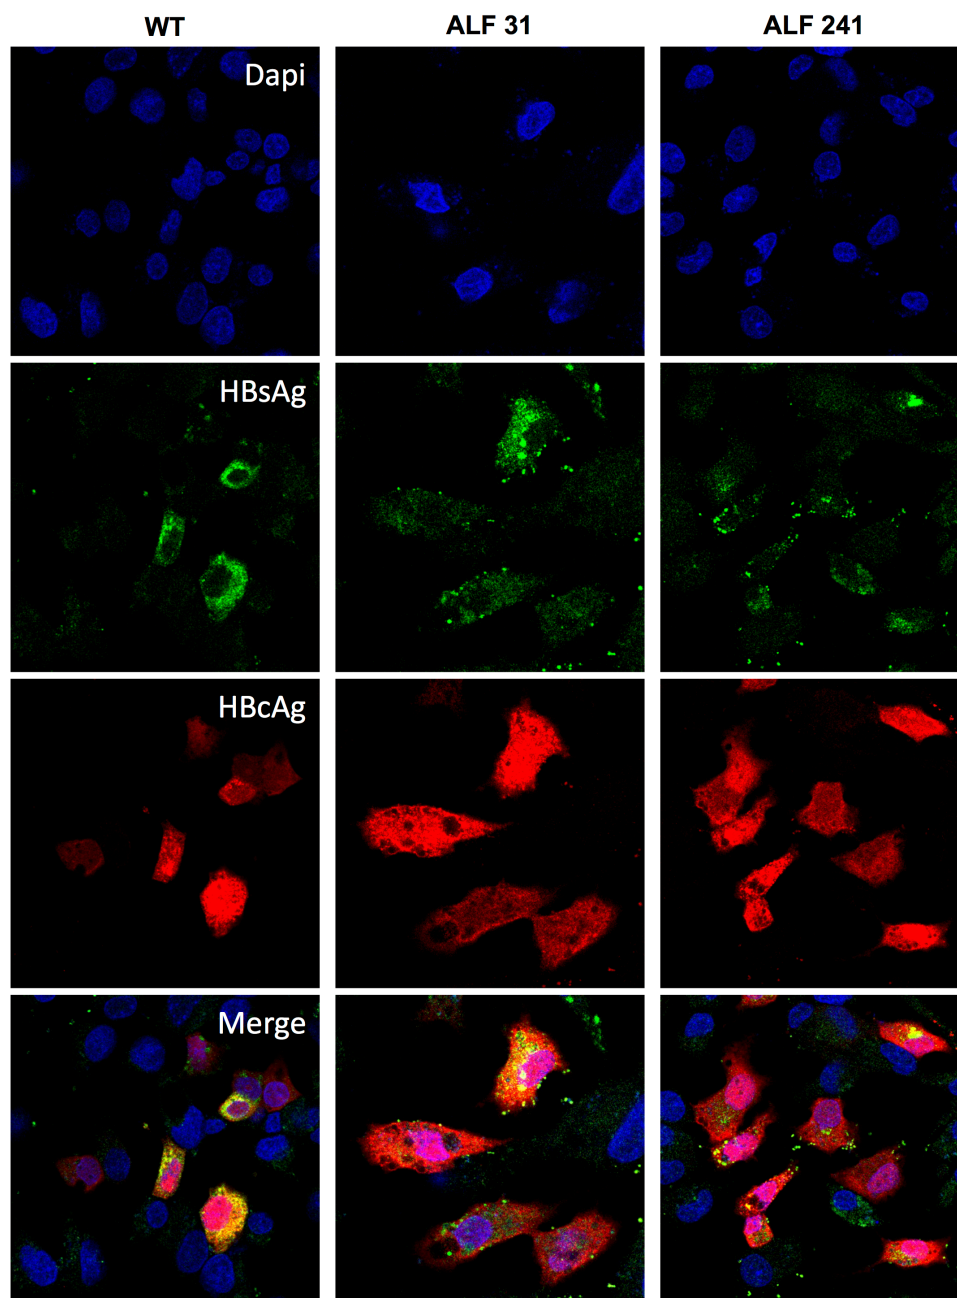

**Fig. S4.** Intracellular localization of hepatitis B surface antigen (HBsAg) and hepatitis B core antigen (HBcAg) in HepG2 cells analyzed by confocal microscopy. HepG2 cells were transfected with full-length, replication-competent linear DNA of wild-type HBV (ayw) or two HBV strains derived from two representative patients with acute liver failure (ALF, Patients 31 and 241) and 48 hours later were fixed, permeabilized and immunostained by indirect immunofluorescence. HBsAg appears in green (Alexa 488) and HBcAg in red (Alexa 594); nuclei are shown in blue (Dapi). Differential interference contrast (DIC) was used to show localization of the fluorescent signal on the plasma membrane and inside the cells. Merged images are shown at the bottom.

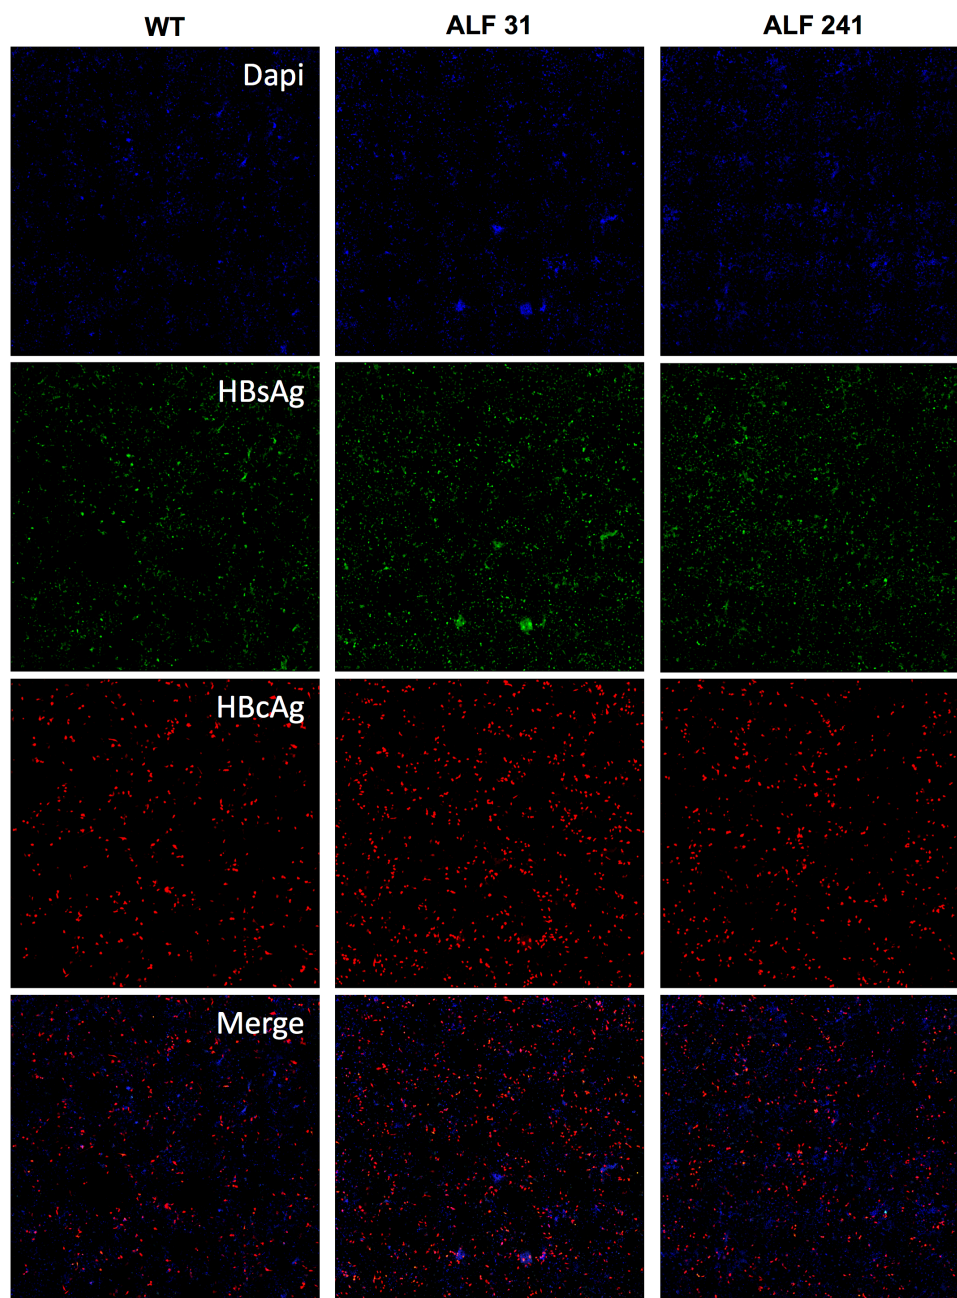

**Fig. S5.** Intracellular localization of hepatitis B surface antigen (HBsAg) and hepatitis B core antigen (HBcAg) in HepG2 cells analyzed by confocal microscopy. HepG2 cells were transfected with full-length, replication-competent linear DNA of wild-type HBV (ayw) or of two HBV strains derived from two representative patients with acute liver failure (ALF, Patients 31 and 241) and 48 hours later were fixed, permeabilized and immunostained by indirect immunofluorescence. Nuclei are shown in blue (Dapi); HBsAg appears in green (Alexa 488) and HBcAg in red (Alexa 594). Merged images are also shown at the bottom. The cells were visualized at low magnification (10X).

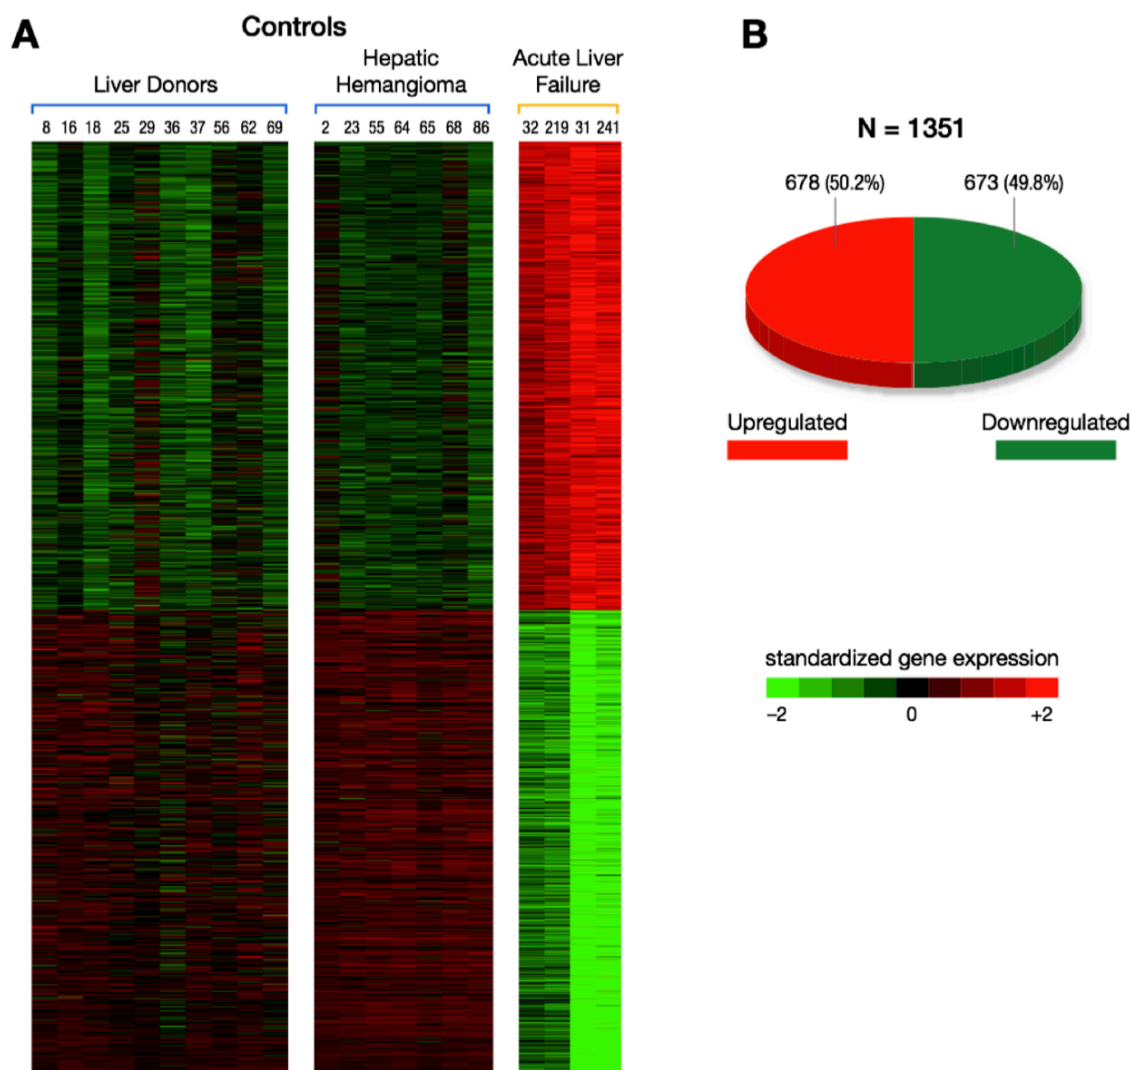

**Fig. S6.** Heatmap of genes differentially expressed between patients with acute liver failure and controls. (A) Heatmap of the 1,351 genes with a fold change greater than 3 differentially expressed between the four patients with acute liver failure and 17 controls, including 10 liver donors and 7 patients who underwent liver resection for hepatic hemangioma. Each column represents a single patient. Gene expression levels were log<sub>2</sub>-transformed and row-wise standardized. Up-regulated genes are shown in shades of red, down-regulated genes in shades of green. A gene expression gradient is evident between the two patients with massive necrosis (Patient 241 and 31) and the two with submassive necrosis (Patient 219 and 32). (B) Approximately half of the 1351 differentially expressed genes were upregulated and half downregulated.

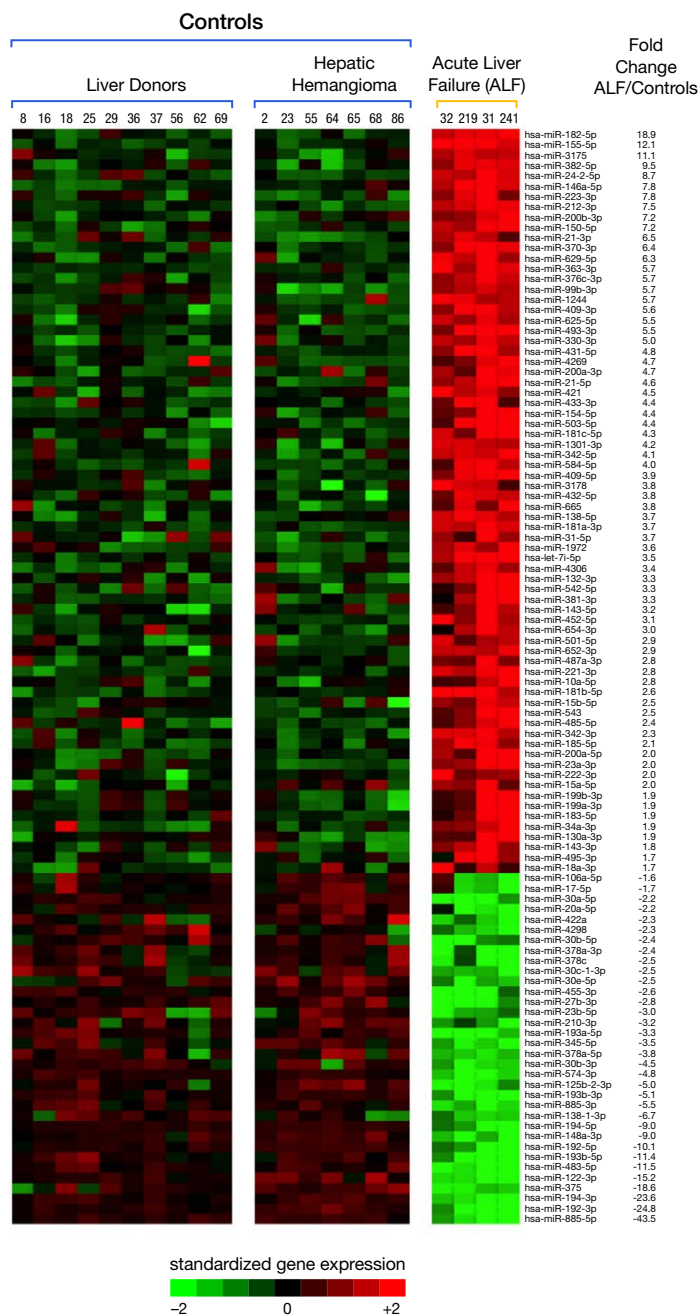

**Fig. S7.** Heatmap of microRNA differentially expressed between patients with acute liver failure and controls. Heatmap of mature microRNA differentially expressed between the four patients with acute liver failure and 17 controls. Each column represents a single patient. MicroRNA expression levels were log<sub>2</sub>-transformed and row-wise standardized. Up-regulated microRNAs are shown in shades of red, down-regulated genes in shades of green. Fold changes in expression between acute liver failure patients and controls are shown in the right column.

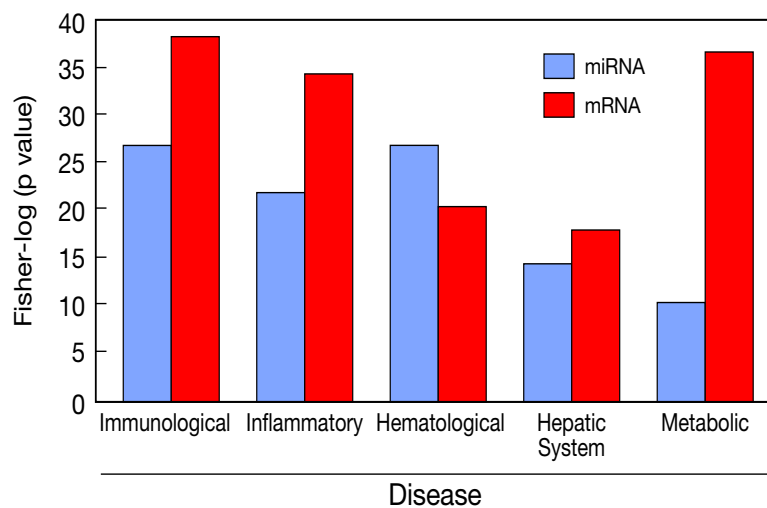

**Fig. S8.** Major disease categories significantly associated with mRNAs and miRNAs that were differentially expressed in patients with acute liver failure. The analysis shows a predominant immunological and inflammatory disease signature in acute liver failure. Except for metabolic diseases, a consistent correlation of mRNA and miRNA expressions is also evident.

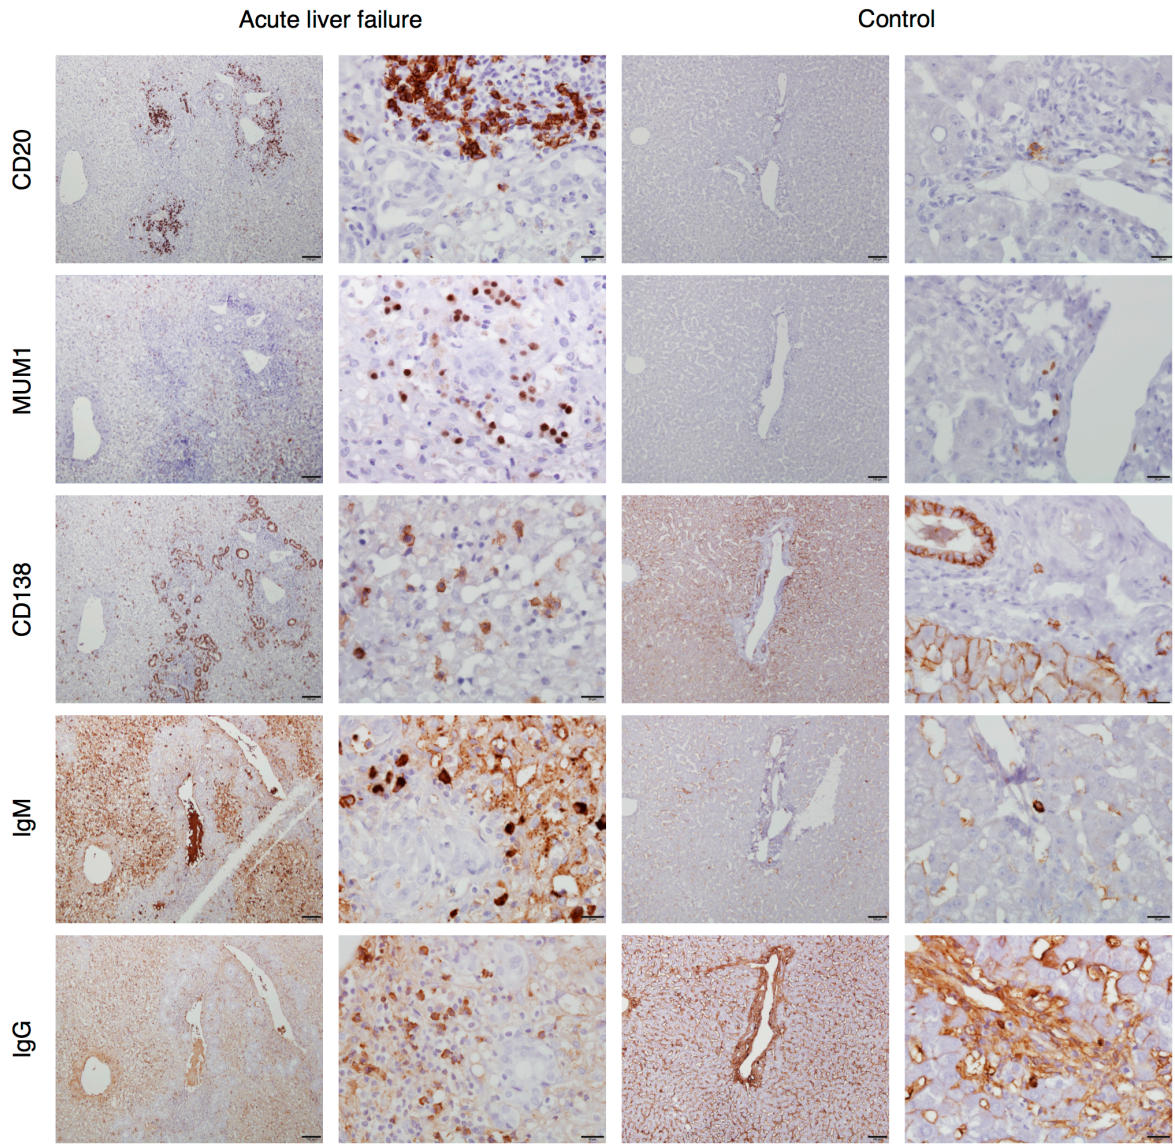

Fig. S9. Continued on the next page.



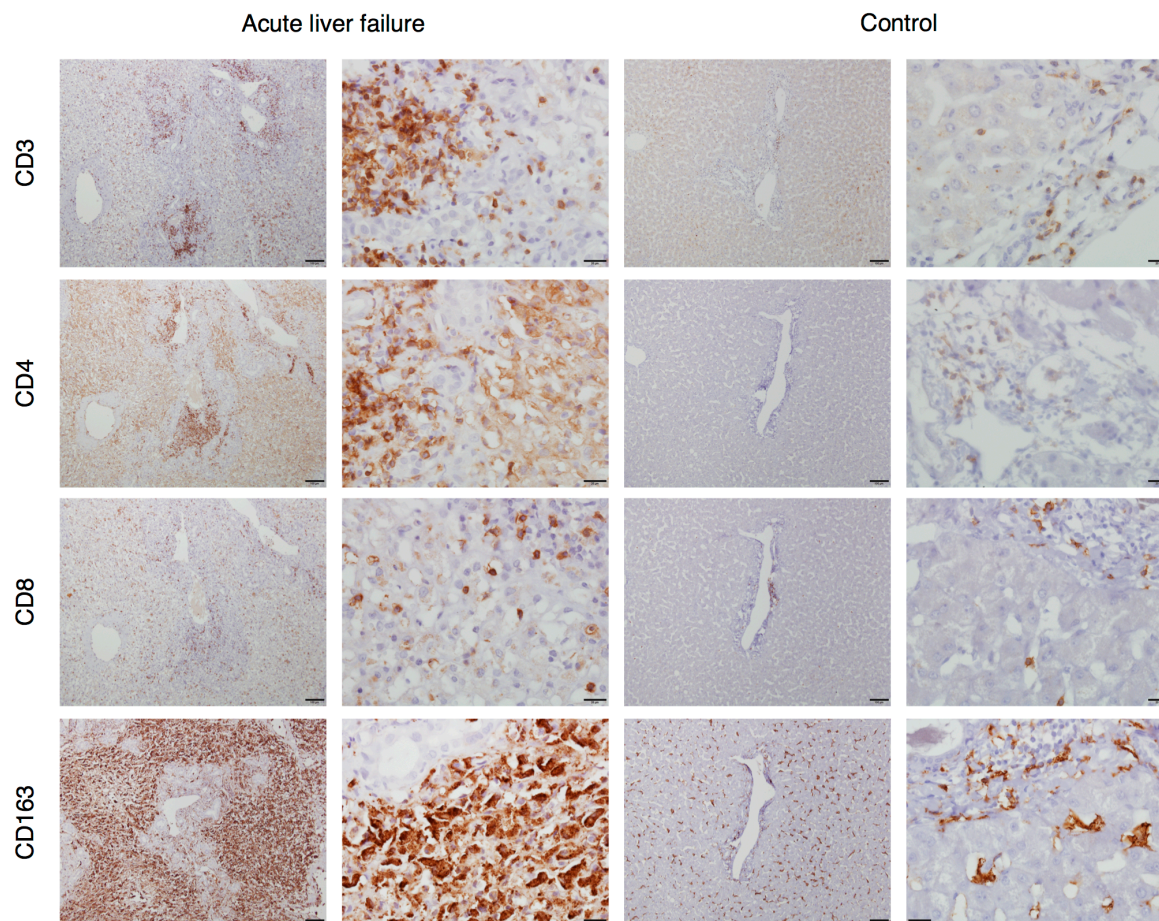

**Fig. S9.** Immunohistochemical staining of B-cell and T-cell lineage in liver tissue of a representative patient with massive hepatic necrosis at the time of liver transplantation, and of a representative control liver donor. Liver sections were stained with monoclonal antibodies against CD 20, MUM1/IRF4, CD138, IgM, IgG, CD3, CD4, CD8, and CD163. Images of liver sections at different magnification (left columns, 10X; right columns, 100X) show clusters of B cells in the portal tracts and single cells within the lobules. A strong nuclear staining for MUM1/IRF4 is seen in plasmacytoid cells and plasma cells, which extensively infiltrated the lobules. Plasma cells were also strongly positive for CD138, which stains the membrane and the cytoplasm. Positive staining for IgM-secreting mature plasma cells is seen predominantly within the lobules. A diffuse staining is also seen for IgG-secreting plasma cells. Staining for T-cell lineage markers show extensive infiltration of CD3-positive CD8-positive cells and few dispersed CD4-positive cells. Low level diffuse CD4 staining reflects the extensive tissue infiltration by macrophages. Staining for CD163 shows a massive infiltration of the liver tissue by macrophages. Sections from the control liver show only rare cells expressing B-cell and T-cell markers. Positive staining for CD163, IgM and IgG was limited and almost confined to the sinusoids.

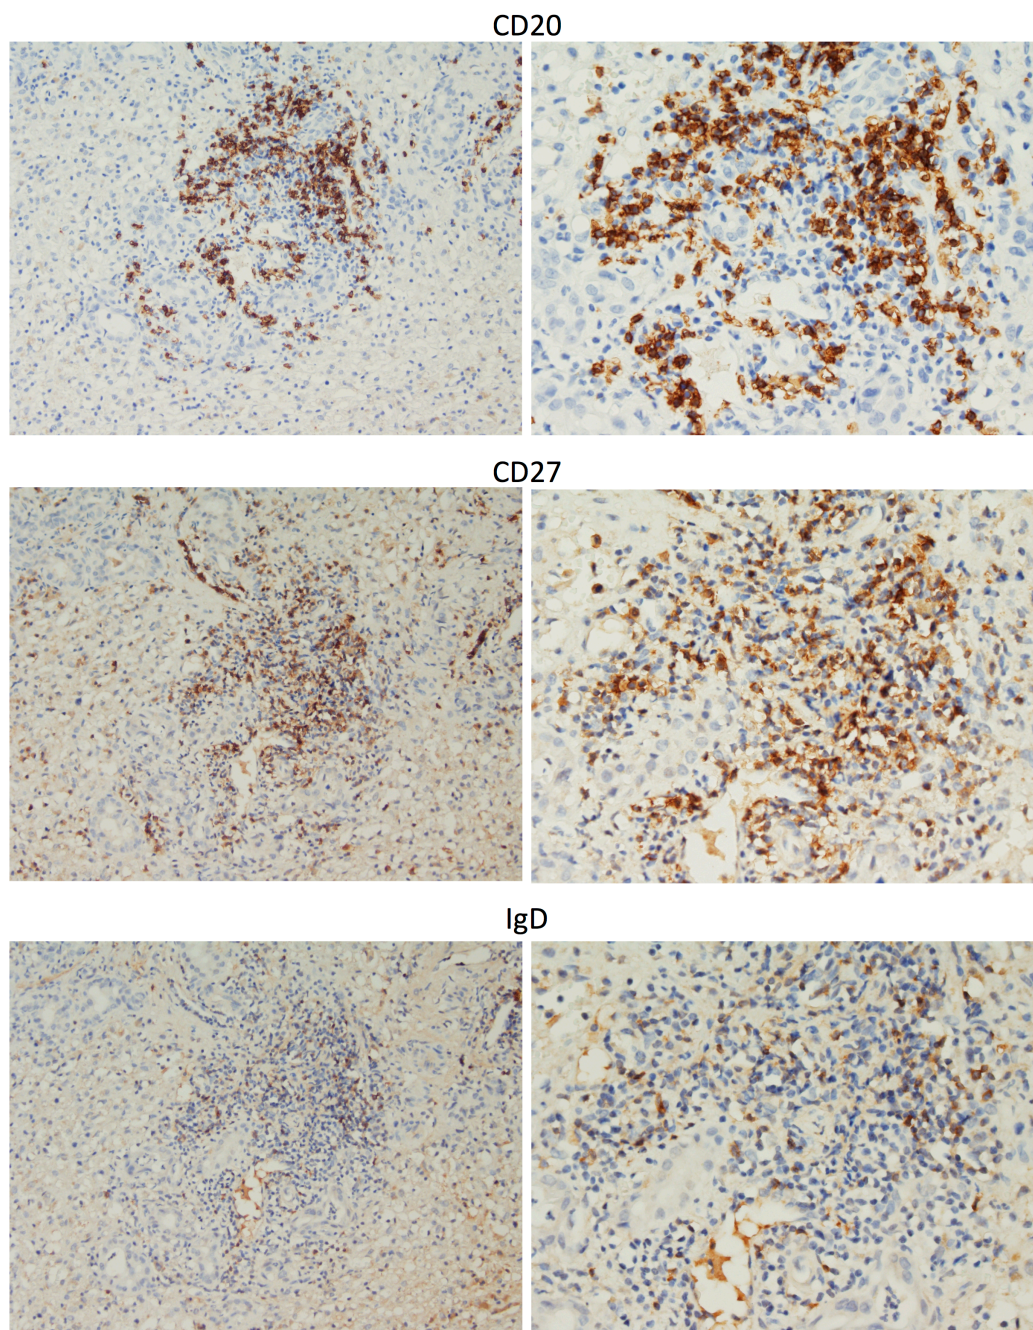

**Fig. S10.** Immunohistochemical staining for naïve B cells in liver tissue of a representative patient with massive hepatic necrosis at the time of liver transplantation. Liver sections were stained with monoclonal antibodies against CD 20, CD 27 and IgD. Images of liver sections at different magnification (20X and 40X). The negative staining for IgD and positive staining for CD27 indicate that the vast majority of intrahepatic B cells are not naïve.

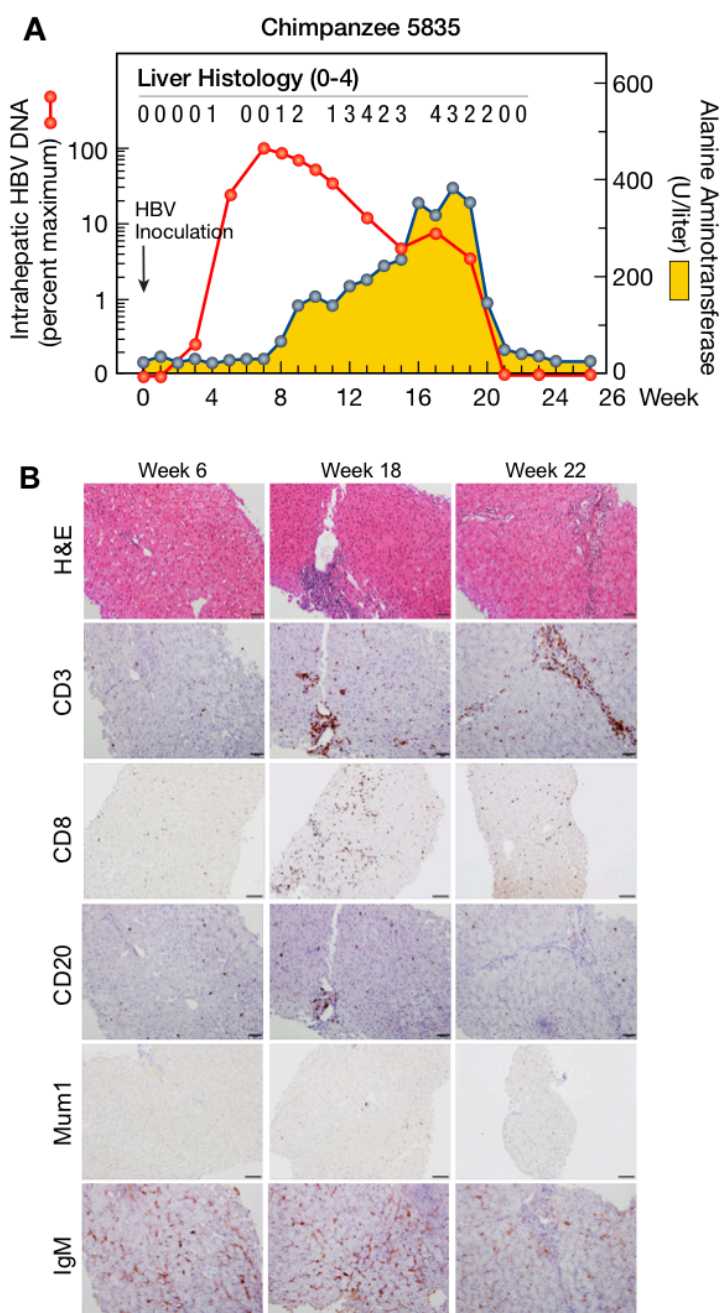

**Fig. S11.** Virologic and histopathologic course of acute hepatitis B in a chimpanzee infected with HBV. (A) Serum alanine aminotransferase and intrahepatic HBV DNA levels in a representative chimpanzee (no. 5835) inoculated with 108 genome equivalents of HBV strain ayw. The data on HBV DNA levels, expressed as percentage of the peak levels detected on week 6 (percent maximum), were previously reported by Wieland et al. (3). (B) immunohistochemical detection of T- and B-cell antigens in the liver of chimpanzee 5835 at three time points (week, 6, 18 and 22) during the course of acute self-limited hepatitis B. On week 18, there was extensive infiltration of CD3+CD8+ T cells, whereas CD20+ B cells, Mum+ and IgM+ plasma cells were rarely detected.

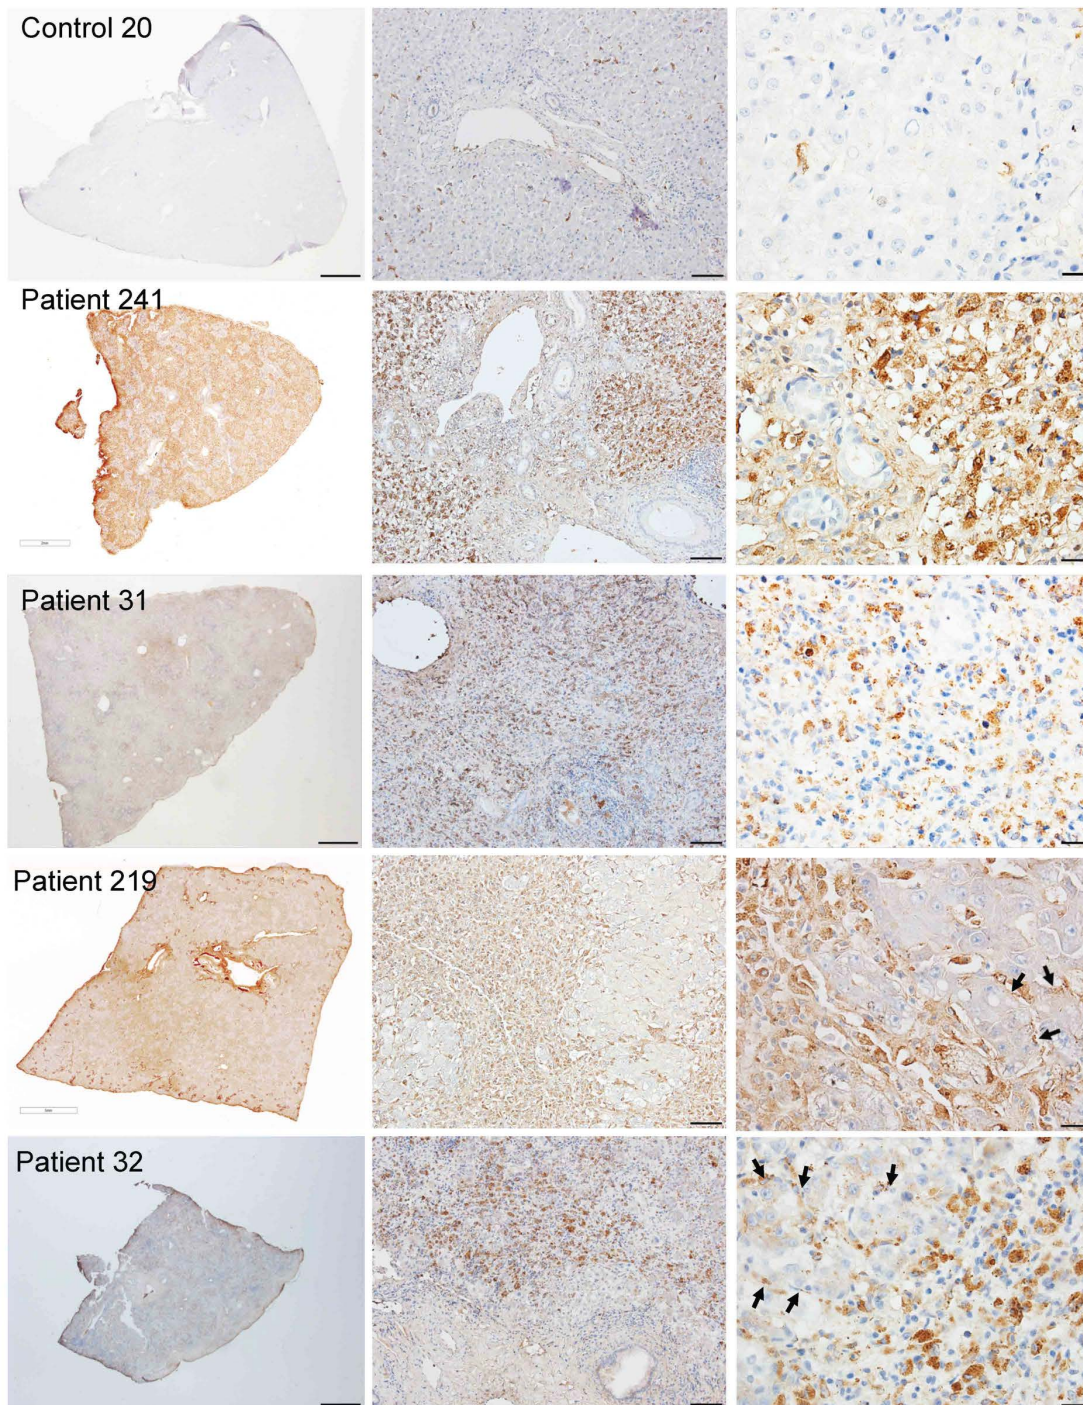

**Fig. S12.** Immunohistochemical staining of complement C1q in 4 patients with acute liver failure and in a representative control liver donor. Patient 241 and 31 had massive hepatic necrosis and Patient 219 and 32 had submassive hepatic necrosis. Images of liver sections at different magnification (1X, 10X and 40X, respectively, starting from the left column). Deposition of C1q is seen mainly within macrophage-like-cells, focally with a granular pattern suggestive of immune complexes, and in residual hepatocytes (arrows) showing a weak linear intercellular staining, suggesting plasma membrane deposition. Liver tissue from the control liver donor shows no significant staining for C1q.

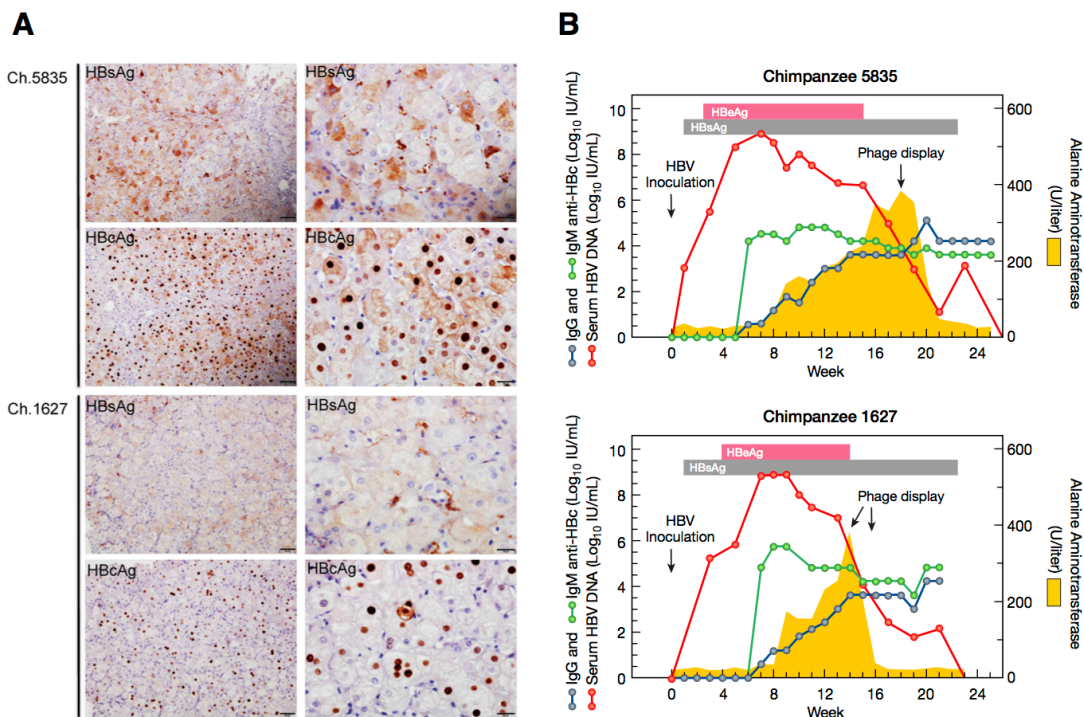

**Fig. S13.** Intrahepatic detection of HBsAg and HBcAg in two chimpanzees with acute, self-limited hepatitis B and timing of phage display library generation in the same chimpanzees. (A) The staining was performed at week 13 and at week 12 post-inoculation in chimpanzee 5835 and 1627, when their alanine aminotransferase values were 192U/L and 231U/L, respectively; their peak was reached at week 18 (384 U/L) and at week 14 (387U/L), respectively. HBsAg staining was diffusely positive in both chimpanzees (20X and 60X magnification). HBcAg was strongly positive in the nuclei of both animals with a diffuse cytoplasmic staining in one (chimpanzee 5835), while only one hepatocyte was positive for both nuclear and cytoplasmic staining in the second animal (chimpanzee 1627), as shown by 20X and 60X magnification. (B) The time point in which phage display libraries were generated are indicated by the arrows in relation to the clinical, serologic, and virologic course of acute HBV infection in two experimentally infected chimpanzees.



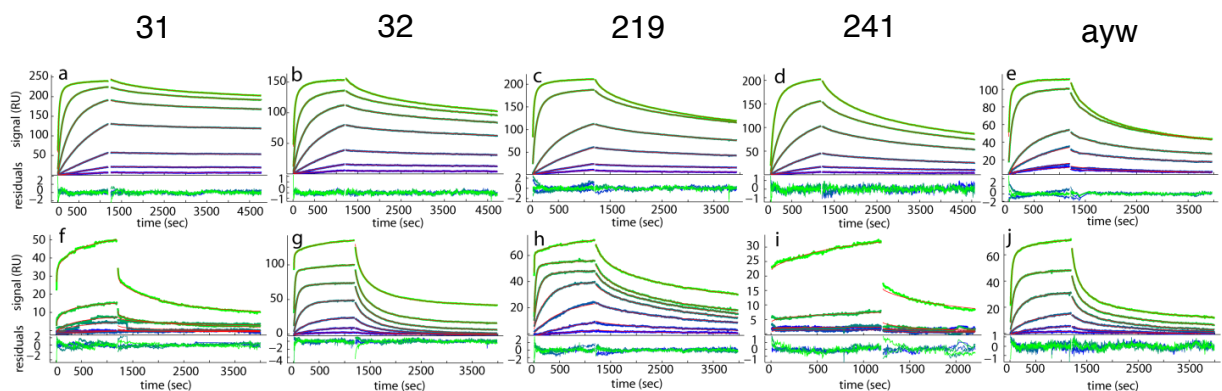

**Fig. S15.** Representative sensograms showing binding of monoclonal antibodies from a patient with HBV-associated acute liver failure (Fab G3; top panels) and from a chimpanzee with acute hepatitis B (Fab F8; bottom panels) to various HBcAg proteins immobilized on different sensor surfaces. Binding data (blue to green) and best-fit (red lines, superimposed by the blue/green lines) from the affinity and kinetic rate constant distribution model. For each panel, the binding traces and best-fits are shown on the top and the residuals of the fits are shown on the bottom. (A, F) HBcAg derived from patient 31; (B, G) HBcAg derived from patient 32; (C, H) HBcAg derived from patient 219; (D, I) HBcAg derived from patient 241; (E, J) HBcAg derived from wild-type ayw (8).

**Table S1.** Virologic features in four patients with HBV-associated acute liver failure

| Variable                           | Massive Hepatic Necrosis |            |              |           | Submassive Hepatic Necrosis |            |              |           |
|------------------------------------|--------------------------|------------|--------------|-----------|-----------------------------|------------|--------------|-----------|
|                                    | Patient 241              |            | Patient 31   |           | Patient 219                 |            | Patient 32   |           |
|                                    | On Admission             | Before     | On Admission | Before    | On                          | Before     | On Admission | Before    |
| HBsAg                              | Positive                 | Negative   | Positive     | Positive  | Positive                    | Negative   | Borderline   | Negative  |
| Concentration ( $\mu\text{g/mL}$ ) |                          | 0          |              | 1.74      |                             | 0          |              | 0         |
| Anti-HBs (mIU/mL)                  | 0.6                      | 67.7       | 0            | 0         | 15.3                        |            | 5.9          | 8.0       |
| Anti-HBc                           | Positive                 | Positive   | Positive     | Positive  | Positive                    | Positive   | Positive     | Positive  |
| Titer                              |                          | 1:400      |              | 1:128     |                             | 1:40       |              | 1:256     |
| IgM anti-HBc                       | Positive                 | Positive   | Positive     | Positive  | Positive                    | Positive   | Positive     | Positive  |
| Titer                              |                          | 1: 524,288 |              | 1:524,288 |                             | 1: 524,288 |              | 1:524,288 |
| HBeAg                              | NA                       | Negative   | Negative     | Negative  | Positive                    |            | Negative     | Negative  |
| Anti-HBe                           | NA                       | Positive   | Borderline   | Positive  | Positive                    |            | Positive     | Positive  |
| Serum HBV DNA ( $\log_{10}$ IU/mL) | 2.88                     | 2.46       |              | 5.34      | 4.29                        |            | 5.27         | 3.88      |
| Liver HBV DNA ( $\log_{10}$ IU/ng) |                          | 3.31       |              | 3.69      |                             | 1.29       |              | 2.58      |
| Liver HBV RNA ( $\log_{10}$ IU/ng) |                          | 2.14       |              | 2.35      |                             | 0.81       |              | 2.14      |

NA, denotes not available.



**Table S2.** Representative Anti-HBc IgG and IgM Titers in Four Patients with Classic Acute HBV Infection

| <b>Acute Hepatitis B</b> | <b>Anti-HBc Titers</b> |            |
|--------------------------|------------------------|------------|
|                          | <b>IgM</b>             | <b>IgG</b> |
| HBV monoinfected         |                        |            |
| Patient 1                | 1:41,943               | 1:64       |
| Patient 2                | Borderline             | 1:64       |
| HBV / HCV Co-Infected    |                        |            |
| Patient 3                | 1:4,096                | 1:128      |
| Patient 4                | 1:32,768               | 1:8        |

**Table S3.** Demographic, clinical and pathological data of liver donors and subjects undergoing liver resection for hepatic hemangioma

| <b>Patient no.</b>                         | <b>Sex</b> | <b>Age</b> | <b>ALT</b> | <b>AST</b> | <b>GGT</b> | <b>Liver Pathology</b>                 |
|--------------------------------------------|------------|------------|------------|------------|------------|----------------------------------------|
| <b>Liver donors</b>                        |            |            |            |            |            |                                        |
| 8                                          | M          | 22         | 49         | 43         | 25         | Mild fatty change                      |
| 16                                         | F          | 44         | 18         | 20         | 16         | Very scanty fat                        |
| 18                                         | M          | 47         | 16         | 24         | 13         | Mild fatty change                      |
| 25                                         | F          | 66         | 19         | 16         | 52         | Mild fatty change                      |
| 29                                         | M          | 26         | 28         | 39         | 20         | Normal                                 |
| 36                                         | M          | 12         | 14         | 12         | 15         | Normal                                 |
| 37                                         | F          | 35         | 27         | 50         | 17         | Normal                                 |
| 56                                         | M          | 32         | 40         | 41         | 22         | Normal                                 |
| 62                                         | M          | 25         | 13         | 25         | 51         | Mild portal inflammation               |
| 69                                         | F          | 74         | 8          | 20         | NA         | NA                                     |
| <b>Patients undergoing liver resection</b> |            |            |            |            |            |                                        |
| 2                                          | F          | 27         | 26         | 14         | 27         | Normal with mild sinusoidal dilatation |
| 23                                         | F          | 61         | 14         | 17         | 18         | Normal                                 |
| 55                                         | F          | 59         | 13         | 13         | 58         | Normal                                 |
| 64                                         | F          | 48         | 12         | 19         | 17         | Normal                                 |
| 64                                         | F          | 48         | 12         | 19         | 17         | Normal                                 |
| 65                                         | M          | 44         | 26         | 18         | 27         | Normal                                 |
| 68                                         | F          | 49         | 17         | 21         | 22         | Very scanty fat                        |
| 86                                         | F          | 32         | 11         | 17         | 28         | Normal                                 |

The demographic and clinical data of liver donor 8, 16, 18, 29, 37 and 62, and all patients undergoing liver resection for hepatic hemangioma were previously published (9). NA, denotes not available.

**Table S4.** Synonymous and nonsynonymous mutations in the entire HBV genome in each of the four patients with acute liver failure

| <b>Massive hepatic necrosis: Patient 241</b> |               |                          |               |                 |
|----------------------------------------------|---------------|--------------------------|---------------|-----------------|
| <b>Nucleotide Position*</b>                  | <b>Change</b> | <b>Amino Acid Change</b> | <b>Region</b> | <b>Position</b> |
| 1839                                         | T to C        | Ile to Thr               | preC          | 9               |
| 1896                                         | G to A        | Trp to stop              | preC          | 28              |
| 1899                                         | G to A        | Gly to Asp               | preC          | 29              |
| 1909                                         | C to T        | Syn.                     | Core          | 3               |
| 1933                                         | T to C        | Syn.                     | Core          | 11              |
| 1934                                         | A to T        | Thr to Ser               | Core          | 12              |
| 1951                                         | G to A        | Syn.                     | Core          | 17              |
| 1962                                         | C to A        | Ser to Tyr               | Core          | 21              |
| 2003                                         | T to A        | Ser to Thr               | Core          | 35              |
| 2009                                         | C to T        | Syn.                     | Core          | 37              |
| 2013                                         | A to T        | Tyr to Phe               | Core          | 38              |
| 2020                                         | A to T        | Glu to Asp               | Core          | 40              |
| 2041                                         | T to C        | Syn.                     | Core          | 47              |
| 2047                                         | A to G        | Syn.                     | Core          | 49              |
| 2080                                         | T to C        | Syn.                     | Core          | 60              |
| 2093                                         | C to T        | Syn.                     | Core          | 65              |
| 2121                                         | T to G        | Val to Gly               | Core          | 74              |
| 2136                                         | C to A        | Pro to Gln               | Core          | 79              |
| 2138                                         | G to A        | Ala to Thr               | Core          | 80              |
| 2140                                         | G to A        | Ala to Thr               | Core          | 80              |
| 2155                                         | A to G        | Syn.                     | Core          | 85              |
| 2174                                         | A to C        | Asn to His               | Core          | 92              |
| 2198                                         | C to A        | Leu to Ile               | Core          | 100             |
| 2226                                         | C to T        | Thr to Ile               | Core          | 109             |
| 2227                                         | T to A        | Thr to Ile               | Core          | 109             |
| 2287                                         | T to C        | Syn.                     | Core          | 129             |
| 2289                                         | C to A        | Pro to Gln               | Core          | 130             |
| 2335                                         | G to A        | Syn.                     | Core          | 145             |
| 2336                                         | A to T        | Thr to Cys               | Core          | 146             |
| 2337                                         | C to G        | Thr to Cys               | Core          | 146             |
| 2429                                         | C to A        | Gln to Lys               | Core          | 177             |
| 2431                                         | A to G        | Gln to Lys               | Core          | 177             |
| 2925                                         | C to T        | Syn.                     | preS1         | 26              |
| 2934                                         | T to C        | Syn.                     | preS1         | 29              |
| 3013                                         | T to C        | Phe to Leu               | preS1         | 56              |
| 3036                                         | T to G        | Syn.                     | preS1         | 63              |
| 3051                                         | T to C        | Syn.                     | preS1         | 68              |

| <b>Nucleotide Position*</b> | <b>Change</b> | <b>Amino Acid Change</b> | <b>Region</b> | <b>Position</b> |
|-----------------------------|---------------|--------------------------|---------------|-----------------|
| 3154                        | A to G        | Asn to Asp               | preS1         | 103             |
| 3159                        | T to C        | Syn.                     | preS1         | 104             |
| 53                          | T to C        | Phe to Leu               | preS2         | 22              |
| 96                          | T to C        | Leu to Pro               | preS2         | 36              |
| 105                         | C to T        | Ala to Val               | preS2         | 39              |
| 148                         | G to A        | Syn.                     | preS2         | 53              |
| 286                         | A to G        | Syn.                     | S             | 44              |
| 346                         | T to C        | Syn.                     | S             | 64              |
| 355                         | A to G        | Syn.                     | S             | 67              |
| 400                         | C to A        | Syn.                     | S             | 82              |
| 466                         | G to A        | Syn.                     | S             | 104             |
| 499                         | A to C        | Syn.                     | S             | 115             |
| 568                         | C to T        | Syn.                     | S             | 138             |
| 783                         | G to A        | Ser to Asn               | S             | 210             |
| 784                         | T to C        | Ser to Asn               | S             | 210             |
| 804                         | C to T        | Pro to Leu               | S             | 217             |
| 813                         | T to A        | Phe to Tyr               | S             | 220             |
| 1613                        | G to A        | Syn.                     | X             | 80              |
| 1634                        | A to T        | Gln to His               | X             | 87              |
| 1635                        | A to G        | Ile to Val               | X             | 88              |
| 1676                        | A to T        | Syn.                     | X             | 101             |
| 1753                        | T to C        | Ile to Thr               | X             | 127             |
| 1757                        | G to A        | Syn.                     | X             | 128             |
| 1799                        | C to G        | Syn.                     | X             | 142             |
| 2335                        | G to A        | Arg to Asn               | P             | 10              |
| 2336                        | A to T        | Arg to Asn               | P             | 10              |
| 2337                        | C to G        | Leu to Val               | P             | 11              |
| 2429                        | C to A        | Syn.                     | P             | 41              |
| 2431                        | A to G        | Asn to Ser               | P             | 42              |
| 2483                        | T to C        | Syn.                     | P             | 59              |
| 2575                        | A to C        | Lys to Thr               | P             | 90              |
| 2609                        | T to C        | Syn.                     | P             | 101             |
| 2645                        | C to A        | Syn.                     | P             | 113             |
| 2708                        | A to G        | Syn.                     | P             | 134             |
| 2925                        | C to T        | His to Tyr               | P             | 207             |
| 2934                        | T to C        | Ser to Pro               | P             | 210             |
| 3013                        | T to C        | Phe to Ser               | P             | 236             |
| 3036                        | T to G        | Phe to Val               | P             | 244             |
| 3051                        | T to C        | Ser to Pro               | P             | 248             |
| 3154                        | A to G        | Lys to Arg               | P             | 283             |
| 3159                        | T to C        | Ser to Pro               | P             | 285             |

| <b>Nucleotide Position*</b> | <b>Change</b> | <b>Amino Acid Change</b> | <b>Region</b> | <b>Position</b> |
|-----------------------------|---------------|--------------------------|---------------|-----------------|
| 53                          | T to C        | Phe to Ser               | P             | 310             |
| 96                          | T to C        | Syn.                     | P             | 323             |
| 105                         | C to T        | Syn.                     | P             | 326             |
| 143                         | G to A        | Ala to Thr               | P             | 342             |
| 286                         | A to G        | Asn to Asp               | P             | 388             |
| 346                         | T to C        | Syn.                     | P             | 408             |
| 355                         | A to G        | Asn to Asp               | P             | 411             |
| 400                         | C to A        | Leu to Ile               | P             | 426             |
| 466                         | G to A        | Ala to Thr               | P             | 448             |
| 499                         | A to C        | Asn to His               | P             | 459             |
| 568                         | C to T        | Syn.                     | P             | 482             |
| 783                         | G to A        | Syn.                     | P             | 553             |
| 784                         | T to C        | Ser to Pro               | P             | 554             |
| 804                         | C to T        | Syn.                     | P             | 560             |
| 813                         | T to A        | Syn.                     | P             | 563             |
| 926                         | T to G        | Ile to Arg               | P             | 601             |
| 948                         | T to C        | Syn.                     | P             | 608             |
| 961                         | A to G        | Ile to Val               | P             | 613             |
| 1050                        | G to T        | Syn.                     | P             | 642             |
| 1053                        | G to A        | Syn.                     | P             | 643             |
| 1060                        | T to C        | Syn.                     | P             | 646             |
| 1068                        | A to C        | Syn.                     | P             | 648             |
| 1293                        | T to C        | Syn.                     | P             | 723             |
| 1613                        | G to A        | Arg to Lys               | P             | 830             |

### **Massive hepatic necrosis: Patient 31**

| <b>Nucleotide Position*</b> | <b>Change</b> | <b>Amino Acid Change</b> | <b>Region</b> | <b>Position</b> |
|-----------------------------|---------------|--------------------------|---------------|-----------------|
| 1896                        | G to A        | Trp to stop              | preC          | 28              |
| 1934                        | A to T        | Thr to Ser               | Core          | 12              |
| 1962                        | C to A        | Ser to Tyr               | Core          | 21              |
| 1984                        | A to C        | Syn.                     | Core          | 28              |
| 2013                        | A to T        | Tyr to Phe               | Core          | 38              |
| 2020                        | A to T        | Glu to Asp               | Core          | 40              |
| 2026                        | A to G        | Syn.                     | Core          | 42              |
| 2045                        | T to A        | Ser to Thr               | Core          | 49              |
| 2063                        | C to A        | Leu to Ile               | Core          | 55              |
| 2075                        | A to G        | Ile to Val               | Core          | 59              |
| 2089                        | G to A        | Syn.                     | Core          | 63              |
| 2092                        | A to G        | Syn.                     | Core          | 64              |
| 2093                        | C to T        | Syn.                     | Core          | 65              |

| <b>Nucleotide Position*</b> | <b>Change</b> | <b>Amino Acid Change</b> | <b>Region</b> | <b>Position</b> |
|-----------------------------|---------------|--------------------------|---------------|-----------------|
| 2134                        | T to C        | Syn.                     | Core          | 78              |
| 2136                        | C to A        | Pro to Gln               | Core          | 79              |
| 2138                        | G to C        | Ala to Pro               | Core          | 80              |
| 2140                        | G to A        | Ala to Pro               | Core          | 80              |
| 2146                        | A to G        | Syn.                     | Core          | 82              |
| 2237                        | G to C        | Glu to Gln               | Core          | 113             |
| 2246                        | A to T        | Ile to Leu               | Core          | 116             |
| 2288                        | C to G        | Pro to Ala               | Core          | 130             |
| 2291                        | G to C        | Ala to Pro               | Core          | 131             |
| 2304                        | C to A        | Pro to Gln               | Core          | 135             |
| 2336                        | A to T        | Thr to Cys               | Core          | 146             |
| 2337                        | C to G        | Thr to Cys               | Core          | 146             |
| 2345                        | G to A        | Val to Ile               | Core          | 149             |
| 2441                        | T to C        | Ser to Pro               | Core          | 181             |
| 2862                        | T to G        | Syn.                     | preS1         | 5               |
| 2976                        | C to T        | Syn.                     | preS1         | 43              |
| 3012                        | T to G        | Syn.                     | preS1         | 55              |
| 3037                        | T to C        | Syn.                     | preS1         | 64              |
| 3135                        | G to T        | Syn.                     | preS1         | 96              |
| 3139                        | T to A        | Ser to Thr               | preS1         | 98              |
| 3147                        | T to C        | Syn.                     | preS1         | 100             |
| 3148                        | T to G        | Leu to Val               | preS1         | 101             |
| 3153                        | A to G        | Syn.                     | preS1         | 102             |
| 3154                        | A to G        | Asn to Asp               | preS1         | 103             |
| 43                          | A to G        | Syn.                     | preS2         | 18              |
| 53                          | T to C        | Phe to Leu               | preS2         | 22              |
| 78                          | G to A        | Gly to Glu               | preS2         | 30              |
| 96                          | T to C        | Leu to Pro               | preS2         | 36              |
| 100                         | T to C        | Syn.                     | preS2         | 37              |
| 111                         | C to A        | Pro to His               | preS2         | 41              |
| 273                         | A to G        | Asn to Ser               | S             | 40              |
| 288                         | C to A        | Thr to Asn               | S             | 45              |
| 289                         | T to C        | Thr to Asn               | S             | 45              |
| 346                         | T to C        | Syn.                     | S             | 64              |
| 355                         | A to G        | Syn.                     | S             | 67              |
| 400                         | C to A        | Syn.                     | S             | 82              |
| 445                         | T to G        | Syn.                     | S             | 97              |
| 499                         | A to C        | Syn.                     | S             | 115             |
| 520                         | G to A        | Syn.                     | S             | 122             |
| 528                         | T to C        | Met to Thr               | S             | 125             |
| 533                         | A to C        | Thr to Pro               | S             | 127             |

| <b>Nucleotide Position*</b> | <b>Change</b> | <b>Amino Acid Change</b> | <b>Region</b> | <b>Position</b> |
|-----------------------------|---------------|--------------------------|---------------|-----------------|
| 568                         | C to T        | Syn.                     | S             | 138             |
| 783                         | G to A        | Ser to Lys               | S             | 210             |
| 784                         | T to G        | Ser to Lys               | S             | 210             |
| 791                         | T to A        | Leu to Ile               | S             | 213             |
| 1404                        | C to A        | Pro to Thr               | X             | 11              |
| 1449                        | T to C        | Cys to Arg               | X             | 26              |
| 1635                        | A to G        | Ile to Val               | X             | 88              |
| 1676                        | A to T        | Syn.                     | X             | 101             |
| 1689                        | A to G        | Thr to Ala               | X             | 106             |
| 1752                        | A to C        | Ile to Leu               | X             | 127             |
| 1757                        | G to A        | Syn.                     | X             | 128             |
| 2336                        | A to T        | Arg to Ser               | P             | 10              |
| 2337                        | C to G        | Leu to Val               | P             | 11              |
| 2340                        | G to A        | Syn.                     | P             | 13              |
| 2441                        | T to C        | Syn.                     | P             | 45              |
| 2506                        | T to A        | Val to Glu               | P             | 67              |
| 2534                        | A to G        | Syn.                     | P             | 76              |
| 2549                        | T to C        | Syn.                     | P             | 81              |
| 2553                        | C to T        | His to Ser               | P             | 83              |
| 2554                        | A to C        | His to Ser               | P             | 83              |
| 2574                        | A to C        | Lys to Gln               | P             | 90              |
| 2578                        | A to G        | Lys to Arg               | P             | 91              |
| 2591                        | T to C        | Syn.                     | P             | 95              |
| 2636                        | T to C        | Syn.                     | P             | 110             |
| 2645                        | C to T        | Syn.                     | P             | 113             |
| 2662                        | T to G        | Val to Gly               | P             | 119             |
| 2666                        | C to T        | Syn.                     | P             | 120             |
| 2675                        | A to G        | Syn.                     | P             | 123             |
| 2756                        | T to G        | Syn.                     | P             | 150             |
| 2862                        | T to G        | Phe to Val               | P             | 186             |
| 2976                        | C to T        | Arg to Cys               | P             | 224             |
| 3012                        | T to G        | Phe to Val               | P             | 236             |
| 3042                        | G to A        | Val to Met               | P             | 246             |
| 3120                        | A to C        | Lys to Gln               | P             | 272             |
| 3139                        | T to A        | Val to Asp               | P             | 278             |
| 3154                        | A to G        | Lys to Arg               | P             | 283             |
| 42                          | G to A        | Syn.                     | P             | 306             |
| 43                          | A to G        | Arg to Gly               | P             | 307             |
| 53                          | T to C        | Phe to Ser               | P             | 310             |
| 78                          | G to A        | Syn.                     | P             | 318             |
| 96                          | T to C        | Syn.                     | P             | 324             |

| <b>Nucleotide Position*</b> | <b>Change</b> | <b>Amino Acid Change</b> | <b>Region</b> | <b>Position</b> |
|-----------------------------|---------------|--------------------------|---------------|-----------------|
| 100                         | T to C        | Tyr to His               | P             | 326             |
| 111                         | C to A        | Syn.                     | P             | 329             |
| 289                         | T to C        | Tyr to His               | P             | 389             |
| 346                         | T to C        | Syn.                     | P             | 408             |
| 355                         | A to G        | Asn to Asp               | P             | 411             |
| 400                         | C to A        | Leu to Ile               | P             | 426             |
| 445                         | T to G        | Ser to Ala               | P             | 441             |
| 499                         | A to C        | Asn to His               | P             | 459             |
| 520                         | G to C        | Asp to His               | P             | 466             |
| 533                         | A to C        | Tyr to Ser               | P             | 470             |
| 568                         | C to T        | Syn.                     | P             | 482             |
| 619                         | C to T        | Syn.                     | P             | 499             |
| 784                         | T to G        | Ser to Ala               | P             | 554             |
| 791                         | T to A        | Phe to Tyr               | P             | 556             |
| 801                         | T to A        | Syn.                     | P             | 559             |
| 814                         | T to C        | Syn.                     | P             | 564             |
| 842                         | A to C        | Asn to Thr               | P             | 573             |
| 862                         | T to C        | Tyr to His               | P             | 580             |
| 895                         | T to G        | Cys to Gly               | P             | 591             |
| 930                         | A to C        | Gln to His               | P             | 602             |
| 961                         | A to G        | Ile to Val               | P             | 613             |
| 978                         | T to C        | Syn.                     | P             | 618             |
| 1014                        | T to G        | Syn.                     | P             | 630             |
| 1023                        | C to T        | Syn.                     | P             | 633             |
| 1032                        | A to T        | Syn.                     | P             | 636             |
| 1044                        | T to C        | Syn.                     | P             | 640             |
| 1050                        | G to T        | Syn.                     | P             | 642             |
| 1053                        | G to A        | Syn.                     | P             | 643             |
| 1060                        | T to C        | Syn.                     | P             | 646             |
| 1134                        | C to T        | Syn.                     | P             | 669             |
| 1206                        | C to T        | Syn.                     | P             | 694             |
| 1249                        | T to C        | Ser to Leu               | P             | 709             |
| 1250                        | C to T        | Ser to Leu               | P             | 709             |
| 1272                        | T to C        | Syn.                     | P             | 716             |
| 1323                        | T to C        | Syn.                     | P             | 733             |
| 1350                        | A to C        | Syn.                     | P             | 742             |
| 1404                        | C to A        | Syn.                     | P             | 760             |
| 1449                        | T to C        | Syn.                     | P             | 775             |



**Submassive hepatic necrosis: Patient 219**

| <b>Nucleotide Position*</b> | <b>Change</b> | <b>Amino Acid Change</b> | <b>Region</b> | <b>Position</b> |
|-----------------------------|---------------|--------------------------|---------------|-----------------|
| 1828                        | C to A        | His to Gln               | preC          | 5               |
| 1896                        | G to A        | Trp to stop              | preC          | 28              |
| 1899                        | G to A        | Gly to Asp               | preC          | 29              |
| 1909                        | C to T        | Syn.                     | Core          | 3               |
| 1934                        | A to T        | Thr to Ser               | Core          | 12              |
| 2013                        | A to T        | Tyr to Phe               | Core          | 38              |
| 2038                        | G to A        | Syn.                     | Core          | 46              |
| 2041                        | T to C        | Syn.                     | Core          | 47              |
| 2053                        | C to T        | Syn.                     | Core          | 51              |
| 2075                        | A to G        | Ile to Ala               | Core          | 59              |
| 2076                        | T to C        | Ile to Ala               | Core          | 59              |
| 2092                        | A to C        | Glu to Asp               | Core          | 64              |
| 2121                        | T to C        | Val to Ala               | Core          | 74              |
| 2131                        | A to T        | Glu to Asp               | Core          | 77              |
| 2136                        | C to A        | Pro to Gln               | Core          | 79              |
| 2140                        | G to A        | Syn.                     | Core          | 80              |
| 2149                        | C to T        | Syn.                     | Core          | 83              |
| 2155                        | A to G        | Syn.                     | Core          | 85              |
| 2158                        | C to T        | Syn.                     | Core          | 86              |
| 2174                        | A to C        | Asn to His               | Core          | 92              |
| 2345                        | G to A        | Val to Ile               | Core          | 149             |
| 2429                        | C to A        | Gln to Lys               | Core          | 177             |
| 2440                        | A to C        | Glu to Asp               | Core          | 180             |
| 2898                        | C to T        | Syn.                     | preS1         | 17              |
| 2918                        | G to A        | Arg to Lys               | preS1         | 24              |
| 2929                        | G to A        | Ala to Thr               | preS1         | 28              |
| 3012                        | T to G        | Syn.                     | preS1         | 55              |
| 3090                        | G to A        | Syn.                     | preS1         | 81              |
| 3103                        | A to T        | Thr to Ser               | preS1         | 86              |
| 82                          | A to T        | Syn.                     | preS2         | 31              |
| 96                          | T to C        | Leu to Pro               | preS2         | 36              |
| 190                         | T to G        | Syn.                     | S             | 12              |
| 225                         | G to A        | Arg to Lys               | S             | 24              |
| 286                         | A to G        | Syn.                     | S             | 44              |
| 289                         | T to C        | Syn.                     | S             | 45              |
| 300                         | T to A        | Leu to His               | S             | 49              |
| 346                         | T to C        | Syn.                     | S             | 64              |
| 393                         | T to C        | Phe to Ser               | S             | 80              |
| 400                         | C to A        | Syn.                     | S             | 82              |
| 599                         | A to C        | Syn.                     | S             | 115             |

| <b>Nucleotide Position*</b> | <b>Change</b> | <b>Amino Acid Change</b> | <b>Region</b> | <b>Position</b> |
|-----------------------------|---------------|--------------------------|---------------|-----------------|
| 532                         | T to A        | Syn.                     | S             | 126             |
| 592                         | T to C        | Syn.                     | S             | 146             |
| 777                         | T to C        | Ile to Thr               | S             | 208             |
| 1425                        | T to C        | Syn.                     | X             | 18              |
| 1439                        | C to A        | Syn.                     | X             | 22              |
| 1460                        | C to T        | Syn.                     | X             | 29              |
| 1500                        | T to C        | Ser to Pro               | X             | 43              |
| 1566                        | T to C        | Ser to Pro               | X             | 65              |
| 1635                        | A to T        | Ile to Leu               | X             | 88              |
| 1676                        | A to T        | Syn.                     | X             | 101             |
| 1752                        | A to C        | Ile to Leu               | X             | 127             |
| 1757                        | G to A        | Syn.                     | X             | 128             |
| 2345                        | G to A        | Syn.                     | P             | 13              |
| 2429                        | C to A        | Syn.                     | P             | 41              |
| 2440                        | A to C        | Asn to Thr               | P             | 45              |
| 2479                        | A to G        | Asn to Ser               | P             | 58              |
| 2556                        | T to C        | Syn.                     | P             | 84              |
| 2573                        | C to T        | Syn.                     | P             | 89              |
| 2576                        | A to C        | Lys to Asn               | P             | 90              |
| 2609                        | T to C        | Syn.                     | P             | 101             |
| 2759                        | A to G        | Syn.                     | P             | 151             |
| 2797                        | A to G        | His to Arg               | P             | 164             |
| 2840                        | T to G        | Asp to Glu               | P             | 178             |
| 2898                        | C to T        | Pro to Ser               | P             | 198             |
| 2918                        | G to A        | Syn.                     | P             | 204             |
| 2929                        | G to A        | Arg to His               | P             | 208             |
| 3012                        | T to G        | Phe to Val               | P             | 236             |
| 3090                        | G to A        | Ala to Thr               | P             | 262             |
| 3103                        | A to T        | His to Leu               | P             | 266             |
| 82                          | A to T        | Ser to Cys               | P             | 320             |
| 96                          | T to C        | Syn.                     | P             | 324             |
| 190                         | T to G        | Ser to Ala               | P             | 356             |
| 225                         | G to A        | Syn.                     | P             | 367             |
| 286                         | A to G        | Asn to Asp               | P             | 387             |
| 289                         | T to C        | Tyr to His               | P             | 389             |
| 300                         | T to A        | Syn.                     | P             | 392             |
| 346                         | T to C        | Syn.                     | P             | 408             |
| 393                         | T to C        | Syn.                     | P             | 423             |
| 400                         | C to A        | Leu to Ile               | P             | 426             |
| 499                         | A to C        | Asn to Ile               | P             | 459             |
| 532                         | T to A        | Tyr to Asn               | P             | 470             |

| <b>Nucleotide Position*</b> | <b>Change</b> | <b>Amino Acid Change</b> | <b>Region</b> | <b>Position</b> |
|-----------------------------|---------------|--------------------------|---------------|-----------------|
| 592                         | T to C        | Syn.                     | P             | 490             |
| 777                         | T to C        | Syn.                     | P             | 551             |
| 926                         | T to G        | Ile to Arg               | P             | 601             |
| 948                         | T to C        | Syn.                     | P             | 608             |
| 987                         | A to G        | Syn.                     | P             | 621             |
| 1050                        | G to T        | Syn.                     | P             | 642             |
| 1053                        | G to A        | Syn.                     | P             | 643             |
| 1060                        | T to C        | Syn.                     | P             | 646             |
| 1068                        | A to C        | Syn.                     | P             | 648             |
| 1250                        | C to T        | Ser to Leu               | P             | 709             |
| 1321                        | A to G        | Ile to Val               | P             | 733             |
| 1350                        | A to C        | Syn.                     | P             | 742             |
| 1425                        | T to C        | Syn.                     | P             | 767             |
| 1437                        | G to A        | Syn.                     | P             | 771             |
| 1458                        | C to T        | Syn.                     | P             | 778             |
| 1500                        | T to C        | Syn.                     | P             | 792             |
| 1566                        | T to C        | Syn.                     | P             | 814             |

#### **Submassive hepatic necrosis: Patient 32**

| <b>Nucleotide Position*</b> | <b>Change</b> | <b>Amino Acid Change</b> | <b>Region</b> | <b>Position</b> |
|-----------------------------|---------------|--------------------------|---------------|-----------------|
| 1896                        | G to A        | Trp to stop              | preC          | 28              |
| 1899                        | G to A        | Gly to Asp               | preC          | 29              |
| 1909                        | C to T        | Syn.                     | Core          | 3               |
| 1980                        | T to C        | Val to Ala               | Core          | 27              |
| 2008                        | T to G        | Syn.                     | Core          | 36              |
| 2060                        | G to A        | Ala to Thr               | Core          | 54              |
| 2121                        | T to C        | Val to Ala               | Core          | 74              |
| 2136                        | C to A        | Pro to Gln               | Core          | 79              |
| 2140                        | G to A        | Syn.                     | Core          | 80              |
| 2164                        | T to C        | Syn.                     | Core          | 88              |
| 2167                        | C to T        | Syn.                     | Core          | 89              |
| 2174                        | A to C        | Asn to His               | Core          | 92              |
| 2203                        | G to A        | Syn.                     | Core          | 101             |
| 2213                        | A to G        | Ile to Val               | Core          | 105             |
| 2242                        | A to C        | Syn.                     | Core          | 114             |
| 2253                        | A to T        | Tyr to Phe               | Core          | 118             |
| 2272                        | G to A        | Syn.                     | Core          | 124             |
| 2335                        | G to A        | Syn.                     | Core          | 145             |
| 2339                        | A to T        | Thr to Cys               | Core          | 147             |
| 2340                        | C to G        | Thr to Cys               | Core          | 147             |

| <b>Nucleotide Position*</b> | <b>Change</b> | <b>Amino Acid Change</b> | <b>Region</b> | <b>Position</b> |
|-----------------------------|---------------|--------------------------|---------------|-----------------|
| 2429                        | C to A        | Gln to Lys               | Core          | 177             |
| 3115                        | T to A        | Ser to Thr               | preS1         | 90              |
| 3129                        | T to C        | Syn.                     | preS1         | 94              |
| 80                          | A to G        | Thr to Ala               | preS2         | 31              |
| 96                          | T to C        | Leu to Pro               | preS2         | 36              |
| 176                         | T to C        | Phe to Leu               | S             | 8               |
| 273                         | A to G        | Asn to Ser               | S             | 40              |
| 289                         | T to C        | Syn.                     | S             | 45              |
| 346                         | T to C        | Syn.                     | S             | 64              |
| 381                         | G to A        | Cys to Tyr               | S             | 76              |
| 499                         | A to C        | Syn.                     | S             | 115             |
| 562                         | C to A        | Syn.                     | S             | 136             |
| 770                         | T to A        | Tyr to Asn               | S             | 206             |
| 774                         | G to A        | Ser to Asn               | S             | 207             |
| 1484                        | C to T        | Syn.                     | X             | 37              |
| 1613                        | G to A        | Syn.                     | X             | 80              |
| 1627                        | C to A        | Ala to Asp               | X             | 85              |
| 1633                        | A to G        | Gln to Arg               | X             | 87              |
| 1634                        | A to G        | Gln to Arg               | X             | 87              |
| 1636                        | T to C        | Ile to Thr               | X             | 88              |
| 1676                        | A to T        | Syn.                     | X             | 101             |
| 1753                        | T to C        | Ile to Thr               | X             | 127             |
| 2335                        | G to A        | Arg to Lys               | P             | 10              |
| 2339                        | A to T        | Syn.                     | P             | 11              |
| 2340                        | C to G        | Leu to Val               | P             | 12              |
| 2429                        | C to A        | Syn.                     | P             | 41              |
| 2489                        | G to T        | Syn.                     | P             | 61              |
| 2504                        | T to A        | Syn.                     | P             | 66              |
| 2505                        | G to C        | Val to Leu               | P             | 67              |
| 2603                        | C to T        | Syn.                     | P             | 99              |
| 2645                        | C to T        | Syn.                     | P             | 113             |
| 2772                        | A to G        | Ile to Val               | P             | 156             |
| 2822                        | A to G        | Syn.                     | P             | 172             |
| 3115                        | T to A        | Val to Asp               | P             | 270             |
| 3129                        | T to C        | Tyr to His               | P             | 275             |
| 80                          | A to G        | Asn to Ser               | P             | 319             |
| 96                          | T to C        | Syn.                     | P             | 324             |
| 176                         | T to C        | Ile to Thr               | P             | 351             |
| 273                         | A to G        | Syn.                     | P             | 383             |
| 289                         | T to C        | Tyr to His               | P             | 389             |
| 346                         | T to C        | Syn.                     | P             | 408             |

| <b>Nucleotide Position*</b> | <b>Change</b> | <b>Amino Acid Change</b> | <b>Region</b> | <b>Position</b> |
|-----------------------------|---------------|--------------------------|---------------|-----------------|
| 381                         | G to A        | Syn.                     | P             | 419             |
| 499                         | A to C        | Asn to His               | P             | 419             |
| 562                         | C to A        | Leu to Met               | P             | 480             |
| 770                         | T to A        | Val to Glu               | P             | 549             |
| 774                         | G to A        | Syn.                     | P             | 550             |
| 870                         | A to G        | Syn.                     | P             | 582             |
| 895                         | T to A        | Cys to Ser               | P             | 591             |
| 962                         | T to C        | Ile to Thr               | P             | 613             |
| 1014                        | T to G        | Syn.                     | P             | 630             |
| 1053                        | G to A        | Syn.                     | P             | 643             |
| 1060                        | T to C        | Syn.                     | P             | 646             |
| 1134                        | C to T        | Syn.                     | P             | 670             |
| 1350                        | A to C        | Syn.                     | P             | 742             |
| 1370                        | T to A        | Phe to Tyr               | P             | 749             |
| 1484                        | C to T        | Ser to Phe               | P             | 787             |
| 1613                        | G to A        | Arg to Lys               | P             | 830             |

\*The nucleotide position refers to the wild- type reference HBV strain (*ayw V01460*) (8). Syn. denotes synonymous mutation; preC, pre-core; S, S region; X, X region; P, polymerase region.

**Table S5.** Sequence alignments of HBcAg in patients with acute liver failure and acute hepatitis B, compared to the wild-type reference HBV strain (*ayw V01460*) (8)

HBV-Associated Acute Liver Failure

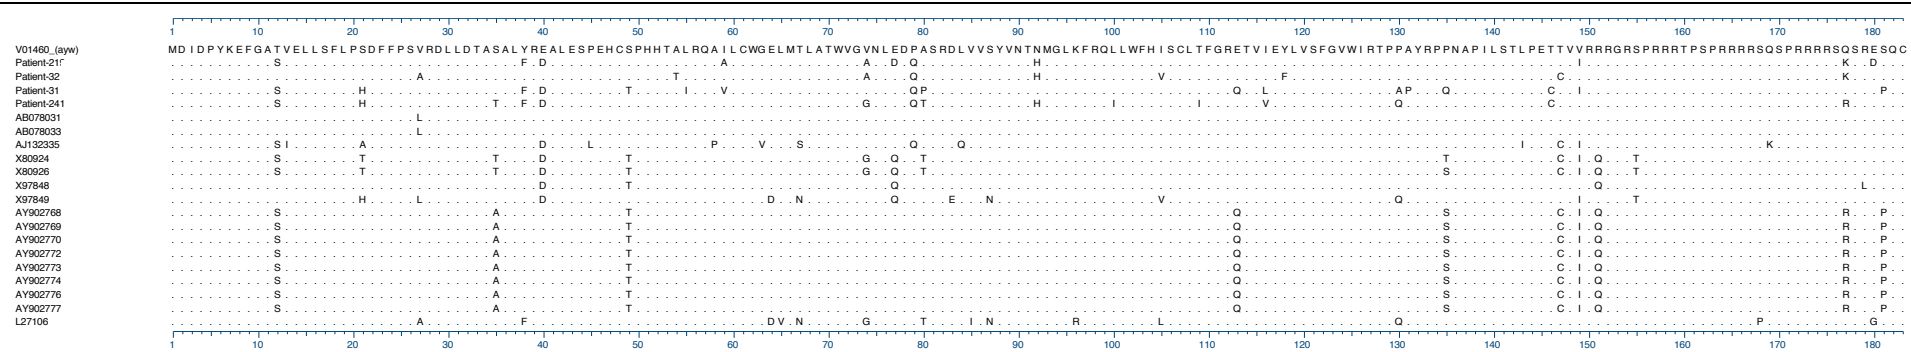

Acute Hepatitis B

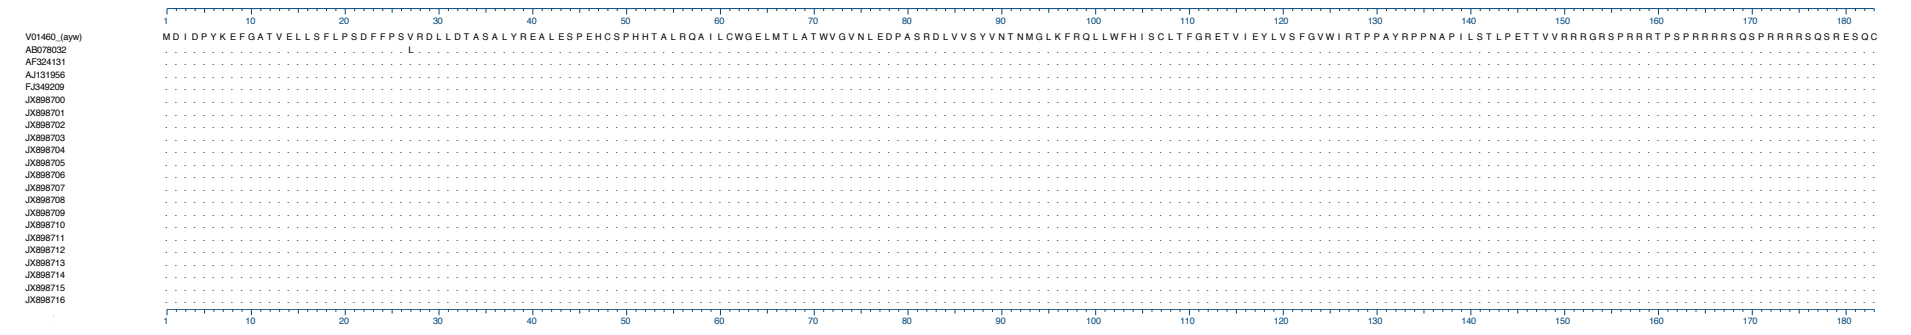

The sequence labels represent GenBank accession numbers.

**Table S6.** Reactivity of various anti-core antibodies against core derived from HBV wild-type (ayw) or from patients 241 and 31 with acute liver failure

| Source                                           | Antibody             | Western Blots |          |         | ELISA    |          |         |
|--------------------------------------------------|----------------------|---------------|----------|---------|----------|----------|---------|
|                                                  |                      | Ayw Core      | 241 Core | 31 Core | Ayw Core | 241 Core | 31 Core |
| Commercially available                           | mAb (aa73-84)        | -             | -        | -       | +++      | -        | -       |
|                                                  | mAb (aa1-10)         | -             | -        | -       | +++      | -        | -       |
|                                                  | Rabbit polyclonal Ab | +++           | -        | -       | +++      | ++       | -       |
| Patient with chronic hepatitis B                 | P98 serum IgG        | +             | +        | -       | ++       | ++       | ++      |
| Patients with HBV-associated acute liver failure | P32 serum IgM        | ++            | ++       | -       | +++      | +++      | ++      |
|                                                  | P241 serum IgM       | -             | +++      | -       | ++       | +++      | ++      |
|                                                  | P219 IgM             | +             | +        | -       | +++      | ++       | +++     |

Reactivity: the sign - denotes no reaction; + denotes positive reaction; ++ denotes strong reaction; +++ denotes very strong reaction.

**Table S7.** List of 1351 differentially expressed genes in HBV-associated acute liver failure with absolute fold change higher than 3, listed in alphabetical order

| <b>mRNA Gene Symbol</b> | <b>Name</b>                                                | <b>Fold Change</b> | <b>Entrez</b> |
|-------------------------|------------------------------------------------------------|--------------------|---------------|
| <i>AIBG</i>             | alpha-1-B glycoprotein                                     | -30.1              | 1             |
| <i>AICF</i>             | APOBEC1 complementation factor                             | -6.8               | 29974         |
| <i>AADAC</i>            | arylacetamide deacetylase (esterase)                       | -6.3               | 13            |
| <i>AADAT</i>            | aminoadipate aminotransferase                              | -3.0               | 51166         |
| <i>AASS</i>             | aminoadipate-semialdehyde synthase                         | -4.2               | 10157         |
| <i>ABAT</i>             | 4-aminobutyrate aminotransferase                           | -10.0              | 18            |
| <i>ABCA5</i>            | ATP-binding cassette, sub-family A (ABC1), member 5        | -3.4               | 23461         |
| <i>ABCA6</i>            | ATP-binding cassette, sub-family A (ABC1), member 6        | -4.6               | 23460         |
| <i>ABCA8</i>            | ATP-binding cassette, sub-family A (ABC1), member 8        | -3.6               | 10351         |
| <i>ABCB4</i>            | ATP-binding cassette, sub-family B (MDR/TAP), member 4     | -10.8              | 5244          |
| <i>ABCC1</i>            | ATP-binding cassette, sub-family C (CFTR/MRP), member 1    | 3.8                | 4363          |
| <i>ABCC2</i>            | ATP-binding cassette, sub-family C (CFTR/MRP), member 2    | -4.3               | 1244          |
| <i>ABCC5</i>            | ATP-binding cassette, sub-family C (CFTR/MRP), member 5    | 3.5                | 10057         |
| <i>ABCC6</i>            | ATP-binding cassette, sub-family C (CFTR/MRP), member 6    | -5.3               | 368           |
| <i>ABCC6P1</i>          | ATP-binding cassette, sub-family C, member 6 pseudogene 1  | -6.5               | 653190        |
| <i>ABCG5</i>            | ATP-binding cassette, sub-family G (WHITE), member 5       | -16.7              | 64240         |
| <i>ABCG8</i>            | ATP-binding cassette, sub-family G (WHITE), member 8       | -3.5               | 64241         |
| <i>ACACB</i>            | acetyl-CoA carboxylase beta                                | -3.8               | 32            |
| <i>ACADL</i>            | acyl-CoA dehydrogenase, long chain                         | -6.7               | 33            |
| <i>ACADSB</i>           | acyl-CoA dehydrogenase, short/branched chain               | -12.2              | 36            |
| <i>ACAP1</i>            | ArfGAP with coiled-coil, ankyrin repeat and PH domains 1   | 3.9                | 9744          |
| <i>ACAT1</i>            | acetyl-CoA acetyltransferase 1                             | -4.0               | 38            |
| <i>ACAT2</i>            | acetyl-CoA acetyltransferase 2                             | -5.6               | 39            |
| <i>ACMSD</i>            | aminocarboxymuconate semialdehyde decarboxylase            | -12.8              | 130013        |
| <i>ACOT12</i>           | acyl-CoA thioesterase 12                                   | -11.2              | 134526        |
| <i>ACOT4</i>            | acyl-CoA thioesterase 4                                    | -3.4               | 122970        |
| <i>ACOX2</i>            | acyl-CoA oxidase 2, branched chain                         | -4.1               | 8309          |
| <i>ACP5</i>             | acid phosphatase 5, tartrate resistant                     | 4.4                | 54            |
| <i>ACSL1</i>            | acyl-CoA synthetase long-chain family member 1             | -4.8               | 2180          |
| <i>ACSM2A</i>           | acyl-CoA synthetase medium-chain family member 2A          | -19.3              | 123876        |
| <i>ACSM3</i>            | acyl-CoA synthetase medium-chain family member 3           | -4.3               | 6296          |
| <i>ACSM5</i>            | acyl-CoA synthetase medium-chain family member 5           | -4.8               | 54988         |
| <i>ACSS3</i>            | acyl-CoA synthetase short-chain family member 3            | -3.9               | 79611         |
| <i>ACTR3C</i>           | ARP3 actin-related protein 3 homolog C (yeast)             | -5.0               | 653857        |
| <i>ADA</i>              | adenosine deaminase                                        | 4.4                | 100           |
| <i>ADAM28</i>           | ADAM metallopeptidase domain 28                            | 3.8                | 10863         |
| <i>ADAMDECI</i>         | ADAM-like, decysin 1                                       | 4.6                | 27299         |
| <i>ADAMTS12</i>         | ADAM metallopeptidase with thrombospondin type 1 motif, 12 | 5.8                | 81792         |
| <i>ADAMTS17</i>         | ADAM metallopeptidase with thrombospondin type 1 motif, 17 | -4.6               | 170691        |
| <i>ADAMTS2</i>          | ADAM metallopeptidase with thrombospondin type 1 motif, 2  | 4.7                | 9509          |
| <i>ADAMTSL3</i>         | ADAMTS-like 3                                              | -4.6               | 57188         |
| <i>ADAP2</i>            | ArfGAP with dual PH domains 2                              | 3.8                | 55803         |
| <i>ADCY1</i>            | adenylate cyclase 1 (brain)                                | -4.7               | 107           |
| <i>ADCY7</i>            | adenylate cyclase 7                                        | 4.2                | 113           |
| <i>ADH1A</i>            | alcohol dehydrogenase 1A (class I), alpha polypeptide      | -23.8              | 124           |
| <i>ADH1B</i>            | alcohol dehydrogenase 1B (class I), beta polypeptide       | -6.0               | 125           |
| <i>ADH1C</i>            | alcohol dehydrogenase 1C (class I), gamma polypeptide      | -15.0              | 126           |
| <i>ADH4</i>             | alcohol dehydrogenase 4 (class II), pi polypeptide         | -9.8               | 127           |
| <i>ADH6</i>             | alcohol dehydrogenase 6 (class V)                          | -8.9               | 130           |



|                   |                                                                                                                                            |       |        |
|-------------------|--------------------------------------------------------------------------------------------------------------------------------------------|-------|--------|
| <b>ADII</b>       | acireductone dioxygenase 1                                                                                                                 | -3.0  | 55256  |
| <b>ADK</b>        | adenosine kinase                                                                                                                           | -3.5  | 132    |
| <b>ADORA3</b>     | adenosine A3 receptor                                                                                                                      | 6.4   | 140    |
| <b>ADRA1A</b>     | adrenergic, alpha-1A-, receptor                                                                                                            | -3.3  | 148    |
| <b>ADRBK2</b>     | adrenergic, beta, receptor kinase 2                                                                                                        | 3.5   | 157    |
| <b>AEBP1</b>      | AE binding protein 1                                                                                                                       | 5.6   | 165    |
| <b>AFM</b>        | afamin                                                                                                                                     | -11.5 | 173    |
| <b>AGBL2</b>      | ATP/GTP binding protein-like 2                                                                                                             | -3.1  | 79841  |
| <b>AGL</b>        | amylo-alpha-1, 6-glucosidase, 4-alpha-glucanotransferase                                                                                   | -3.8  | 178    |
| <b>AGXT</b>       | alanine-glyoxylate aminotransferase                                                                                                        | -14.4 | 189    |
| <b>AGXT2</b>      | alanine--glyoxylate aminotransferase 2                                                                                                     | -15.8 | 64902  |
| <b>AGXT2L1</b>    | alanine-glyoxylate aminotransferase 2-like 1                                                                                               | -16.1 | 64850  |
| <b>AHSG</b>       | alpha-2-HS-glycoprotein                                                                                                                    | -12.7 | 197    |
| <b>AIF1</b>       | allograft inflammatory factor 1                                                                                                            | 4.5   | 199    |
| <b>AIM2</b>       | absent in melanoma 2                                                                                                                       | 4.0   | 9447   |
| <b>AKAP13</b>     | A kinase (PRKA) anchor protein 13                                                                                                          | 3.4   | 11214  |
| <b>AKR1B1</b>     | aldo-keto reductase family 1, member B1 (aldose reductase)                                                                                 | 6.0   | 231    |
| <b>AKR1B10</b>    | aldo-keto reductase family 1, member B10 (aldose reductase)                                                                                | 17.9  | 57016  |
| <b>AKR1C4</b>     | aldo-keto reductase family 1, member C4 (chlordecone reductase; 3-alpha hydroxysteroid dehydrogenase, type I; dihydrodiol dehydrogenase 4) | -7.7  | 1109   |
| <b>AKR1D1</b>     | aldo-keto reductase family 1, member D1 (delta 4-3-ketosteroid-5-beta-reductase)                                                           | -14.7 | 6718   |
| <b>ALAS1</b>      | aminolevulinate, delta-, synthase 1                                                                                                        | -3.2  | 211    |
| <b>ALB</b>        | albumin                                                                                                                                    | -11.9 | 213    |
| <b>ALDH1L1</b>    | aldehyde dehydrogenase 1 family, member L1                                                                                                 | -4.8  | 10840  |
| <b>ALDH1L2</b>    | aldehyde dehydrogenase 1 family, member L2                                                                                                 | 3.7   | 160428 |
| <b>ALDH2</b>      | aldehyde dehydrogenase 2 family (mitochondrial)                                                                                            | -3.8  | 217    |
| <b>ALDH3A1</b>    | aldehyde dehydrogenase 3 family, member A1                                                                                                 | 3.9   | 218    |
| <b>ALDH4A1</b>    | aldehyde dehydrogenase 4 family, member A1                                                                                                 | -3.6  | 8659   |
| <b>ALDH5A1</b>    | aldehyde dehydrogenase 5 family, member A1                                                                                                 | -5.2  | 7915   |
| <b>ALDH6A1</b>    | aldehyde dehydrogenase 6 family, member A1                                                                                                 | -9.4  | 4329   |
| <b>ALDH8A1</b>    | aldehyde dehydrogenase 8 family, member A1                                                                                                 | -14.7 | 64577  |
| <b>ALDOA</b>      | aldolase A, fructose-bisphosphate                                                                                                          | 3.1   | 226    |
| <b>ALDOB</b>      | aldolase B, fructose-bisphosphate                                                                                                          | -6.5  | 229    |
| <b>ALOX5</b>      | arachidonate 5-lipoxygenase                                                                                                                | 4.4   | 240    |
| <b>ALS2</b>       | amyotrophic lateral sclerosis 2 (juvenile)                                                                                                 | -4.3  | 57679  |
| <b>AMBP</b>       | alpha-1-microglobulin/bikunin precursor                                                                                                    | -3.9  | 259    |
| <b>AMDHD1</b>     | amidohydrolase domain containing 1                                                                                                         | -46.7 | 144193 |
| <b>AMICA1</b>     | adhesion molecule, interacts with CXADR antigen 1                                                                                          | 3.7   | 120425 |
| <b>ANG</b>        | angiogenin, ribonuclease, RNase A family, 5                                                                                                | -6.4  | 283    |
| <b>ANGPTL3</b>    | angiopoietin-like 3                                                                                                                        | -12.2 | 27329  |
| <b>ANK3</b>       | ankyrin 3, node of Ranvier (ankyrin G)                                                                                                     | 3.0   | 288    |
| <b>ANKRD36</b>    | ankyrin repeat domain 36                                                                                                                   | 5.0   | 375248 |
| <b>ANKRD36B</b>   | ankyrin repeat domain 36B                                                                                                                  | 4.3   | 57730  |
| <b>ANKRD36BP2</b> | ankyrin repeat domain 36B pseudogene 2                                                                                                     | 12.1  | 645784 |
| <b>ANLN</b>       | anillin, actin binding protein                                                                                                             | 5.4   | 54443  |
| <b>ANO3</b>       | anoctamin 3                                                                                                                                | 3.9   | 63982  |
| <b>ANTXR1</b>     | anthrax toxin receptor 1                                                                                                                   | 4.3   | 84168  |
| <b>ANXA1</b>      | annexin A1                                                                                                                                 | 4.0   | 301    |
| <b>ANXA10</b>     | annexin A10                                                                                                                                | -17.0 | 11199  |
| <b>ANXA13</b>     | annexin A13                                                                                                                                | 5.0   | 312    |
| <b>ANXA2</b>      | annexin A2                                                                                                                                 | 3.9   | 302    |
| <b>ANXA2P2</b>    | annexin A2 pseudogene 2                                                                                                                    | 3.4   | 304    |
| <b>ANXA3</b>      | annexin A3                                                                                                                                 | 5.2   | 306    |
| <b>AOAH</b>       | acyloxyacyl hydrolase (neutrophil)                                                                                                         | 4.2   | 313    |

|                 |                                                                                       |       |        |
|-----------------|---------------------------------------------------------------------------------------|-------|--------|
| <i>AOX1</i>     | aldehyde oxidase 1                                                                    | -25.0 | 316    |
| <i>APOA1</i>    | apolipoprotein A-I                                                                    | -11.3 | 335    |
| <i>APOA2</i>    | apolipoprotein A-II                                                                   | -5.9  | 336    |
| <i>APOA5</i>    | apolipoprotein A-V                                                                    | -5.3  | 116519 |
| <i>APOB</i>     | apolipoprotein B (including Ag(x) antigen)                                            | -5.2  | 338    |
| <i>APOBEC3B</i> | apolipoprotein B mRNA editing enzyme, catalytic polypeptide-like 3B                   | 6.4   | 9582   |
| <i>APOBEC3G</i> | apolipoprotein B mRNA editing enzyme, catalytic polypeptide-like 3G                   | 7.3   | 60489  |
| <i>APOC2</i>    | apolipoprotein C-II                                                                   | -3.5  | 344    |
| <i>APOC3</i>    | apolipoprotein C-III                                                                  | -5.9  | 345    |
| <i>APOC4</i>    | apolipoprotein C-IV                                                                   | -4.9  | 346    |
| <i>APOF</i>     | apolipoprotein F                                                                      | -51.3 | 319    |
| <i>APOH</i>     | apolipoprotein H (beta-2-glycoprotein I)                                              | -8.9  | 350    |
| <i>APOM</i>     | apolipoprotein M                                                                      | -7.8  | 55937  |
| <i>APOOL</i>    | apolipoprotein O-like                                                                 | -3.1  | 139322 |
| <i>AQP1</i>     | aquaporin 1 (Colton blood group)                                                      | 3.5   | 358    |
| <i>AQP11</i>    | aquaporin 11                                                                          | -3.0  | 282679 |
| <i>AQP3</i>     | aquaporin 3 (Gill blood group)                                                        | -3.1  | 360    |
| <i>AQP9</i>     | aquaporin 9                                                                           | -8.2  | 366    |
| <i>AR</i>       | androgen receptor                                                                     | -5.4  | 367    |
| <i>AREG</i>     | amphiregulin                                                                          | 5.4   | 374    |
| <i>ARG1</i>     | arginase, liver                                                                       | -17.9 | 383    |
| <i>ARHGAP15</i> | Rho GTPase activating protein 15                                                      | 3.5   | 55843  |
| <i>ARHGAP25</i> | Rho GTPase activating protein 25                                                      | 3.6   | 9938   |
| <i>ARHGAP30</i> | Rho GTPase activating protein 30                                                      | 4.6   | 257106 |
| <i>ARHGAP9</i>  | Rho GTPase activating protein 9                                                       | 4.5   | 64333  |
| <i>ARHGD1B</i>  | Rho GDP dissociation inhibitor (GDI) beta                                             | 4.5   | 397    |
| <i>ARHGEF26</i> | Rho guanine nucleotide exchange factor (GEF) 26                                       | -4.3  | 26084  |
| <i>ARHGEF3</i>  | Rho guanine nucleotide exchange factor (GEF) 3                                        | 3.5   | 50650  |
| <i>ARHGEF6</i>  | Rac/Cdc42 guanine nucleotide exchange factor (GEF) 6                                  | 3.0   | 9459   |
| <i>ARL4C</i>    | ADP-ribosylation factor-like 4C                                                       | 6.0   | 10123  |
| <i>ARSE</i>     | arylsulfatase E (chondrodysplasia punctata 1)                                         | -3.7  | 415    |
| <i>AS3MT</i>    | arsenic (+3 oxidation state) methyltransferase                                        | -4.6  | 57412  |
| <i>ASGR1</i>    | asialoglycoprotein receptor 1                                                         | -7.8  | 432    |
| <i>ASGR2</i>    | asialoglycoprotein receptor 2                                                         | -5.7  | 433    |
| <i>ASL</i>      | argininosuccinate lyase                                                               | -4.5  | 435    |
| <i>ASPHD2</i>   | aspartate beta-hydroxylase domain containing 2                                        | 5.1   | 57168  |
| <i>ASS1</i>     | argininosuccinate synthase 1                                                          | -5.0  | 445    |
| <i>ATF5</i>     | activating transcription factor 5                                                     | -8.3  | 22809  |
| <i>ATG2B</i>    | ATG2 autophagy related 2 homolog B ( <i>S. cerevisiae</i> )                           | -3.5  | 55102  |
| <i>ATP2B2</i>   | ATPase, Ca <sup>++</sup> transporting, plasma membrane 2                              | -6.4  | 491    |
| <i>ATP7B</i>    | ATPase, Cu <sup>++</sup> transporting, beta polypeptide                               | -5.4  | 540    |
| <i>AVPR1A</i>   | arginine vasopressin receptor 1A                                                      | -4.0  | 552    |
| <i>AZGP1</i>    | alpha-2-glycoprotein 1, zinc-binding                                                  | -23.1 | 563    |
| <i>B7H6</i>     | B7 homolog 6                                                                          | 3.1   | 374383 |
| <i>BAAT</i>     | bile acid CoA: amino acid N-acyltransferase (glycine N-choloyltransferase)            | -4.1  | 570    |
| <i>BACE2</i>    | beta-site APP-cleaving enzyme 2                                                       | 3.8   | 25825  |
| <i>BASP1</i>    | brain abundant, membrane attached signal protein 1                                    | 5.1   | 10409  |
| <i>BBOX1</i>    | butyrobetaine (gamma), 2-oxoglutarate dioxygenase (gamma-butyrobetaine hydroxylase) 1 | -3.7  | 8424   |
| <i>BCAT1</i>    | branched chain amino-acid transaminase 1, cytosolic                                   | 5.5   | 586    |
| <i>BCHE</i>     | butyrylcholinesterase                                                                 | -8.1  | 590    |
| <i>BCKDHB</i>   | branched chain keto acid dehydrogenase E1, beta polypeptide                           | -4.1  | 594    |
| <i>BCL11B</i>   | B-cell CLL/lymphoma 11B (zinc finger protein)                                         | 4.2   | 64919  |

|                  |                                                              |       |        |
|------------------|--------------------------------------------------------------|-------|--------|
| <b>BCL2</b>      | B-cell CLL/lymphoma 2                                        | 3.4   | 596    |
| <b>BCO2</b>      | beta-carotene oxygenase 2                                    | -4.9  | 83875  |
| <b>BDH1</b>      | 3-hydroxybutyrate dehydrogenase, type 1                      | -5.4  | 622    |
| <b>BEX4</b>      | brain expressed, X-linked 4                                  | 4.1   | 56271  |
| <b>BGN</b>       | biglycan                                                     | 4.3   | 633    |
| <b>BHLHE41</b>   | basic helix-loop-helix family, member e41                    | 4.9   | 79365  |
| <b>BHMT</b>      | betaine--homocysteine S-methyltransferase                    | -4.5  | 635    |
| <b>BHMT2</b>     | betaine--homocysteine S-methyltransferase 2                  | -10.5 | 23743  |
| <b>BICCI1</b>    | bicaudal C homolog 1 (Drosophila)                            | 4.1   | 80114  |
| <b>BLNK</b>      | B-cell linker                                                | -3.0  | 29760  |
| <b>BNIP3</b>     | BCL2/adenovirus E1B 19kDa interacting protein 3              | -3.3  | 664    |
| <b>BRP44</b>     | brain protein 44                                             | -3.6  | 25874  |
| <b>BUB1</b>      | budding uninhibited by benzimidazoles 1 homolog (yeast)      | 4.0   | 699    |
| <b>BUB1B</b>     | budding uninhibited by benzimidazoles 1 homolog beta (yeast) | 5.2   | 701    |
| <b>C10orf128</b> | chromosome 10 open reading frame 128                         | 3.0   | 170371 |
| <b>C10orf54</b>  | chromosome 10 open reading frame 54                          | 3.6   | 64115  |
| <b>C10orf57</b>  | chromosome 10 open reading frame 57                          | -3.5  | 80195  |
| <b>C11orf80</b>  | chromosome 11 open reading frame 80                          | 3.1   | 79703  |
| <b>C12orf75</b>  | chromosome 12 open reading frame 75                          | 7.2   | 387882 |
| <b>C14orf28</b>  | chromosome 14 open reading frame 28                          | -4.2  | 122525 |
| <b>C15orf52</b>  | chromosome 15 open reading frame 52                          | 3.2   | 388115 |
| <b>C16orf54</b>  | chromosome 16 open reading frame 54                          | 6.6   | 283897 |
| <b>C18orf18</b>  | chromosome 18 open reading frame 18                          | -3.3  | 147525 |
| <b>C1orf106</b>  | chromosome 1 open reading frame 106                          | 4.7   | 55765  |
| <b>C1orf115</b>  | chromosome 1 open reading frame 115                          | -5.0  | 79762  |
| <b>C1orf116</b>  | chromosome 1 open reading frame 116                          | 3.6   | 79098  |
| <b>C1orf162</b>  | chromosome 1 open reading frame 162                          | 8.2   | 128346 |
| <b>C1orf168</b>  | chromosome 1 open reading frame 168                          | -4.5  | 199920 |
| <b>C1orf226</b>  | chromosome 1 open reading frame 226                          | -3.5  | 400793 |
| <b>C1orf38</b>   | chromosome 1 open reading frame 38                           | 5.9   | 9473   |
| <b>C1orf53</b>   | chromosome 1 open reading frame 53                           | -3.2  | 388722 |
| <b>C1orf54</b>   | chromosome 1 open reading frame 54                           | 5.0   | 79630  |
| <b>C1QA</b>      | complement component 1, q subcomponent, A chain              | 10.1  | 712    |
| <b>C1QB</b>      | complement component 1, q subcomponent, B chain              | 12.9  | 713    |
| <b>C1QC</b>      | complement component 1, q subcomponent, C chain              | 6.5   | 714    |
| <b>C1R</b>       | complement component 1, r subcomponent                       | -3.2  | 715    |
| <b>C1RL</b>      | complement component 1, r subcomponent-like                  | -4.4  | 51279  |
| <b>C1S</b>       | complement component 1, s subcomponent                       | -6.1  | 716    |
| <b>C2</b>        | complement component 2                                       | -4.0  | 717    |
| <b>C20orf3</b>   | chromosome 20 open reading frame 3                           | -3.5  | 57136  |
| <b>C2orf72</b>   | chromosome 2 open reading frame 72                           | -3.1  | 257407 |
| <b>C3AR1</b>     | complement component 3a receptor 1                           | 3.1   | 719    |
| <b>C3orf23</b>   | chromosome 3 open reading frame 23                           | -3.1  | 285343 |
| <b>C3orf52</b>   | chromosome 3 open reading frame 52                           | 3.0   | 79669  |
| <b>C3P1</b>      | complement component 3 precursor pseudogene                  | -18.7 | 388503 |
| <b>C4BPA</b>     | complement component 4 binding protein, alpha                | -18.4 | 722    |
| <b>C4BPB</b>     | complement component 4 binding protein, beta                 | -20.5 | 725    |
| <b>C4orf19</b>   | chromosome 4 open reading frame 19                           | -3.9  | 55286  |
| <b>C4orf34</b>   | chromosome 4 open reading frame 34                           | -4.3  | 201895 |
| <b>C4orf48</b>   | chromosome 4 open reading frame 48                           | 5.6   | 401115 |
| <b>C5</b>        | complement component 5                                       | -15.3 | 727    |
| <b>C5AR1</b>     | complement component 5a receptor 1                           | 3.4   | 728    |
| <b>C5orf27</b>   | chromosome 5 open reading frame 27                           | -6.1  | 202299 |
| <b>C6</b>        | complement component 6                                       | -10.4 | 729    |
| <b>C6orf145</b>  | chromosome 6 open reading frame 145                          | -3.3  | 221749 |
| <b>C8A</b>       | complement component 8, alpha polypeptide                    | -39.1 | 731    |

|                 |                                                                           |        |        |
|-----------------|---------------------------------------------------------------------------|--------|--------|
| <b>C8B</b>      | complement component 8, beta polypeptide                                  | -35.7  | 732    |
| <b>C8G</b>      | complement component 8, gamma polypeptide                                 | -6.2   | 733    |
| <b>C8orf38</b>  | chromosome 8 open reading frame 38                                        | -3.1   | 137682 |
| <b>C8orf46</b>  | chromosome 8 open reading frame 46                                        | -6.5   | 254778 |
| <b>C9</b>       | complement component 9                                                    | -117.7 | 735    |
| <b>C9orf16</b>  | chromosome 9 open reading frame 16                                        | 3.5    | 79095  |
| <b>CA12</b>     | carbonic anhydrase XII                                                    | 3.3    | 771    |
| <b>CA2</b>      | carbonic anhydrase II                                                     | -7.4   | 760    |
| <b>CA5A</b>     | carbonic anhydrase VA, mitochondrial                                      | -4.2   | 763    |
| <b>CAPG</b>     | capping protein (actin filament), gelsolin-like                           | 5.4    | 822    |
| <b>CAPN5</b>    | calpain 5                                                                 | -3.0   | 726    |
| <b>CAPN6</b>    | calpain 6                                                                 | 3.7    | 827    |
| <b>CARD16</b>   | caspase recruitment domain family, member 16                              | 4.8    | 114769 |
| <b>CBLB</b>     | Cas-Br-M (murine) ecotropic retroviral transforming sequence b            | 3.1    | 868    |
| <b>CBS</b>      | cystathionine-beta-synthase                                               | -5.2   | 875    |
| <b>CCDC102B</b> | coiled-coil domain containing 102B                                        | 6.5    | 79839  |
| <b>CCDC109B</b> | coiled-coil domain containing 109B                                        | 3.8    | 55013  |
| <b>CCDC146</b>  | coiled-coil domain containing 146                                         | 4.8    | 57639  |
| <b>CCDC80</b>   | coiled-coil domain containing 80                                          | 4.2    | 151887 |
| <b>CCDC88A</b>  | coiled-coil domain containing 88A                                         | 3.6    | 55704  |
| <b>CCL16</b>    | chemokine (C-C motif) ligand 16                                           | -5.7   | 6360   |
| <b>CCL18</b>    | chemokine (C-C motif) ligand 18 (pulmonary and activation-regulated)      | 8.0    | 6362   |
| <b>CCL5</b>     | chemokine (C-C motif) ligand 5                                            | 9.2    | 6352   |
| <b>CCNB1</b>    | cyclin B1                                                                 | 5.1    | 891    |
| <b>CCNB2</b>    | cyclin B2                                                                 | 3.7    | 9133   |
| <b>CCND2</b>    | cyclin D2                                                                 | 4.0    | 894    |
| <b>CCR1</b>     | chemokine (C-C motif) receptor 1                                          | 3.4    | 1230   |
| <b>CCR2</b>     | chemokine (C-C motif) receptor 2                                          | 8.0    | 729230 |
| <b>CCR5</b>     | chemokine (C-C motif) receptor 5                                          | 4.7    | 1234   |
| <b>CCR7</b>     | chemokine (C-C motif) receptor 7                                          | 3.5    | 1236   |
| <b>CCRL2</b>    | chemokine (C-C motif) receptor-like 2                                     | 3.6    | 9034   |
| <b>CD163</b>    | CD163 molecule                                                            | 5.0    | 9332   |
| <b>CD163</b>    | CD163 molecule                                                            | 4.6    | 9332   |
| <b>CD2</b>      | CD2 molecule                                                              | 8.5    | 914    |
| <b>CD209</b>    | CD209 molecule                                                            | 3.2    | 30835  |
| <b>CD24</b>     | CD24 molecule                                                             | 4.2    | 1E+08  |
| <b>CD27</b>     | CD27 molecule                                                             | 4.9    | 939    |
| <b>CD300A</b>   | CD300a molecule                                                           | 4.1    | 11314  |
| <b>CD300LF</b>  | CD300 molecule-like family member f                                       | 4.5    | 146722 |
| <b>CD302</b>    | CD302 molecule                                                            | -5.3   | 9936   |
| <b>CD38</b>     | CD38 molecule                                                             | 3.1    | 952    |
| <b>CD3D</b>     | CD3d molecule, delta (CD3-TCR complex)                                    | 5.3    | 915    |
| <b>CD3G</b>     | CD3g molecule, gamma (CD3-TCR complex)                                    | 4.6    | 917    |
| <b>CD44</b>     | CD44 molecule (Indian blood group)                                        | 3.2    | 960    |
| <b>CD52</b>     | CD52 molecule                                                             | 11.7   | 1043   |
| <b>CD53</b>     | CD53 molecule                                                             | 4.5    | 963    |
| <b>CD72</b>     | CD72 molecule                                                             | 4.9    | 971    |
| <b>CD74</b>     | CD74 molecule, major histocompatibility complex, class II invariant chain | 6.5    | 972    |
| <b>CD84</b>     | CD84 molecule                                                             | 4.8    | 8832   |
| <b>CD86</b>     | CD86 molecule                                                             | 5.2    | 942    |
| <b>CD8A</b>     | CD8a molecule                                                             | 6.6    | 925    |
| <b>CD8B</b>     | CD8b molecule                                                             | 4.0    | 926    |
| <b>CD93</b>     | CD93 molecule                                                             | 3.7    | 22918  |
| <b>CD97</b>     | CD97 molecule                                                             | 4.1    | 976    |

|                 |                                                                                                   |       |        |
|-----------------|---------------------------------------------------------------------------------------------------|-------|--------|
| <b>CDC14B</b>   | CDC14 cell division cycle 14 homolog B ( <i>S. cerevisiae</i> )                                   | -3.4  | 8555   |
| <b>CDC20</b>    | cell division cycle 20 homolog ( <i>S. cerevisiae</i> )                                           | 5.8   | 991    |
| <b>CDC37L1</b>  | cell division cycle 37 homolog ( <i>S. cerevisiae</i> )-like 1                                    | -3.1  | 55664  |
| <b>CDC42EP5</b> | CDC42 effector protein (Rho GTPase binding) 5                                                     | 4.1   | 148170 |
| <b>CDCP1</b>    | CUB domain containing protein 1                                                                   | 3.3   | 64866  |
| <b>CDH11</b>    | cadherin 11, type 2, OB-cadherin (osteoblast)                                                     | 3.1   | 1009   |
| <b>CDH6</b>     | cadherin 6, type 2, K-cadherin (fetal kidney)                                                     | 3.2   | 1004   |
| <b>CDO1</b>     | cysteine dioxygenase, type I                                                                      | -31.4 | 1036   |
| <b>CEBPA</b>    | CCAAT/enhancer binding protein (C/EBP), alpha                                                     | -3.1  | 1050   |
| <b>CEBPD</b>    | CCAAT/enhancer binding protein (C/EBP), delta                                                     | -3.4  | 1052   |
| <b>CECR1</b>    | cat eye syndrome chromosome region, candidate 1                                                   | 8.4   | 51816  |
| <b>CELF2</b>    | CUGBP, Elav-like family member 2                                                                  | 4.1   | 10659  |
| <b>CENPF</b>    | centromere protein F, 350/400kDa (mitosin)                                                        | 3.3   | 1063   |
| <b>CENPV</b>    | centromere protein V                                                                              | -3.3  | 201161 |
| <b>CEP128</b>   | centrosomal protein 128kDa                                                                        | 4.2   | 145508 |
| <b>CEP55</b>    | centrosomal protein 55kDa                                                                         | 3.4   | 55165  |
| <b>CERS2</b>    | ceramide synthase 2                                                                               | -4.0  | 29956  |
| <b>CES1</b>     | carboxylesterase 1                                                                                | -9.1  | 1066   |
| <b>CES2</b>     | carboxylesterase 2                                                                                | -3.3  | 8824   |
| <b>CFB</b>      | complement factor B                                                                               | -5.9  | 629    |
| <b>CFD</b>      | complement factor D (adipsin)                                                                     | 8.9   | 1675   |
| <b>CFH</b>      | complement factor H                                                                               | -5.3  | 3075   |
| <b>CFHR2</b>    | complement factor H-related 2                                                                     | -13.3 | 3080   |
| <b>CFHR3</b>    | complement factor H-related 3                                                                     | -54.0 | 10878  |
| <b>CFHR4</b>    | complement factor H-related 4                                                                     | -73.1 | 10877  |
| <b>CFHR5</b>    | complement factor H-related 5                                                                     | -50.8 | 81494  |
| <b>CFI</b>      | complement factor I                                                                               | -7.3  | 3426   |
| <b>CFL2</b>     | cofilin 2 (muscle)                                                                                | -4.1  | 1073   |
| <b>CFP</b>      | complement factor properdin                                                                       | 8.0   | 5199   |
| <b>CFTR</b>     | cystic fibrosis transmembrane conductance regulator (ATP-binding cassette sub-family C, member 7) | 3.3   | 1080   |
| <b>CGNL1</b>    | cingulin-like 1                                                                                   | -4.0  | 84952  |
| <b>CHN2</b>     | chimerin (chimaerin) 2                                                                            | -3.6  | 1124   |
| <b>CHPT1</b>    | choline phosphotransferase 1                                                                      | -3.3  | 56994  |
| <b>CHST11</b>   | carbohydrate (chondroitin 4) sulfotransferase 11                                                  | 3.9   | 50515  |
| <b>CHST2</b>    | carbohydrate (N-acetylglucosamine-6-O) sulfotransferase 2                                         | 3.4   | 9435   |
| <b>CHST4</b>    | carbohydrate (N-acetylglucosamine 6-O) sulfotransferase 4                                         | 3.5   | 10164  |
| <b>CIDEB</b>    | cell death-inducing DFFA-like effector b                                                          | -3.0  | 27141  |
| <b>CIITA</b>    | class II, major histocompatibility complex, transactivator                                        | 3.4   | 4261   |
| <b>CKAP2</b>    | cytoskeleton associated protein 2                                                                 | 9.8   | 26586  |
| <b>CLDN10</b>   | claudin 10                                                                                        | 3.8   | 9071   |
| <b>CLDN11</b>   | claudin 11                                                                                        | 6.3   | 5010   |
| <b>CLDN12</b>   | claudin 12                                                                                        | -3.2  | 9069   |
| <b>CLEC11A</b>  | C-type lectin domain family 11, member A                                                          | 3.6   | 6320   |
| <b>CLEC12A</b>  | C-type lectin domain family 12, member A                                                          | 3.6   | 160364 |
| <b>CLEC7A</b>   | C-type lectin domain family 7, member A                                                           | 3.3   | 64581  |
| <b>CLIC2</b>    | chloride intracellular channel 2                                                                  | 3.3   | 1193   |
| <b>CLIC6</b>    | chloride intracellular channel 6                                                                  | 6.3   | 54102  |
| <b>CLIP4</b>    | CAP-GLY domain containing linker protein family, member 4                                         | 3.0   | 79745  |
| <b>CLRN3</b>    | clarin 3                                                                                          | -8.1  | 119467 |
| <b>CLU</b>      | clusterin                                                                                         | -5.9  | 1191   |
| <b>CMKLR1</b>   | chemokine-like receptor 1                                                                         | 5.5   | 1240   |
| <b>CMTM7</b>    | CKLF-like MARVEL transmembrane domain containing 7                                                | 5.2   | 112616 |
| <b>CMTM8</b>    | CKLF-like MARVEL transmembrane domain containing 8                                                | -4.1  | 152189 |
| <b>CNDP1</b>    | carnosine dipeptidase 1 (metallopeptidase M20 family)                                             | -13.8 | 84735  |
| <b>CNGA1</b>    | cyclic nucleotide gated channel alpha 1                                                           | -3.1  | 1259   |

|                |                                                                      |       |        |
|----------------|----------------------------------------------------------------------|-------|--------|
| <i>CNTLN</i>   | centlein, centrosomal protein                                        | -3.8  | 54875  |
| <i>CNTN3</i>   | contactin 3 (plasmacytoma associated)                                | -3.2  | 5067   |
| <i>COBLL1</i>  | COBL-like 1                                                          | -3.8  | 22837  |
| <i>COL16A1</i> | collagen, type XVI, alpha 1                                          | 3.4   | 1307   |
| <i>COL1A1</i>  | collagen, type I, alpha 1                                            | 9.0   | 1277   |
| <i>COL1A2</i>  | collagen, type I, alpha 2                                            | 8.3   | 1278   |
| <i>COL3A1</i>  | collagen, type III, alpha 1                                          | 5.2   | 1281   |
| <i>COL4A1</i>  | collagen, type IV, alpha 1                                           | 5.6   | 1282   |
| <i>COL4A2</i>  | collagen, type IV, alpha 2                                           | 6.8   | 1284   |
| <i>COL4A4</i>  | collagen, type IV, alpha 4                                           | 3.8   | 1286   |
| <i>COL5A1</i>  | collagen, type V, alpha 1                                            | 6.3   | 1289   |
| <i>COL5A2</i>  | collagen, type V, alpha 2                                            | 3.5   | 1290   |
| <i>COL6A1</i>  | collagen, type VI, alpha 1                                           | 3.1   | 1291   |
| <i>COL6A2</i>  | collagen, type VI, alpha 2                                           | 3.8   | 1292   |
| <i>COL6A3</i>  | collagen, type VI, alpha 3                                           | 4.6   | 1293   |
| <i>CORO1A</i>  | coronin, actin binding protein, 1A                                   | 5.7   | 11151  |
| <i>COTL1</i>   | coactosin-like 1 (Dictyostelium)                                     | 5.1   | 23406  |
| <i>CP</i>      | ceruloplasmin (ferroxidase)                                          | -17.8 | 1356   |
| <i>CPEB3</i>   | cytoplasmic polyadenylation element binding protein 3                | -3.9  | 22849  |
| <i>CPNI</i>    | carboxypeptidase N, polypeptide 1                                    | -26.2 | 1369   |
| <i>CPN2</i>    | carboxypeptidase N, polypeptide 2                                    | -7.3  | 1370   |
| <i>CPS1</i>    | carbamoyl-phosphate synthase 1, mitochondrial                        | -8.9  | 1373   |
| <i>CPVL</i>    | carboxypeptidase, vitellogenic-like                                  | 5.9   | 54504  |
| <i>CR1</i>     | complement component (3b/4b) receptor 1 (Knops blood group)          | 4.5   | 1378   |
| <i>CREB5</i>   | cAMP responsive element binding protein 5                            | 4.0   | 9586   |
| <i>CRIM1</i>   | cysteine rich transmembrane BMP regulator 1 (chordin-like)           | 3.1   | 51232  |
| <i>CRIP1</i>   | cysteine-rich protein 1 (intestinal)                                 | 4.4   | 1396   |
| <i>CROT</i>    | carnitine O-octanoyltransferase                                      | -3.1  | 54677  |
| <i>CRYAB</i>   | crystallin, alpha B                                                  | 3.7   | 1410   |
| <i>CRYZ</i>    | crystallin, zeta (quinone reductase)                                 | -3.2  | 1429   |
| <i>CSAD</i>    | cysteine sulfinic acid decarboxylase                                 | -3.0  | 51380  |
| <i>CSF1R</i>   | colony stimulating factor 1 receptor                                 | 5.4   | 1436   |
| <i>CST7</i>    | cystatin F (leukocystatin)                                           | 4.1   | 8530   |
| <i>CTBS</i>    | chitobiase, di-N-acetyl-                                             | -3.3  | 1486   |
| <i>CTH</i>     | cystathionase (cystathionine gamma-lyase)                            | -8.7  | 1491   |
| <i>CTHRC1</i>  | collagen triple helix repeat containing 1                            | 14.1  | 115908 |
| <i>CTLA4</i>   | cytotoxic T-lymphocyte-associated protein 4                          | 4.6   | 1493   |
| <i>CTSC</i>    | cathepsin C                                                          | 4.9   | 1075   |
| <i>CTSE</i>    | cathepsin E                                                          | 6.2   | 1510   |
| <i>CTSS</i>    | cathepsin S                                                          | 4.0   | 1520   |
| <i>CUX2</i>    | cut-like homeobox 2                                                  | -6.8  | 23316  |
| <i>CXCL14</i>  | chemokine (C-X-C motif) ligand 14                                    | 5.2   | 9547   |
| <i>CXCL2</i>   | chemokine (C-X-C motif) ligand 2                                     | -4.2  | 2920   |
| <i>CXCL5</i>   | chemokine (C-X-C motif) ligand 5                                     | 8.9   | 6374   |
| <i>CXCL6</i>   | chemokine (C-X-C motif) ligand 6 (granulocyte chemotactic protein 2) | 6.7   | 6372   |
| <i>CXCR4</i>   | chemokine (C-X-C motif) receptor 4                                   | 5.3   | 7852   |
| <i>CXCR6</i>   | chemokine (C-X-C motif) receptor 6                                   | 5.3   | 10663  |
| <i>CYB5A</i>   | cytochrome b5 type A (microsomal)                                    | -4.4  | 1528   |
| <i>CYBA</i>    | cytochrome b-245, alpha polypeptide                                  | 7.9   | 1535   |
| <i>CYBB</i>    | cytochrome b-245, beta polypeptide                                   | 3.0   | 1536   |
| <i>CYP1A1</i>  | cytochrome P450, family 1, subfamily A, polypeptide 1                | -7.2  | 1543   |
| <i>CYP1A2</i>  | cytochrome P450, family 1, subfamily A, polypeptide 2                | -13.7 | 1544   |
| <i>CYP26A1</i> | cytochrome P450, family 26, subfamily A, polypeptide 1               | -5.3  | 1592   |
| <i>CYP26B1</i> | cytochrome P450, family 26, subfamily B, polypeptide 1               | 3.6   | 56603  |
| <i>CYP27A1</i> | cytochrome P450, family 27, subfamily A, polypeptide 1               | -3.8  | 1593   |

|                |                                                            |       |        |
|----------------|------------------------------------------------------------|-------|--------|
| <b>CYP2B6</b>  | cytochrome P450, family 2, subfamily B, polypeptide 6      | -10.5 | 1555   |
| <b>CYP2C18</b> | cytochrome P450, family 2, subfamily C, polypeptide 18     | -7.2  | 1562   |
| <b>CYP2C19</b> | cytochrome P450, family 2, subfamily C, polypeptide 19     | -6.9  | 1557   |
| <b>CYP2C8</b>  | cytochrome P450, family 2, subfamily C, polypeptide 8      | -12.4 | 1558   |
| <b>CYP2C9</b>  | cytochrome P450, family 2, subfamily C, polypeptide 9      | -8.4  | 1559   |
| <b>CYP2D6</b>  | cytochrome P450, family 2, subfamily D, polypeptide 6      | -8.2  | 1565   |
| <b>CYP2E1</b>  | cytochrome P450, family 2, subfamily E, polypeptide 1      | -13.6 | 1571   |
| <b>CYP2J2</b>  | cytochrome P450, family 2, subfamily J, polypeptide 2      | -6.2  | 1573   |
| <b>CYP39A1</b> | cytochrome P450, family 39, subfamily A, polypeptide 1     | -6.8  | 51302  |
| <b>CYP3A4</b>  | cytochrome P450, family 3, subfamily A, polypeptide 4      | -6.9  | 1576   |
| <b>CYP3A43</b> | cytochrome P450, family 3, subfamily A, polypeptide 43     | -3.9  | 64816  |
| <b>CYP3A5</b>  | cytochrome P450, family 3, subfamily A, polypeptide 5      | -5.4  | 1577   |
| <b>CYP3A7</b>  | cytochrome P450, family 3, subfamily A, polypeptide 7      | -5.7  | 1551   |
| <b>CYP4A11</b> | cytochrome P450, family 4, subfamily A, polypeptide 11     | -7.5  | 1579   |
| <b>CYP4F2</b>  | cytochrome P450, family 4, subfamily F, polypeptide 2      | -17.8 | 8529   |
| <b>CYP4F3</b>  | cytochrome P450, family 4, subfamily F, polypeptide 3      | -27.9 | 4051   |
| <b>CYP4V2</b>  | cytochrome P450, family 4, subfamily V, polypeptide 2      | -3.2  | 285440 |
| <b>CYP51A1</b> | cytochrome P450, family 51, subfamily A, polypeptide 1     | -3.4  | 1595   |
| <b>CYP8B1</b>  | cytochrome P450, family 8, subfamily B, polypeptide 1      | -19.0 | 1582   |
| <b>CYSLTR1</b> | cysteinyl leukotriene receptor 1                           | 3.7   | 10800  |
| <b>CYTIP</b>   | cytohesin 1 interacting protein                            | 7.3   | 9595   |
| <b>DBN1</b>    | drebrin 1                                                  | 3.7   | 1627   |
| <b>DCDC2</b>   | doublecortin domain containing 2                           | 3.9   | 51473  |
| <b>DCXR</b>    | dicarbonyl/L-xylulose reductase                            | -3.6  | 51181  |
| <b>DDC</b>     | dopa decarboxylase (aromatic L-amino acid decarboxylase)   | -4.4  | 1644   |
| <b>DECR2</b>   | 2,4-dienoyl CoA reductase 2, peroxisomal                   | -3.6  | 26063  |
| <b>DEF6</b>    | differentially expressed in FDCP 6 homolog (mouse)         | 3.9   | 50619  |
| <b>DEPDC7</b>  | DEP domain containing 7                                    | -11.4 | 91614  |
| <b>DERL3</b>   | Der1-like domain family, member 3                          | 3.0   | 91319  |
| <b>DGAT2</b>   | diacylglycerol O-acyltransferase 2                         | -4.5  | 84649  |
| <b>DHCR24</b>  | 24-dehydrocholesterol reductase                            | -4.6  | 1718   |
| <b>DHCR7</b>   | 7-dehydrocholesterol reductase                             | -3.8  | 1717   |
| <b>DHODH</b>   | dihydroorotate dehydrogenase (quinone)                     | -10.3 | 1723   |
| <b>DIO1</b>    | deiodinase, iodothyronine, type 1                          | -18.0 | 1733   |
| <b>DLGAP5</b>  | discs, large (Drosophila) homolog-associated protein 5     | 5.9   | 9787   |
| <b>DMGDH</b>   | dimethylglycine dehydrogenase                              | -16.7 | 29958  |
| <b>DNAJB9</b>  | DnaJ (Hsp40) homolog, subfamily B, member 9                | -3.9  | 4189   |
| <b>DNAJC12</b> | DnaJ (Hsp40) homolog, subfamily C, member 12               | -5.8  | 56521  |
| <b>DOCK10</b>  | dedicator of cytokinesis 10                                | 3.5   | 55619  |
| <b>DOCK11</b>  | dedicator of cytokinesis 11                                | 3.8   | 139818 |
| <b>DOCK2</b>   | dedicator of cytokinesis 2                                 | 5.9   | 1794   |
| <b>DOCK8</b>   | dedicator of cytokinesis 8                                 | 4.0   | 81704  |
| <b>DOK3</b>    | docking protein 3                                          | 5.7   | 79930  |
| <b>DPEP2</b>   | dipeptidase 2                                              | 7.9   | 64174  |
| <b>DPYS</b>    | dihydropyrimidinase                                        | -12.3 | 1807   |
| <b>DSC2</b>    | desmocollin 2                                              | 3.3   | 1824   |
| <b>DTNA</b>    | dystrobrevin, alpha                                        | 3.6   | 1837   |
| <b>DUSP10</b>  | dual specificity phosphatase 10                            | -3.4  | 11221  |
| <b>DUSP4</b>   | dual specificity phosphatase 4                             | 3.5   | 1846   |
| <b>EBP</b>     | emopamil binding protein (sterol isomerase)                | -4.3  | 10682  |
| <b>ECHDC2</b>  | enoyl CoA hydratase domain containing 2                    | -3.2  | 55268  |
| <b>ECI2</b>    | enoyl-CoA delta isomerase 2                                | -3.0  | 10455  |
| <b>EDN1</b>    | endothelin 1                                               | 3.1   | 1906   |
| <b>EFEMP1</b>  | EGF containing fibulin-like extracellular matrix protein 1 | 4.1   | 2202   |
| <b>EFEMP2</b>  | EGF containing fibulin-like extracellular matrix protein 2 | 3.2   | 30008  |
| <b>EFNA1</b>   | ephrin-A1                                                  | -4.9  | 1942   |

|                 |                                                                                   |       |        |
|-----------------|-----------------------------------------------------------------------------------|-------|--------|
| <b>EHF</b>      | ets homologous factor                                                             | 4.0   | 26298  |
| <b>EHHADH</b>   | enoyl-CoA, hydratase/3-hydroxyacyl CoA dehydrogenase                              | -6.5  | 1962   |
| <b>ELF4</b>     | E74-like factor 4 (ets domain transcription factor)                               | 4.5   | 2000   |
| <b>ELOVL2</b>   | ELOVL fatty acid elongase 2                                                       | -5.9  | 54898  |
| <b>ELOVL6</b>   | ELOVL fatty acid elongase 6                                                       | -4.1  | 79071  |
| <b>ELOVL7</b>   | ELOVL fatty acid elongase 7                                                       | 5.9   | 79993  |
| <b>EMILIN1</b>  | elastin microfibril interfacier 1                                                 | 3.2   | 11117  |
| <b>EMILIN2</b>  | elastin microfibril interfacier 2                                                 | 4.6   | 84034  |
| <b>EMP3</b>     | epithelial membrane protein 3                                                     | 5.0   | 2014   |
| <b>ENPEP</b>    | glutamyl aminopeptidase (aminopeptidase A)                                        | -3.9  | 2028   |
| <b>ENPPI</b>    | ectonucleotide pyrophosphatase/phosphodiesterase 1                                | -6.2  | 5167   |
| <b>ENTPD1</b>   | ectonucleoside triphosphate diphosphohydrolase 1                                  | 3.1   | 953    |
| <b>EOMES</b>    | eomesodermin                                                                      | 3.1   | 8320   |
| <b>EPB41L3</b>  | erythrocyte membrane protein band 4.1-like 3                                      | 3.8   | 23136  |
| <b>EPB41L4B</b> | erythrocyte membrane protein band 4.1 like 4B                                     | -3.9  | 54566  |
| <b>EPB41L5</b>  | erythrocyte membrane protein band 4.1 like 5                                      | -5.9  | 57669  |
| <b>EPCAM</b>    | epithelial cell adhesion molecule                                                 | 10.3  | 4072   |
| <b>EPHX2</b>    | epoxide hydrolase 2, cytoplasmic                                                  | -6.2  | 2053   |
| <b>EPT1</b>     | ethanolaminephosphotransferase 1 (CDP-ethanolamine-specific)                      | -4.1  | 85465  |
| <b>ERBB3</b>    | v-erb-b2 erythroblastic leukemia viral oncogene homolog 3 (avian)                 | -3.1  | 2065   |
| <b>ERLIN1</b>   | ER lipid raft associated 1                                                        | -3.4  | 10613  |
| <b>ERRF1</b>    | ERBB receptor feedback inhibitor 1                                                | -3.3  | 54206  |
| <b>ESR1</b>     | estrogen receptor 1                                                               | -3.7  | 2099   |
| <b>ESRP2</b>    | epithelial splicing regulatory protein 2                                          | -4.3  | 80004  |
| <b>ETFDH</b>    | electron-transferring-flavoprotein dehydrogenase                                  | -4.6  | 2110   |
| <b>ETNK2</b>    | ethanolamine kinase 2                                                             | -3.1  | 55224  |
| <b>ETS2</b>     | v-ets erythroblastosis virus E26 oncogene homolog 2 (avian)                       | -3.7  | 2114   |
| <b>EVI2A</b>    | ecotropic viral integration site 2A                                               | 5.7   | 2123   |
| <b>EVI2B</b>    | ecotropic viral integration site 2B                                               | 4.6   | 2124   |
| <b>EXPH5</b>    | exophilin 5                                                                       | -4.1  | 23086  |
| <b>F10</b>      | coagulation factor X                                                              | -4.5  | 2159   |
| <b>F11</b>      | coagulation factor XI                                                             | -3.1  | 2160   |
| <b>F12</b>      | coagulation factor XII (Hageman factor)                                           | -12.9 | 2161   |
| <b>F13B</b>     | coagulation factor XIII, B polypeptide                                            | -14.2 | 2165   |
| <b>F2</b>       | coagulation factor II (thrombin)                                                  | -22.7 | 2147   |
| <b>F5</b>       | coagulation factor V (proaccelerin, labile factor)                                | -5.8  | 2153   |
| <b>F7</b>       | coagulation factor VII (serum prothrombin conversion accelerator)                 | -3.1  | 2155   |
| <b>F9</b>       | coagulation factor IX                                                             | -69.1 | 2158   |
| <b>FABP1</b>    | fatty acid binding protein 1, liver                                               | -6.8  | 2168   |
| <b>FABP3</b>    | fatty acid binding protein 3, muscle and heart (mammary-derived growth inhibitor) | 5.6   | 2170   |
| <b>FABP4</b>    | fatty acid binding protein 4, adipocyte                                           | 5.3   | 2167   |
| <b>FABP5</b>    | fatty acid binding protein 5 (psoriasis-associated)                               | 7.0   | 2171   |
| <b>FAM110C</b>  | family with sequence similarity 110, member C                                     | -4.1  | 642273 |
| <b>FAM129A</b>  | family with sequence similarity 129, member A                                     | 3.5   | 116496 |
| <b>FAM150B</b>  | family with sequence similarity 150, member B                                     | 3.4   | 285016 |
| <b>FAM176A</b>  | family with sequence similarity 176, member A                                     | -7.8  | 84141  |
| <b>FAM198A</b>  | family with sequence similarity 198, member A                                     | -5.1  | 729085 |
| <b>FAM20A</b>   | family with sequence similarity 20, member A                                      | -4.3  | 54757  |
| <b>FAM26F</b>   | family with sequence similarity 26, member F                                      | 4.2   | 441168 |
| <b>FAM3B</b>    | family with sequence similarity 3, member B                                       | 3.5   | 54097  |
| <b>FAM46C</b>   | family with sequence similarity 46, member C                                      | 3.3   | 54855  |
| <b>FAM49A</b>   | family with sequence similarity 49, member A                                      | 4.8   | 81553  |
| <b>FAM59A</b>   | family with sequence similarity 59, member A                                      | -3.4  | 64762  |
| <b>FAM60A</b>   | family with sequence similarity 60, member A                                      | 3.2   | 58516  |
| <b>FANCD2</b>   | Fanconi anemia, complementation group D2                                          | 3.2   | 2177   |



|                 |                                                                      |       |        |
|-----------------|----------------------------------------------------------------------|-------|--------|
| <b>FANCI</b>    | Fanconi anemia, complementation group I                              | 3.1   | 55215  |
| <b>FBN1</b>     | fibrillin 1                                                          | 3.1   | 2200   |
| <b>FCER1G</b>   | Fc fragment of IgE, high affinity I, receptor for; gamma polypeptide | 5.7   | 2207   |
| <b>FCGR1B</b>   | Fc fragment of IgG, high affinity Ib, receptor (CD64)                | 3.5   | 2210   |
| <b>FCGR2A</b>   | Fc fragment of IgG, low affinity IIa, receptor (CD32)                | 4.2   | 2212   |
| <b>FCGR2B</b>   | Fc fragment of IgG, low affinity IIb, receptor (CD32)                | 3.7   | 2213   |
| <b>FCGR3B</b>   | Fc fragment of IgG, low affinity IIIb, receptor (CD16b)              | 4.2   | 2215   |
| <b>FCN1</b>     | ficolin (collagen/fibrinogen domain containing) 1                    | 4.0   | 2219   |
| <b>FCRL5</b>    | Fc receptor-like 5                                                   | 10.6  | 83416  |
| <b>FDX1</b>     | ferredoxin 1                                                         | -3.3  | 2230   |
| <b>FER1L4</b>   | fer-1-like 4 (C. elegans) pseudogene                                 | 6.0   | 80307  |
| <b>FERMT1</b>   | fermitin family member 1                                             | 3.1   | 55612  |
| <b>FERMT3</b>   | fermitin family member 3                                             | 3.4   | 83706  |
| <b>FETUB</b>    | fetuin B                                                             | -4.7  | 26998  |
| <b>FGA</b>      | fibrinogen alpha chain                                               | -10.8 | 2243   |
| <b>FGB</b>      | fibrinogen beta chain                                                | -29.5 | 2244   |
| <b>FGD2</b>     | FYVE, RhoGEF and PH domain containing 2                              | 4.6   | 221472 |
| <b>FGD3</b>     | FYVE, RhoGEF and PH domain containing 3                              | 4.6   | 89846  |
| <b>FGF1</b>     | fibroblast growth factor 1 (acidic)                                  | 3.3   | 2246   |
| <b>FGGY</b>     | FGGY carbohydrate kinase domain containing                           | -3.9  | 55277  |
| <b>FGL1</b>     | fibrinogen-like 1                                                    | -10.8 | 2267   |
| <b>FGL2</b>     | fibrinogen-like 2                                                    | 4.1   | 10875  |
| <b>FGR</b>      | Gardner-Rasheed feline sarcoma viral (v-fgr) oncogene homolog        | 3.6   | 2268   |
| <b>FLJ32255</b> | hypothetical LOC643977                                               | 3.8   | 643977 |
| <b>FLNA</b>     | filamin A, alpha                                                     | 3.0   | 2316   |
| <b>FMNL2</b>    | formin-like 2                                                        | 5.2   | 114793 |
| <b>FMO3</b>     | flavin containing monooxygenase 3                                    | -5.5  | 2328   |
| <b>FMO5</b>     | flavin containing monooxygenase 5                                    | -5.7  | 2330   |
| <b>FNDC1</b>    | fibronectin type III domain containing 1                             | 4.3   | 84624  |
| <b>FOLH1</b>    | folate hydrolase (prostate-specific membrane antigen) 1              | -7.8  | 2346   |
| <b>FOLH1B</b>   | folate hydrolase 1B                                                  | -6.3  | 219595 |
| <b>FOLR2</b>    | folate receptor 2 (fetal)                                            | 6.2   | 2350   |
| <b>FOXA1</b>    | forkhead box A1                                                      | -4.8  | 3169   |
| <b>FOXA3</b>    | forkhead box A3                                                      | -7.2  | 3171   |
| <b>FPR3</b>     | formyl peptide receptor 3                                            | 5.1   | 2359   |
| <b>FRAS1</b>    | Fraser syndrome 1                                                    | 3.6   | 80144  |
| <b>FST</b>      | follistatin                                                          | -5.8  | 10468  |
| <b>FSTL1</b>    | follistatin-like 1                                                   | 3.0   | 11167  |
| <b>FTCD</b>     | formiminotransferase cyclodeaminase                                  | -4.6  | 10841  |
| <b>FUT8</b>     | fucosyltransferase 8 (alpha (1,6) fucosyltransferase)                | 3.3   | 2530   |
| <b>FXYD2</b>    | FXYD domain containing ion transport regulator 2                     | 5.2   | 486    |
| <b>FXYD5</b>    | FXYD domain containing ion transport regulator 5                     | 4.3   | 53827  |
| <b>FYB</b>      | FYN binding protein                                                  | 4.9   | 2533   |
| <b>FZD2</b>     | frizzled family receptor 2                                           | 3.1   | 2535   |
| <b>FZD5</b>     | frizzled family receptor 5                                           | -4.0  | 7855   |
| <b>G6PC</b>     | glucose-6-phosphatase, catalytic subunit                             | -4.0  | 2538   |
| <b>GABRP</b>    | gamma-aminobutyric acid (GABA) A receptor, pi                        | 7.4   | 2568   |
| <b>GADD45G</b>  | growth arrest and DNA-damage-inducible, gamma                        | -6.0  | 10912  |
| <b>GAS2</b>     | growth arrest-specific 2                                             | -4.6  | 2620   |
| <b>GAS7</b>     | growth arrest-specific 7                                             | 4.1   | 8522   |
| <b>GATM</b>     | glycine amidinotransferase (L-arginine:glycine amidinotransferase)   | -3.6  | 2628   |
| <b>GBA3</b>     | glucosidase, beta, acid 3 (cytosolic)                                | -7.3  | 57733  |
| <b>GBP5</b>     | guanylate binding protein 5                                          | 3.6   | 115362 |
| <b>GCDH</b>     | glutaryl-CoA dehydrogenase                                           | -3.4  | 2639   |
| <b>GCGR</b>     | glucagon receptor                                                    | -3.3  | 2642   |
| <b>GCHI</b>     | GTP cyclohydrolase 1                                                 | -3.4  | 2643   |

|                |                                                                             |       |        |
|----------------|-----------------------------------------------------------------------------|-------|--------|
| <b>GCKR</b>    | glucokinase (hexokinase 4) regulator                                        | -3.1  | 2646   |
| <b>GCSH</b>    | glycine cleavage system protein H (aminomethyl carrier)                     | -3.3  | 2653   |
| <b>GFRA1</b>   | GDNF family receptor alpha 1                                                | -4.1  | 2674   |
| <b>GGCX</b>    | gamma-glutamyl carboxylase                                                  | -4.4  | 2677   |
| <b>GGH</b>     | gamma-glutamyl hydrolase (conjugase, foylpolypolyglutamyl hydrolase)        | -7.3  | 8836   |
| <b>GGTA1P</b>  | glycoprotein, alpha-galactosyltransferase 1 pseudogene                      | 4.9   | 2681   |
| <b>GHR</b>     | growth hormone receptor                                                     | -14.3 | 2690   |
| <b>GIMAP1</b>  | GTPase, IMAP family member 1                                                | 4.1   | 170575 |
| <b>GIMAP4</b>  | GTPase, IMAP family member 4                                                | 3.4   | 55303  |
| <b>GIMAP7</b>  | GTPase, IMAP family member 7                                                | 4.1   | 168537 |
| <b>GJA4</b>    | gap junction protein, alpha 4, 37kDa                                        | 4.2   | 2701   |
| <b>GJB1</b>    | gap junction protein, beta 1, 32kDa                                         | -3.3  | 2705   |
| <b>GJB2</b>    | gap junction protein, beta 2, 26kDa                                         | -8.3  | 2706   |
| <b>GLCCII</b>  | glucocorticoid induced transcript 1                                         | 4.2   | 113263 |
| <b>GLDC</b>    | glycine dehydrogenase (decarboxylating)                                     | -3.9  | 2731   |
| <b>GLIPR1</b>  | GLI pathogenesis-related 1                                                  | 3.6   | 11010  |
| <b>GLS2</b>    | glutaminase 2 (liver, mitochondrial)                                        | -8.1  | 27165  |
| <b>GLT1D1</b>  | glycosyltransferase 1 domain containing 1                                   | -3.3  | 144423 |
| <b>GLUD1</b>   | glutamate dehydrogenase 1                                                   | -5.1  | 2746   |
| <b>GLUD2</b>   | glutamate dehydrogenase 2                                                   | -4.2  | 2747   |
| <b>GLYAT</b>   | glycine-N-acyltransferase                                                   | -5.1  | 10249  |
| <b>GLYATL1</b> | glycine-N-acyltransferase-like 1                                            | -11.4 | 92292  |
| <b>GLYCTK</b>  | glycerate kinase                                                            | -3.0  | 132158 |
| <b>GM2A</b>    | GM2 ganglioside activator                                                   | 3.5   | 2760   |
| <b>GMFG</b>    | glia maturation factor, gamma                                               | 4.3   | 9535   |
| <b>GNE</b>     | glucosamine (UDP-N-acetyl)-2-epimerase/N-acetylmannosamine kinase           | -7.3  | 10020  |
| <b>GNLY</b>    | granulysin                                                                  | 5.7   | 10578  |
| <b>GNMT</b>    | glycine N-methyltransferase                                                 | -33.7 | 27232  |
| <b>GOLIM4</b>  | golgi integral membrane protein 4                                           | -3.2  | 27333  |
| <b>GOLT1A</b>  | golgi transport 1A                                                          | -4.0  | 127845 |
| <b>GOT1</b>    | glutamic-oxaloacetic transaminase 1, soluble (aspartate aminotransferase 1) | -4.6  | 2805   |
| <b>GPAM</b>    | glycerol-3-phosphate acyltransferase, mitochondrial                         | -8.7  | 57678  |
| <b>GPHN</b>    | gephyrin                                                                    | -3.2  | 10243  |
| <b>GPLD1</b>   | glycosylphosphatidylinositol specific phospholipase D1                      | -3.8  | 2822   |
| <b>GPNMB</b>   | glycoprotein (transmembrane) nmb                                            | 10.2  | 10457  |
| <b>GPR125</b>  | G protein-coupled receptor 125                                              | -4.5  | 166647 |
| <b>GPR128</b>  | G protein-coupled receptor 128                                              | -5.5  | 84873  |
| <b>GPR137B</b> | G protein-coupled receptor 137B                                             | 3.2   | 7107   |
| <b>GPR171</b>  | G protein-coupled receptor 171                                              | 8.0   | 29909  |
| <b>GPR18</b>   | G protein-coupled receptor 18                                               | 3.2   | 2841   |
| <b>GPR34</b>   | G protein-coupled receptor 34                                               | 3.2   | 2857   |
| <b>GPR37</b>   | G protein-coupled receptor 37 (endothelin receptor type B-like)             | -9.2  | 2861   |
| <b>GPR65</b>   | G protein-coupled receptor 65                                               | 3.4   | 8477   |
| <b>GPR88</b>   | G protein-coupled receptor 88                                               | -5.9  | 54112  |
| <b>GPR98</b>   | G protein-coupled receptor 98                                               | -6.7  | 84059  |
| <b>GPRC5B</b>  | G protein-coupled receptor, family C, group 5, member B                     | 3.3   | 51704  |
| <b>GPX1</b>    | glutathione peroxidase 1                                                    | 3.1   | 2876   |
| <b>GPX8</b>    | glutathione peroxidase 8 (putative)                                         | 3.1   | 493869 |
| <b>GRAMD1C</b> | GRAM domain containing 1C                                                   | -4.6  | 54762  |
| <b>GRB14</b>   | growth factor receptor-bound protein 14                                     | -6.9  | 2888   |
| <b>GREM2</b>   | gremlin 2                                                                   | -4.6  | 64388  |
| <b>GRHL1</b>   | grainyhead-like 1 (Drosophila)                                              | -6.8  | 29841  |
| <b>GRN</b>     | granulin                                                                    | 4.7   | 2896   |

|                 |                                                                              |       |        |
|-----------------|------------------------------------------------------------------------------|-------|--------|
| <b>GRTP1</b>    | growth hormone regulated TBC protein 1                                       | -6.6  | 79774  |
| <b>GSTP1</b>    | glutathione S-transferase pi 1                                               | 3.9   | 2950   |
| <b>GULP1</b>    | GULP, engulfment adaptor PTB domain containing 1                             | 3.8   | 51454  |
| <b>GUSBP11</b>  | glucuronidase, beta pseudogene 11                                            | 6.6   | 91316  |
| <b>GVINP1</b>   | GTPase, very large interferon inducible pseudogene 1                         | 4.0   | 387751 |
| <b>GYG2</b>     | glycogenin 2                                                                 | -5.5  | 8908   |
| <b>GYS2</b>     | glycogen synthase 2 (liver)                                                  | -16.2 | 2998   |
| <b>GZMA</b>     | granzyme A (granzyme 1, cytotoxic T-lymphocyte-associated serine esterase 3) | 11.6  | 3001   |
| <b>GZMB</b>     | granzyme B (granzyme 2, cytotoxic T-lymphocyte-associated serine esterase 1) | 12.7  | 3002   |
| <b>GZMH</b>     | granzyme H (cathepsin G-like 2, protein h-CCPX)                              | 7.1   | 2999   |
| <b>GZMK</b>     | granzyme K (granzyme 3; tryptase II)                                         | 5.3   | 3003   |
| <b>H2AFY</b>    | H2A histone family, member Y                                                 | 3.3   | 9555   |
| <b>HABP2</b>    | hyaluronan binding protein 2                                                 | -3.8  | 3026   |
| <b>HAL</b>      | histidine ammonia-lyase                                                      | -25.1 | 3034   |
| <b>HAMP</b>     | hepcidin antimicrobial peptide                                               | -14.0 | 57817  |
| <b>HAO1</b>     | hydroxyacid oxidase (glycolate oxidase) 1                                    | -13.3 | 54363  |
| <b>HAO2</b>     | hydroxyacid oxidase 2 (long chain)                                           | -16.5 | 51179  |
| <b>HAVCR2</b>   | hepatitis A virus cellular receptor 2                                        | 5.8   | 84868  |
| <b>HCK</b>      | hemopoietic cell kinase                                                      | 4.5   | 3055   |
| <b>HCLS1</b>    | hematopoietic cell-specific Lyn substrate 1                                  | 5.5   | 3059   |
| <b>HCST</b>     | hematopoietic cell signal transducer                                         | 3.5   | 10870  |
| <b>HEPH</b>     | hephaestin                                                                   | 4.9   | 9843   |
| <b>HEYL</b>     | hairy/enhancer-of-split related with YRPW motif-like                         | 4.4   | 26508  |
| <b>HFE2</b>     | hemochromatosis type 2 (juvenile)                                            | -14.0 | 148738 |
| <b>HGD</b>      | homogentisate 1,2-dioxygenase                                                | -4.2  | 3081   |
| <b>HGFAC</b>    | HGF activator                                                                | -4.7  | 3083   |
| <b>HIBADH</b>   | 3-hydroxyisobutyrate dehydrogenase                                           | -3.2  | 11112  |
| <b>HIGD1A</b>   | HIG1 hypoxia inducible domain family, member 1A                              | -3.1  | 25994  |
| <b>HK1</b>      | hexokinase 1                                                                 | 3.1   | 3098   |
| <b>HLA-DMA</b>  | major histocompatibility complex, class II, DM alpha                         | 9.8   | 3108   |
| <b>HLA-DMB</b>  | major histocompatibility complex, class II, DM beta                          | 6.0   | 3109   |
| <b>HLA-DOA</b>  | major histocompatibility complex, class II, DO alpha                         | 8.1   | 3111   |
| <b>HLA-DPA1</b> | major histocompatibility complex, class II, DP alpha 1                       | 6.3   | 3113   |
| <b>HLA-DPB1</b> | major histocompatibility complex, class II, DP beta 1                        | 8.7   | 3115   |
| <b>HLA-DQA1</b> | major histocompatibility complex, class II, DQ alpha 1                       | 14.4  | 3117   |
| <b>HLA-DQB1</b> | major histocompatibility complex, class II, DQ beta 1                        | 7.3   | 3119   |
| <b>HLA-DRA</b>  | major histocompatibility complex, class II, DR alpha                         | 7.2   | 3122   |
| <b>HLA-DRB6</b> | major histocompatibility complex, class II, DR beta 6 (pseudogene)           | 3.0   | 3128   |
| <b>HLF</b>      | hepatic leukemia factor                                                      | -3.6  | 3131   |
| <b>HMCN1</b>    | hemicentin 1                                                                 | 3.4   | 83872  |
| <b>HMGCS2</b>   | 3-hydroxy-3-methylglutaryl-CoA synthase 2 (mitochondrial)                    | -11.7 | 3158   |
| <b>HMHA1</b>    | histocompatibility (minor) HA-1                                              | 4.2   | 23526  |
| <b>HMOX1</b>    | heme oxygenase (decycling) 1                                                 | 3.9   | 3162   |
| <b>HNF4A</b>    | hepatocyte nuclear factor 4, alpha                                           | -5.1  | 3172   |
| <b>HNF4G</b>    | hepatocyte nuclear factor 4, gamma                                           | -3.3  | 3174   |
| <b>HOOK1</b>    | hook homolog 1 (Drosophila)                                                  | -4.6  | 51361  |
| <b>HOPX</b>     | HOP homeobox                                                                 | 4.3   | 84525  |
| <b>HPD</b>      | 4-hydroxyphenylpyruvate dioxygenase                                          | -5.4  | 3242   |
| <b>HPGD</b>     | hydroxyprostaglandin dehydrogenase 15-(NAD)                                  | -11.7 | 3248   |
| <b>HPN</b>      | hepsin                                                                       | -10.0 | 3249   |
| <b>HPR</b>      | haptoglobin-related protein                                                  | -24.2 | 3250   |
| <b>HPX</b>      | hemopexin                                                                    | -32.7 | 3263   |
| <b>HRG</b>      | histidine-rich glycoprotein                                                  | -13.7 | 3273   |
| <b>HRSP12</b>   | heat-responsive protein 12                                                   | -6.4  | 10247  |

|                |                                                                                                       |       |        |
|----------------|-------------------------------------------------------------------------------------------------------|-------|--------|
| <b>HS3ST1</b>  | heparan sulfate (glucosamine) 3-O-sulfotransferase 1                                                  | 3.8   | 9957   |
| <b>HS3ST2</b>  | heparan sulfate (glucosamine) 3-O-sulfotransferase 2                                                  | 3.4   | 9956   |
| <b>HSD11B1</b> | hydroxysteroid (11-beta) dehydrogenase 1                                                              | -6.8  | 3290   |
| <b>HSD17B6</b> | hydroxysteroid (17-beta) dehydrogenase 6 homolog (mouse)                                              | -53.4 | 8630   |
| <b>HSPA2</b>   | heat shock 70kDa protein 2                                                                            | 4.0   | 3306   |
| <b>HYAL1</b>   | hyaluronoglucosaminidase 1                                                                            | -3.4  | 3373   |
| <b>ICAM2</b>   | intercellular adhesion molecule 2                                                                     | 3.0   | 3384   |
| <b>ID2</b>     | inhibitor of DNA binding 2, dominant negative helix-loop-helix protein                                | -3.1  | 3398   |
| <b>IDII</b>    | isopentenyl-diphosphate delta isomerase 1                                                             | -3.2  | 3422   |
| <b>IFI16</b>   | interferon, gamma-inducible protein 16                                                                | 4.2   | 3428   |
| <b>IFI27</b>   | interferon, alpha-inducible protein 27                                                                | 5.8   | 3429   |
| <b>IFI30</b>   | interferon, gamma-inducible protein 30                                                                | 4.4   | 10437  |
| <b>IFITM10</b> | interferon induced transmembrane protein 10                                                           | 3.4   | 402778 |
| <b>IGF1</b>    | insulin-like growth factor 1 (somatomedin C)                                                          | -6.3  | 3479   |
| <b>IGF2BP3</b> | insulin-like growth factor 2 mRNA binding protein 3                                                   | 3.3   | 10643  |
| <b>IGFALS</b>  | insulin-like growth factor binding protein, acid labile subunit                                       | -3.2  | 3483   |
| <b>IGFBP1</b>  | insulin-like growth factor binding protein 1                                                          | -11.0 | 3484   |
| <b>IGFBP2</b>  | insulin-like growth factor binding protein 2, 36kDa                                                   | -4.8  | 3485   |
| <b>IGHD</b>    | immunoglobulin heavy constant delta                                                                   | 5.3   | 3495   |
| <b>IGHM</b>    | immunoglobulin heavy constant mu                                                                      | 12.5  | 3507   |
| <b>IGJ</b>     | immunoglobulin J polypeptide, linker protein for immunoglobulin alpha and mu polypeptides             | 15.6  | 3512   |
| <b>IGKC</b>    | immunoglobulin kappa constant                                                                         | 13.0  | 3514   |
| <b>IGKV1-5</b> | immunoglobulin kappa variable 1-5                                                                     | 11.9  | 28299  |
| <b>IGKV4-1</b> | immunoglobulin kappa variable 4-1                                                                     | 7.3   | 28908  |
| <b>IGL@</b>    | immunoglobulin lambda locus                                                                           | 4.0   | 3535   |
| <b>IGLJ3</b>   | immunoglobulin lambda joining 3                                                                       | 5.5   | 28831  |
| <b>IGLL3P</b>  | immunoglobulin lambda-like polypeptide 3, pseudogene                                                  | 10.1  | 91353  |
| <b>IGSF6</b>   | immunoglobulin superfamily, member 6                                                                  | 6.8   | 10261  |
| <b>IL10RA</b>  | interleukin 10 receptor, alpha                                                                        | 6.6   | 3587   |
| <b>IL12RB1</b> | interleukin 12 receptor, beta 1                                                                       | 3.0   | 3594   |
| <b>IL17RB</b>  | interleukin 17 receptor B                                                                             | -3.3  | 55540  |
| <b>IL18</b>    | interleukin 18 (interferon-gamma-inducing factor)                                                     | 8.1   | 3606   |
| <b>IL1RAP</b>  | interleukin 1 receptor accessory protein                                                              | -10.0 | 3556   |
| <b>IL1RL1</b>  | interleukin 1 receptor-like 1                                                                         | 3.4   | 9173   |
| <b>IL1RN</b>   | interleukin 1 receptor antagonist                                                                     | -4.1  | 3557   |
| <b>IL21R</b>   | interleukin 21 receptor                                                                               | 3.4   | 50615  |
| <b>IL28RA</b>  | interleukin 28 receptor, alpha (interferon, lambda receptor)                                          | -3.2  | 163702 |
| <b>IL7R</b>    | interleukin 7 receptor                                                                                | 7.1   | 3575   |
| <b>INHBA</b>   | inhibin, beta A                                                                                       | -3.4  | 3624   |
| <b>INHBE</b>   | inhibin, beta E                                                                                       | -18.0 | 83729  |
| <b>INPP5D</b>  | inositol polyphosphate-5-phosphatase, 145kDa                                                          | 3.7   | 3635   |
| <b>INSIG1</b>  | insulin induced gene 1                                                                                | -7.8  | 3638   |
| <b>IPCEF1</b>  | interaction protein for cytohesin exchange factors 1                                                  | 3.7   | 26034  |
| <b>IPW</b>     | imprinted in Prader-Willi syndrome (non-protein coding)                                               | 3.3   | 3653   |
| <b>IQGAP1</b>  | IQ motif containing GTPase activating protein 1                                                       | 3.4   | 8826   |
| <b>IRAK3</b>   | interleukin-1 receptor-associated kinase 3                                                            | 3.5   | 11213  |
| <b>ISG20</b>   | interferon stimulated exonuclease gene 20kDa                                                          | 4.1   | 3669   |
| <b>ISM1</b>    | isthmin 1 homolog (zebrafish)                                                                         | -6.5  | 140862 |
| <b>ISOC1</b>   | isochorismatase domain containing 1                                                                   | -4.6  | 51015  |
| <b>ITCH</b>    | itchy E3 ubiquitin protein ligase homolog (mouse)                                                     | -4.4  | 83737  |
| <b>ITGA2</b>   | integrin, alpha 2 (CD49B, alpha 2 subunit of VLA-2 receptor)                                          | 7.8   | 3673   |
| <b>ITGAL</b>   | integrin, alpha L (antigen CD11A (p180), lymphocyte function-associated antigen 1; alpha polypeptide) | 3.8   | 3683   |
| <b>ITGB2</b>   | integrin, beta 2 (complement component 3 receptor 3 and 4 subunit)                                    | 4.4   | 3689   |

|                 |                                                                                           |       |        |
|-----------------|-------------------------------------------------------------------------------------------|-------|--------|
| <b>ITGB6</b>    | integrin, beta 6                                                                          | 3.8   | 3694   |
| <b>ITGB8</b>    | integrin, beta 8                                                                          | 4.2   | 3696   |
| <b>ITGBL1</b>   | integrin, beta-like 1 (with EGF-like repeat domains)                                      | 4.4   | 9358   |
| <b>ITIH1</b>    | inter-alpha (globulin) inhibitor H1                                                       | -19.5 | 3697   |
| <b>ITIH2</b>    | inter-alpha (globulin) inhibitor H2                                                       | -6.3  | 3698   |
| <b>ITIH3</b>    | inter-alpha (globulin) inhibitor H3                                                       | -9.3  | 3699   |
| <b>ITIH4</b>    | inter-alpha (globulin) inhibitor H4 (plasma Kallikrein-sensitive glycoprotein)            | -6.5  | 3700   |
| <b>ITK</b>      | IL2-inducible T-cell kinase                                                               | 4.1   | 3702   |
| <b>ITLN1</b>    | intelectin 1 (galactofuranose binding)                                                    | 4.3   | 55600  |
| <b>ITM2A</b>    | integral membrane protein 2A                                                              | 3.5   | 9452   |
| <b>ITM2C</b>    | integral membrane protein 2C                                                              | 3.3   | 81618  |
| <b>JAK3</b>     | Janus kinase 3                                                                            | 4.6   | 3718   |
| <b>JMJD5</b>    | jumonji domain containing 5                                                               | -3.5  | 79831  |
| <b>KANK4</b>    | KN motif and ankyrin repeat domains 4                                                     | -3.4  | 163782 |
| <b>KBTBD11</b>  | kelch repeat and BTB (POZ) domain containing 11                                           | -3.4  | 9920   |
| <b>KCNA3</b>    | potassium voltage-gated channel, shaker-related subfamily, member 3                       | 3.2   | 3738   |
| <b>KCND3</b>    | potassium voltage-gated channel, Shal-related subfamily, member 3                         | -6.1  | 3752   |
| <b>KCNJ16</b>   | potassium inwardly-rectifying channel, subfamily J, member 16                             | 3.2   | 3773   |
| <b>KCNN2</b>    | potassium intermediate/small conductance calcium-activated channel, subfamily N, member 2 | -8.9  | 3781   |
| <b>KCNT2</b>    | potassium channel, subfamily T, member 2                                                  | -3.6  | 343450 |
| <b>KCTD12</b>   | potassium channel tetramerisation domain containing 12                                    | 3.4   | 115207 |
| <b>KDM4C</b>    | lysine (K)-specific demethylase 4C                                                        | -4.8  | 23081  |
| <b>KDSR</b>     | 3-ketodihydrospingosine reductase                                                         | -3.1  | 2531   |
| <b>KHK</b>      | ketoheksokinase (fructokinase)                                                            | -5.1  | 3795   |
| <b>KIAA0101</b> | KIAA0101                                                                                  | 3.6   | 9768   |
| <b>KIAA0125</b> | KIAA0125                                                                                  | 6.7   | 9834   |
| <b>KIAA0226</b> | KIAA0226                                                                                  | 3.1   | 9711   |
| <b>KIF11</b>    | kinesin family member 11                                                                  | 4.4   | 3832   |
| <b>KIF16B</b>   | kinesin family member 16B                                                                 | -3.0  | 55614  |
| <b>KIF21A</b>   | kinesin family member 21A                                                                 | -3.2  | 55605  |
| <b>KIF4A</b>    | kinesin family member 4A                                                                  | 3.3   | 24137  |
| <b>KLB</b>      | klotho beta                                                                               | -12.1 | 152831 |
| <b>KLF15</b>    | Kruppel-like factor 15                                                                    | -4.3  | 28999  |
| <b>KLF5</b>     | Kruppel-like factor 5 (intestinal)                                                        | 3.0   | 688    |
| <b>KLHL6</b>    | kelch-like 6 (Drosophila)                                                                 | 5.7   | 89857  |
| <b>KLKB1</b>    | kallikrein B, plasma (Fletcher factor) 1                                                  | -10.8 | 3818   |
| <b>KLRB1</b>    | killer cell lectin-like receptor subfamily B, member 1                                    | 3.5   | 3820   |
| <b>KLRK1</b>    | killer cell lectin-like receptor subfamily K, member 1                                    | 5.5   | 22914  |
| <b>KNG1</b>     | kininogen 1                                                                               | -18.5 | 3827   |
| <b>KRT19</b>    | keratin 19                                                                                | 51.4  | 3880   |
| <b>KRT23</b>    | keratin 23 (histone deacetylase inducible)                                                | 16.9  | 25984  |
| <b>KRT7</b>     | keratin 7                                                                                 | 20.7  | 3855   |
| <b>LACTB2</b>   | lactamase, beta 2                                                                         | -3.6  | 51110  |
| <b>LAIR1</b>    | leukocyte-associated immunoglobulin-like receptor 1                                       | 3.7   | 3903   |
| <b>LAMA2</b>    | laminin, alpha 2                                                                          | 3.2   | 3908   |
| <b>LAMB1</b>    | laminin, beta 1                                                                           | 4.1   | 3912   |
| <b>LAMC2</b>    | laminin, gamma 2                                                                          | 3.7   | 3918   |
| <b>LAPTM5</b>   | lysosomal protein transmembrane 5                                                         | 5.3   | 7805   |
| <b>LARP1B</b>   | La ribonucleoprotein domain family, member 1B                                             | -4.2  | 55132  |
| <b>LAX1</b>     | lymphocyte transmembrane adaptor 1                                                        | 5.2   | 54900  |
| <b>LAYN</b>     | layilin                                                                                   | 3.2   | 143903 |
| <b>LBH</b>      | limb bud and heart development homolog (mouse)                                            | 3.5   | 81606  |
| <b>LBP</b>      | lipopolysaccharide binding protein                                                        | -18.0 | 3929   |

|                     |                                                                                          |       |          |
|---------------------|------------------------------------------------------------------------------------------|-------|----------|
| <b>LCAT</b>         | lecithin-cholesterol acyltransferase                                                     | -4.4  | 3931     |
| <b>LCK</b>          | lymphocyte-specific protein tyrosine kinase                                              | 4.1   | 3932     |
| <b>LDHB</b>         | lactate dehydrogenase B                                                                  | 4.2   | 3945     |
| <b>LDHD</b>         | lactate dehydrogenase D                                                                  | -4.1  | 197257   |
| <b>LDLR</b>         | low density lipoprotein receptor                                                         | -5.9  | 3949     |
| <b>LEAP2</b>        | liver expressed antimicrobial peptide 2                                                  | -9.7  | 116842   |
| <b>LECT2</b>        | leukocyte cell-derived chemotaxin 2                                                      | -14.2 | 3950     |
| <b>LEF1</b>         | lymphoid enhancer-binding factor 1                                                       | 3.4   | 51176    |
| <b>LEPR</b>         | leptin receptor                                                                          | -4.0  | 3953     |
| <b>LGALS1</b>       | lectin, galactoside-binding, soluble, 1                                                  | 5.4   | 3956     |
| <b>LGALS3</b>       | lectin, galactoside-binding, soluble, 3                                                  | 3.4   | 3958     |
| <b>LGALS3BP</b>     | lectin, galactoside-binding, soluble, 3 binding protein                                  | 3.5   | 3959     |
| <b>LGMN</b>         | legumain                                                                                 | 3.0   | 5641     |
| <b>LGR4</b>         | leucine-rich repeat containing G protein-coupled receptor 4                              | -7.9  | 55366    |
| <b>LILRA2</b>       | leukocyte immunoglobulin-like receptor, subfamily A (with TM domain), member 2           | 3.1   | 11027    |
| <b>LILRB1</b>       | leukocyte immunoglobulin-like receptor, subfamily B (with TM and ITIM domains), member 1 | 5.4   | 10859    |
| <b>LILRB2</b>       | leukocyte immunoglobulin-like receptor, subfamily B (with TM and ITIM domains), member 2 | 6.9   | 10288    |
| <b>LINC00261</b>    | long intergenic non-protein coding RNA 261                                               | -4.5  | 140828   |
| <b>LINC00342</b>    | long intergenic non-protein coding RNA 342                                               | 3.6   | 150759   |
| <b>LIPC</b>         | lipase, hepatic                                                                          | -10.1 | 3990     |
| <b>LIPG</b>         | lipase, endothelial                                                                      | -6.4  | 9388     |
| <b>LMAN1</b>        | lectin, mannose-binding, 1                                                               | -3.1  | 3998     |
| <b>LNX2</b>         | ligand of numb-protein X 2                                                               | -3.3  | 222484   |
| <b>LOC100130232</b> | LP2209                                                                                   | -7.3  | 1E+08    |
| <b>LOC100131541</b> | hypothetical LOC100131541                                                                | 3.7   | 1E+08    |
| <b>LOC100132741</b> | hypothetical LOC100132741                                                                | 3.1   | 1E+08    |
| <b>LOC100288911</b> | hypothetical LOC100288911                                                                | 4.5   | 1E+08    |
| <b>LOC100505650</b> | hypothetical LOC100505650                                                                | 4.7   | 1.01E+08 |
| <b>LOC100505746</b> | hypothetical LOC100505746                                                                | 5.6   | 1.01E+08 |
| <b>LOC100506229</b> | hypothetical LOC100506229                                                                | -12.0 | 1.01E+08 |
| <b>LOC100506776</b> | hypothetical LOC100506776                                                                | 4.3   | 1.01E+08 |
| <b>LOC100507307</b> | hypothetical LOC100507307                                                                | 3.1   | 1.01E+08 |
| <b>LOC100507389</b> | hypothetical LOC100507389                                                                | -8.7  | 1.01E+08 |
| <b>LOC100509635</b> | hypothetical LOC100509635                                                                | 3.1   | 1.01E+08 |
| <b>LOC149703</b>    | hypothetical LOC149703                                                                   | -5.1  | 149703   |
| <b>LOC153682</b>    | hypothetical protein LOC153682                                                           | 3.4   | 153682   |
| <b>LOC200772</b>    | hypothetical LOC200772                                                                   | 3.9   | 200772   |
| <b>LOC203274</b>    | hypothetical protein LOC203274                                                           | 3.4   | 203274   |
| <b>LOC255167</b>    | hypothetical LOC255167                                                                   | -3.6  | 255167   |
| <b>LOC283587</b>    | hypothetical protein LOC283587                                                           | -4.2  | 283587   |
| <b>LOC401522</b>    | hypothetical LOC401522                                                                   | 3.4   | 401522   |
| <b>LOC96610</b>     | BMS1 homolog, ribosome assembly protein (yeast) pseudogene                               | 8.1   | 96610    |
| <b>LONP2</b>        | lon peptidase 2, peroxisomal                                                             | -3.2  | 83752    |
| <b>LONRF3</b>       | LON peptidase N-terminal domain and ring finger 3                                        | -3.6  | 79836    |
| <b>LOX</b>          | lysyl oxidase                                                                            | 3.0   | 4015     |
| <b>LOXL1</b>        | lysyl oxidase-like 1                                                                     | 3.4   | 4016     |
| <b>LOXL2</b>        | lysyl oxidase-like 2                                                                     | 4.7   | 4017     |
| <b>LPA</b>          | lipoprotein, Lp(a)                                                                       | -51.9 | 4018     |
| <b>LPCAT1</b>       | lysophosphatidylcholine acyltransferase 1                                                | 3.4   | 79888    |
| <b>LPCAT3</b>       | lysophosphatidylcholine acyltransferase 3                                                | -3.7  | 10162    |
| <b>LPPR1</b>        | lipid phosphate phosphatase-related protein type 1                                       | -3.1  | 54886    |
| <b>LRG1</b>         | leucine-rich alpha-2-glycoprotein 1                                                      | -17.1 | 116844   |
| <b>LRIG1</b>        | leucine-rich repeats and immunoglobulin-like domains 1                                   | -7.7  | 26018    |

|                 |                                                                                       |       |        |
|-----------------|---------------------------------------------------------------------------------------|-------|--------|
| <b>LRP6</b>     | low density lipoprotein receptor-related protein 6                                    | -3.3  | 4040   |
| <b>LRRC1</b>    | leucine rich repeat containing 1                                                      | 3.3   | 55227  |
| <b>LRRC2</b>    | leucine rich repeat containing 2                                                      | -3.0  | 79442  |
| <b>LST1</b>     | leukocyte specific transcript 1                                                       | 4.0   | 7940   |
| <b>LUM</b>      | lumican                                                                               | 7.3   | 4060   |
| <b>LXN</b>      | latexin                                                                               | 9.1   | 56925  |
| <b>LY75</b>     | lymphocyte antigen 75                                                                 | 4.0   | 4065   |
| <b>LY86</b>     | lymphocyte antigen 86                                                                 | 4.7   | 9450   |
| <b>LY9</b>      | lymphocyte antigen 9                                                                  | 3.2   | 4063   |
| <b>LY96</b>     | lymphocyte antigen 96                                                                 | 7.1   | 23643  |
| <b>LYZ</b>      | lysozyme                                                                              | 5.9   | 4069   |
| <b>MAD2L1</b>   | MAD2 mitotic arrest deficient-like 1 (yeast)                                          | 3.5   | 4085   |
| <b>MAML2</b>    | mastermind-like 2 (Drosophila)                                                        | 4.3   | 84441  |
| <b>MAN1A1</b>   | mannosidase, alpha, class 1A, member 1                                                | -4.2  | 4121   |
| <b>MANEA</b>    | mannosidase, endo-alpha                                                               | -3.2  | 79694  |
| <b>MAOA</b>     | monoamine oxidase A                                                                   | -4.8  | 4128   |
| <b>MAP1B</b>    | microtubule-associated protein 1B                                                     | 3.0   | 4131   |
| <b>MAP2</b>     | microtubule-associated protein 2                                                      | 3.4   | 4133   |
| <b>MAP3K8</b>   | mitogen-activated protein kinase kinase 8                                             | 3.6   | 1326   |
| <b>MAP4K1</b>   | mitogen-activated protein kinase kinase kinase 1                                      | 3.1   | 11184  |
| <b>MAP7</b>     | microtubule-associated protein 7                                                      | -3.2  | 9053   |
| <b>MAPK13</b>   | mitogen-activated protein kinase 13                                                   | 3.6   | 5603   |
| <b>MARCH1</b>   | membrane-associated ring finger (C3HC4) 1                                             | 4.7   | 55016  |
| <b>MARCO</b>    | macrophage receptor with collagenous structure                                        | 5.2   | 8685   |
| <b>MASP2</b>    | mannan-binding lectin serine peptidase 2                                              | -8.8  | 10747  |
| <b>MAT1A</b>    | methionine adenosyltransferase I, alpha                                               | -14.9 | 4143   |
| <b>MBL2</b>     | mannose-binding lectin (protein C) 2, soluble                                         | -29.8 | 4153   |
| <b>MCC</b>      | mutated in colorectal cancers                                                         | -4.3  | 4163   |
| <b>MCFD2</b>    | multiple coagulation factor deficiency 2                                              | -3.7  | 90411  |
| <b>MCM5</b>     | minichromosome maintenance complex component 5                                        | 3.4   | 4174   |
| <b>MEG3</b>     | maternally expressed 3 (non-protein coding)                                           | 3.1   | 55384  |
| <b>MEGF9</b>    | multiple EGF-like-domains 9                                                           | -3.3  | 1955   |
| <b>MELK</b>     | maternal embryonic leucine zipper kinase                                              | 4.0   | 9833   |
| <b>MET</b>      | met proto-oncogene (hepatocyte growth factor receptor)                                | -3.2  | 4233   |
| <b>METRNL</b>   | meteorin, glial cell differentiation regulator-like                                   | 3.4   | 284207 |
| <b>MFAP3L</b>   | microfibrillar-associated protein 3-like                                              | -19.7 | 9848   |
| <b>MFI2</b>     | antigen p97 (melanoma associated) identified by monoclonal antibodies 133.2 and 96.5  | 7.0   | 4241   |
| <b>MFSD2A</b>   | major facilitator superfamily domain containing 2A                                    | -5.6  | 84879  |
| <b>MGP</b>      | matrix Gla protein                                                                    | 3.8   | 4256   |
| <b>MGST1</b>    | microsomal glutathione S-transferase 1                                                | -4.7  | 4257   |
| <b>MICAL1</b>   | microtubule associated monooxygenase, calponin and LIM domain containing 1            | 5.1   | 64780  |
| <b>MICB</b>     | MHC class I polypeptide-related sequence B                                            | 4.0   | 4277   |
| <b>MIR143HG</b> | MIR143 host gene (non-protein coding)                                                 | 3.4   | 728264 |
| <b>MIS18BP1</b> | MIS18 binding protein 1                                                               | 3.3   | 55320  |
| <b>MKI67</b>    | antigen identified by monoclonal antibody Ki-67                                       | 3.9   | 4288   |
| <b>MLIP</b>     | muscular LMNA-interacting protein                                                     | -5.2  | 90523  |
| <b>MLXIPL</b>   | MLX interacting protein-like                                                          | -5.5  | 51085  |
| <b>MMAA</b>     | methylmalonic aciduria (cobalamin deficiency) cblA type                               | -3.4  | 166785 |
| <b>MMAB</b>     | methylmalonic aciduria (cobalamin deficiency) cblB type                               | -3.4  | 326625 |
| <b>MME</b>      | membrane metallo-endorpeptidase                                                       | -5.2  | 4311   |
| <b>MMP2</b>     | matrix metallopeptidase 2 (gelatinase A, 72kDa gelatinase, 72kDa type IV collagenase) | 4.8   | 4313   |
| <b>MMP7</b>     | matrix metallopeptidase 7 (matrilysin, uterine)                                       | 27.6  | 4316   |
| <b>MOBK2A</b>   | MOB1, Mps One Binder kinase activator-like 2A (yeast)                                 | 3.4   | 126308 |

|                |                                                                                                                                         |       |        |
|----------------|-----------------------------------------------------------------------------------------------------------------------------------------|-------|--------|
| <b>MOCOS</b>   | molybdenum cofactor sulfurase                                                                                                           | -5.7  | 55034  |
| <b>MOSC1</b>   | MOCO sulphurase C-terminal domain containing 1                                                                                          | -3.3  | 64757  |
| <b>MOSC2</b>   | MOCO sulphurase C-terminal domain containing 2                                                                                          | -7.8  | 54996  |
| <b>MOXD1</b>   | monooxygenase, DBH-like 1                                                                                                               | 3.7   | 26002  |
| <b>MPEGI</b>   | macrophage expressed 1                                                                                                                  | 6.0   | 219972 |
| <b>MRAS</b>    | muscle RAS oncogene homolog                                                                                                             | 3.0   | 22808  |
| <b>MRC2</b>    | mannose receptor, C type 2                                                                                                              | 3.9   | 9902   |
| <b>MS4A1</b>   | membrane-spanning 4-domains, subfamily A, member 1                                                                                      | 3.1   | 931    |
| <b>MS4A14</b>  | membrane-spanning 4-domains, subfamily A, member 14                                                                                     | 4.8   | 84689  |
| <b>MS4A4A</b>  | membrane-spanning 4-domains, subfamily A, member 4                                                                                      | 6.6   | 51338  |
| <b>MS4A6A</b>  | membrane-spanning 4-domains, subfamily A, member 6A                                                                                     | 4.4   | 64231  |
| <b>MS4A7</b>   | membrane-spanning 4-domains, subfamily A, member 7                                                                                      | 7.0   | 58475  |
| <b>MSMO1</b>   | methylsterol monooxygenase 1                                                                                                            | -5.8  | 6307   |
| <b>MST1</b>    | macrophage stimulating 1 (hepatocyte growth factor-like)                                                                                | -6.5  | 4485   |
| <b>MST1P9</b>  | macrophage stimulating 1 (hepatocyte growth factor-like) pseudogene 9                                                                   | -4.6  | 11223  |
| <b>MT1F</b>    | metallothionein 1F                                                                                                                      | -3.6  | 4494   |
| <b>MT1G</b>    | metallothionein 1G                                                                                                                      | -3.9  | 4495   |
| <b>MT1H</b>    | metallothionein 1H                                                                                                                      | -3.1  | 4496   |
| <b>MT1M</b>    | metallothionein 1M                                                                                                                      | -6.7  | 4499   |
| <b>MT1X</b>    | metallothionein 1X                                                                                                                      | -3.1  | 4501   |
| <b>MTFR1</b>   | mitochondrial fission regulator 1                                                                                                       | -3.7  | 9650   |
| <b>MTHFD1</b>  | methylenetetrahydrofolate dehydrogenase (NADP+ dependent) 1, methenyltetrahydrofolate cyclohydrolase, formyltetrahydrofolate synthetase | -3.3  | 4522   |
| <b>MTHFD2</b>  | methylenetetrahydrofolate dehydrogenase (NADP+ dependent) 2, methenyltetrahydrofolate cyclohydrolase                                    | 4.5   | 10797  |
| <b>MTHFD2L</b> | methylenetetrahydrofolate dehydrogenase (NADP+ dependent) 2-like                                                                        | -4.2  | 441024 |
| <b>MTHFS</b>   | 5,10-methenyltetrahydrofolate synthetase (5-formyltetrahydrofolate cyclo-ligase)                                                        | -3.9  | 10588  |
| <b>MTTP</b>    | microsomal triglyceride transfer protein                                                                                                | -13.5 | 4547   |
| <b>MUT</b>     | methylmalonyl CoA mutase                                                                                                                | -3.7  | 4594   |
| <b>MX2</b>     | myxovirus (influenza virus) resistance 2 (mouse)                                                                                        | 3.1   | 4600   |
| <b>MXRA8</b>   | matrix-remodelling associated 8                                                                                                         | 3.3   | 54587  |
| <b>MYBL1</b>   | v-myb myeloblastosis viral oncogene homolog (avian)-like 1                                                                              | 3.3   | 4603   |
| <b>MYL9</b>    | myosin, light chain 9, regulatory                                                                                                       | 4.5   | 10398  |
| <b>MYO10</b>   | myosin X                                                                                                                                | 3.2   | 4651   |
| <b>MYO1B</b>   | myosin IB                                                                                                                               | -3.7  | 4430   |
| <b>MYO5A</b>   | myosin VA (heavy chain 12, myosin)                                                                                                      | 3.6   | 4644   |
| <b>MYOM1</b>   | myomesin 1, 185kDa                                                                                                                      | -6.0  | 8736   |
| <b>MYRIP</b>   | myosin VIIA and Rab interacting protein                                                                                                 | -5.7  | 25924  |
| <b>MZB1</b>    | marginal zone B and B1 cell-specific protein                                                                                            | 17.6  | 51237  |
| <b>N4BP2</b>   | NEDD4 binding protein 2                                                                                                                 | -3.9  | 55728  |
| <b>NADKD1</b>  | NAD kinase domain containing 1                                                                                                          | -6.8  | 133686 |
| <b>NAGS</b>    | N-acetylglutamate synthase                                                                                                              | -3.3  | 162417 |
| <b>NALCN</b>   | sodium leak channel, non-selective                                                                                                      | 4.0   | 259232 |
| <b>NAMPT</b>   | nicotinamide phosphoribosyltransferase                                                                                                  | -4.6  | 10135  |
| <b>NAT2</b>    | N-acetyltransferase 2 (arylamine N-acetyltransferase)                                                                                   | -7.0  | 10     |
| <b>NCAPG</b>   | non-SMC condensin I complex, subunit G                                                                                                  | 3.6   | 64151  |
| <b>NCEH1</b>   | neutral cholesterol ester hydrolase 1                                                                                                   | 4.5   | 57552  |
| <b>NCF1C</b>   | neutrophil cytosolic factor 1C pseudogene                                                                                               | 4.8   | 654817 |
| <b>NCF2</b>    | neutrophil cytosolic factor 2                                                                                                           | 5.0   | 4688   |
| <b>NCF4</b>    | neutrophil cytosolic factor 4, 40kDa                                                                                                    | 4.3   | 4689   |
| <b>NDC80</b>   | NDC80 homolog, kinetochore complex component ( <i>S. cerevisiae</i> )                                                                   | 5.0   | 10403  |
| <b>NEK6</b>    | NIMA (never in mitosis gene a)-related kinase 6                                                                                         | -3.3  | 10783  |



|                 |                                                                     |       |        |
|-----------------|---------------------------------------------------------------------|-------|--------|
| <i>NEXN</i>     | nexilin (F actin binding protein)                                   | 4.6   | 91624  |
| <i>NFIA</i>     | nuclear factor I/A                                                  | -3.1  | 4774   |
| <i>NFIL3</i>    | nuclear factor, interleukin 3 regulated                             | -3.2  | 4783   |
| <i>NGEF</i>     | neuronal guanine nucleotide exchange factor                         | -3.2  | 25791  |
| <i>NID2</i>     | nidogen 2 (osteonidogen)                                            | 3.1   | 22795  |
| <i>NKG7</i>     | natural killer cell group 7 sequence                                | 6.0   | 4818   |
| <i>NLRC3</i>    | NLR family, CARD domain containing 3                                | 4.1   | 197358 |
| <i>NLRC4</i>    | NLR family, CARD domain containing 4                                | 4.7   | 58484  |
| <i>NNMT</i>     | nicotinamide N-methyltransferase                                    | -4.9  | 4837   |
| <i>NNT</i>      | nicotinamide nucleotide transhydrogenase                            | -3.3  | 23530  |
| <i>NPC2</i>     | Niemann-Pick disease, type C2                                       | 3.7   | 10577  |
| <i>NPL</i>      | N-acetylneuraminatase pyruvate lyase (dihydrodipicolinate synthase) | 4.8   | 80896  |
| <i>NPNT</i>     | nephronectin                                                        | 3.6   | 255743 |
| <i>NQO1</i>     | NAD(P)H dehydrogenase, quinone 1                                    | 8.4   | 1728   |
| <i>NR0B2</i>    | nuclear receptor subfamily 0, group B, member 2                     | -3.4  | 8431   |
| <i>NR1I2</i>    | nuclear receptor subfamily 1, group I, member 2                     | -5.6  | 8856   |
| <i>NR1I3</i>    | nuclear receptor subfamily 1, group I, member 3                     | -7.5  | 9970   |
| <i>NR5A2</i>    | nuclear receptor subfamily 5, group A, member 2                     | -5.5  | 2494   |
| <i>NRTN</i>     | neurturin                                                           | -4.3  | 4902   |
| <i>NSUN6</i>    | NOP2/Sun domain family, member 6                                    | -4.5  | 221078 |
| <i>NT5DC2</i>   | 5'-nucleotidase domain containing 2                                 | 3.6   | 64943  |
| <i>NUDT7</i>    | nudix (nucleoside diphosphate linked moiety X)-type motif 7         | -4.2  | 283927 |
| <i>ODZ1</i>     | odz, odd Oz/ten-m homolog 1 (Drosophila)                            | -15.7 | 10178  |
| <i>OGDHL</i>    | oxoglutarate dehydrogenase-like                                     | -6.2  | 55753  |
| <i>ORAI2</i>    | ORAI calcium release-activated calcium modulator 2                  | 3.3   | 80228  |
| <i>ORM1</i>     | orosomucoid 1                                                       | -53.0 | 5004   |
| <i>OSBPL3</i>   | oxysterol binding protein-like 3                                    | 6.2   | 26031  |
| <i>OSBPL8</i>   | oxysterol binding protein-like 8                                    | 3.5   | 114882 |
| <i>OSTalpha</i> | organic solute transporter alpha                                    | -3.9  | 200931 |
| <i>OTC</i>      | ornithine carbamoyltransferase                                      | -4.5  | 5009   |
| <i>P2RX5</i>    | purinergic receptor P2X, ligand-gated ion channel, 5                | 4.9   | 5026   |
| <i>P2RY12</i>   | purinergic receptor P2Y, G-protein coupled, 12                      | 7.9   | 64805  |
| <i>P2RY13</i>   | purinergic receptor P2Y, G-protein coupled, 13                      | 3.6   | 53829  |
| <i>P2RY8</i>    | purinergic receptor P2Y, G-protein coupled, 8                       | 5.1   | 286530 |
| <i>PAH</i>      | phenylalanine hydroxylase                                           | -4.4  | 5053   |
| <i>PAIP2B</i>   | poly(A) binding protein interacting protein 2B                      | -3.7  | 400961 |
| <i>PALLD</i>    | palladin, cytoskeletal associated protein                           | 3.0   | 23022  |
| <i>PALM2</i>    | paralemmin 2                                                        | -10.1 | 114299 |
| <i>PAMR1</i>    | peptidase domain containing associated with muscle regeneration 1   | 3.3   | 25891  |
| <i>PANK1</i>    | pantothenate kinase 1                                               | -7.8  | 53354  |
| <i>PAPLN</i>    | papilin, proteoglycan-like sulfated glycoprotein                    | 6.6   | 89932  |
| <i>PAQR5</i>    | progesterin and adipoQ receptor family member V                     | 4.3   | 54852  |
| <i>PAQR8</i>    | progesterin and adipoQ receptor family member VIII                  | 3.0   | 85315  |
| <i>PAQR9</i>    | progesterin and adipoQ receptor family member IX                    | -10.7 | 344838 |
| <i>PAX5</i>     | paired box 5                                                        | 3.2   | 5079   |
| <i>PBLD</i>     | phenazine biosynthesis-like protein domain containing               | -6.0  | 64081  |
| <i>PC</i>       | pyruvate carboxylase                                                | -9.0  | 5091   |
| <i>PCCB</i>     | propionyl CoA carboxylase, beta polypeptide                         | -3.2  | 5096   |
| <i>PCK1</i>     | phosphoenolpyruvate carboxykinase 1 (soluble)                       | -9.6  | 5105   |
| <i>PCOLCE2</i>  | procollagen C-endopeptidase enhancer 2                              | -10.5 | 26577  |
| <i>PCSK6</i>    | proprotein convertase subtilisin/kexin type 6                       | -14.4 | 5046   |
| <i>PCSK9</i>    | proprotein convertase subtilisin/kexin type 9                       | -5.0  | 255738 |
| <i>PCYOX1L</i>  | prenylcysteine oxidase 1 like                                       | 3.1   | 78991  |
| <i>PDE11A</i>   | phosphodiesterase 11A                                               | -5.4  | 50940  |
| <i>PDE1A</i>    | phosphodiesterase 1A, calmodulin-dependent                          | 3.3   | 5136   |
| <i>PDE4A</i>    | phosphodiesterase 4A, cAMP-specific                                 | 3.1   | 5141   |

|                  |                                                                                  |       |        |
|------------------|----------------------------------------------------------------------------------|-------|--------|
| <b>PDI A5</b>    | protein disulfide isomerase family A, member 5                                   | -3.2  | 10954  |
| <b>PDZK1IP1</b>  | PDZK1 interacting protein 1                                                      | 3.8   | 10158  |
| <b>PECAM1</b>    | platelet/endothelial cell adhesion molecule                                      | 4.0   | 5175   |
| <b>PER2</b>      | period homolog 2 (Drosophila)                                                    | -3.1  | 8864   |
| <b>PEX13</b>     | peroxisomal biogenesis factor 13                                                 | -3.5  | 5194   |
| <b>PFKFB1</b>    | 6-phosphofructo-2-kinase/fructose-2,6-biphosphatase 1                            | -3.9  | 5207   |
| <b>PFKFB3</b>    | 6-phosphofructo-2-kinase/fructose-2,6-biphosphatase 3                            | 3.4   | 5209   |
| <b>PFKP</b>      | phosphofructokinase, platelet                                                    | 5.0   | 5214   |
| <b>PGLYRP2</b>   | peptidoglycan recognition protein 2                                              | -12.3 | 114770 |
| <b>PGM1</b>      | phosphoglucomutase 1                                                             | -4.7  | 5236   |
| <b>PGRMC1</b>    | progesterone receptor membrane component 1                                       | -5.4  | 10857  |
| <b>PHYH</b>      | phytanoyl-CoA 2-hydroxylase                                                      | -3.6  | 5264   |
| <b>PID1</b>      | phosphotyrosine interaction domain containing 1                                  | -7.1  | 55022  |
| <b>PIK3C2G</b>   | phosphoinositide-3-kinase, class 2, gamma polypeptide                            | -4.4  | 5288   |
| <b>PIK3CD</b>    | phosphoinositide-3-kinase, catalytic, delta polypeptide                          | 3.6   | 5293   |
| <b>PIK3IP1</b>   | phosphoinositide-3-kinase interacting protein 1                                  | 3.2   | 113791 |
| <b>PIK3R5</b>    | phosphoinositide-3-kinase, regulatory subunit 5                                  | 4.7   | 23533  |
| <b>PILRA</b>     | paired immunoglobulin-like type 2 receptor alpha                                 | 3.5   | 29992  |
| <b>PIM2</b>      | pim-2 oncogene                                                                   | 3.6   | 11040  |
| <b>PIPOX</b>     | pipecolic acid oxidase                                                           | -7.3  | 51268  |
| <b>PKIB</b>      | protein kinase (cAMP-dependent, catalytic) inhibitor beta                        | 3.6   | 5570   |
| <b>PKM2</b>      | pyruvate kinase, muscle                                                          | 3.1   | 5315   |
| <b>PKP2</b>      | plakophilin 2                                                                    | -4.7  | 5318   |
| <b>PLA1A</b>     | phospholipase A1 member A                                                        | -3.3  | 51365  |
| <b>PLA2G12B</b>  | phospholipase A2, group XIIB                                                     | -4.8  | 84647  |
| <b>PLA2G7</b>    | phospholipase A2, group VII (platelet-activating factor acetylhydrolase, plasma) | 13.6  | 7941   |
| <b>PLAT</b>      | plasminogen activator, tissue                                                    | 3.3   | 5327   |
| <b>PLD3</b>      | phospholipase D family, member 3                                                 | 3.0   | 23646  |
| <b>PLG</b>       | plasminogen                                                                      | -16.9 | 5340   |
| <b>PLGLB2</b>    | plasminogen-like B2                                                              | -10.1 | 5342   |
| <b>PLIN5</b>     | perilipin 5                                                                      | -3.2  | 440503 |
| <b>PLP2</b>      | proteolipid protein 2 (colonic epithelium-enriched)                              | 3.4   | 5355   |
| <b>PLSCR4</b>    | phospholipid scramblase 4                                                        | -3.1  | 57088  |
| <b>PLTP</b>      | phospholipid transfer protein                                                    | 8.7   | 5360   |
| <b>PLXDC2</b>    | plexin domain containing 2                                                       | 3.6   | 84898  |
| <b>PLXNA1</b>    | plexin A1                                                                        | 3.7   | 5361   |
| <b>PLXNC1</b>    | plexin C1                                                                        | 4.9   | 10154  |
| <b>PMEPA1</b>    | prostate transmembrane protein, androgen induced 1                               | 5.1   | 56937  |
| <b>PMP22</b>     | peripheral myelin protein 22                                                     | 3.0   | 5376   |
| <b>PNOC</b>      | prepronociceptin                                                                 | 4.9   | 5368   |
| <b>PNPLA3</b>    | patatin-like phospholipase domain containing 3                                   | -6.8  | 80339  |
| <b>POM121L9P</b> | POM121 membrane glycoprotein-like 9, pseudogene                                  | 5.7   | 29774  |
| <b>PONI</b>      | paraoxonase 1                                                                    | -17.1 | 5444   |
| <b>PON3</b>      | paraoxonase 3                                                                    | -17.0 | 5446   |
| <b>POU2AF1</b>   | POU class 2 associating factor 1                                                 | 31.8  | 5450   |
| <b>PPAP2C</b>    | phosphatidic acid phosphatase type 2C                                            | 3.2   | 8612   |
| <b>PPID</b>      | peptidylprolyl isomerase D                                                       | -4.4  | 5481   |
| <b>PPP1R14A</b>  | protein phosphatase 1, regulatory (inhibitor) subunit 14A                        | 4.2   | 94274  |
| <b>PPP1R1A</b>   | protein phosphatase 1, regulatory (inhibitor) subunit 1A                         | -9.4  | 5502   |
| <b>PPP1R3B</b>   | protein phosphatase 1, regulatory (inhibitor) subunit 3B                         | -3.2  | 79660  |
| <b>PPP1R3C</b>   | protein phosphatase 1, regulatory (inhibitor) subunit 3C                         | -7.8  | 5507   |
| <b>PPP2R1B</b>   | protein phosphatase 2, regulatory subunit A, beta                                | -7.3  | 5519   |
| <b>PPT1</b>      | palmitoyl-protein thioesterase 1                                                 | 3.6   | 5538   |
| <b>PRC1</b>      | protein regulator of cytokinesis 1                                               | 5.1   | 9055   |
| <b>PRDM1</b>     | PR domain containing 1, with ZNF domain                                          | 6.5   | 639    |

|                 |                                                                                         |       |        |
|-----------------|-----------------------------------------------------------------------------------------|-------|--------|
| <b>PRDX3</b>    | peroxiredoxin 3                                                                         | -3.3  | 10935  |
| <b>PRELP</b>    | proline/arginine-rich end leucine-rich repeat protein                                   | 3.1   | 5549   |
| <b>PRF1</b>     | perforin 1 (pore forming protein)                                                       | 5.6   | 5551   |
| <b>PRG4</b>     | proteoglycan 4                                                                          | -11.9 | 10216  |
| <b>PRKCB</b>    | protein kinase C, beta                                                                  | 3.8   | 5579   |
| <b>PRKX</b>     | protein kinase, X-linked                                                                | 3.8   | 5613   |
| <b>PROC</b>     | protein C (inactivator of coagulation factors Va and VIIIa)                             | -6.7  | 5624   |
| <b>PROCR</b>    | protein C receptor, endothelial                                                         | 4.7   | 10544  |
| <b>PROM1</b>    | prominin 1                                                                              | 5.2   | 8842   |
| <b>PROX1</b>    | prospero homeobox 1                                                                     | -3.6  | 5629   |
| <b>PROZ</b>     | protein Z, vitamin K-dependent plasma glycoprotein                                      | -4.0  | 8858   |
| <b>PRR11</b>    | proline rich 11                                                                         | 7.1   | 55771  |
| <b>PRRG4</b>    | proline rich Gla (G-carboxyglutamic acid) 4 (transmembrane)                             | -5.0  | 79056  |
| <b>PRSS23</b>   | protease, serine, 23                                                                    | 4.4   | 11098  |
| <b>PSAT1</b>    | phosphoserine aminotransferase 1                                                        | -4.0  | 29968  |
| <b>PTAFR</b>    | platelet-activating factor receptor                                                     | 3.4   | 5724   |
| <b>PTGDR</b>    | prostaglandin D2 receptor (DP)                                                          | 4.6   | 5729   |
| <b>PTGDS</b>    | prostaglandin D2 synthase 21kDa (brain)                                                 | 3.0   | 5730   |
| <b>PTGIS</b>    | prostaglandin I2 (prostacyclin) synthase                                                | 3.5   | 5740   |
| <b>PTGR1</b>    | prostaglandin reductase 1                                                               | -3.1  | 22949  |
| <b>PTP4A1</b>   | protein tyrosine phosphatase type IVA, member 1                                         | -4.3  | 7803   |
| <b>PTPLAD2</b>  | protein tyrosine phosphatase-like A domain containing 2                                 | 3.5   | 401494 |
| <b>PTPN22</b>   | protein tyrosine phosphatase, non-receptor type 22 (lymphoid)                           | 3.6   | 26191  |
| <b>PTPN3</b>    | protein tyrosine phosphatase, non-receptor type 3                                       | -6.0  | 5774   |
| <b>PTPRC</b>    | protein tyrosine phosphatase, receptor type, C                                          | 4.2   | 5788   |
| <b>PTPRF</b>    | protein tyrosine phosphatase, receptor type, F                                          | -4.8  | 5792   |
| <b>PTTG1</b>    | pituitary tumor-transforming 1                                                          | 3.7   | 9232   |
| <b>PVRIG</b>    | poliovirus receptor related immunoglobulin domain containing                            | 3.6   | 79037  |
| <b>PVRL3</b>    | poliovirus receptor-related 3                                                           | -5.1  | 25945  |
| <b>PXMP2</b>    | peroxisomal membrane protein 2, 22kDa                                                   | -5.1  | 5827   |
| <b>PYCARD</b>   | PYD and CARD domain containing                                                          | 4.1   | 29108  |
| <b>PYHIN1</b>   | pyrin and HIN domain family, member 1                                                   | 5.3   | 149628 |
| <b>PZP</b>      | pregnancy-zone protein                                                                  | -11.1 | 5858   |
| <b>RAB14</b>    | RAB14, member RAS oncogene family                                                       | -3.0  | 51552  |
| <b>RAB17</b>    | RAB17, member RAS oncogene family                                                       | -3.9  | 64284  |
| <b>RAB25</b>    | RAB25, member RAS oncogene family                                                       | 4.1   | 57111  |
| <b>RAB27A</b>   | RAB27A, member RAS oncogene family                                                      | -3.8  | 5873   |
| <b>RAB31</b>    | RAB31, member RAS oncogene family                                                       | 4.8   | 11031  |
| <b>RAB34</b>    | RAB34, member RAS oncogene family                                                       | 3.9   | 83871  |
| <b>RAB7B</b>    | RAB7B, member RAS oncogene family                                                       | 3.5   | 338382 |
| <b>RABGAPIL</b> | RAB GTPase activating protein 1-like                                                    | 3.6   | 9910   |
| <b>RAC2</b>     | ras-related C3 botulinum toxin substrate 2 (rho family, small GTP binding protein Rac2) | 4.8   | 5880   |
| <b>RACGAP1</b>  | Rac GTPase activating protein 1                                                         | 5.8   | 29127  |
| <b>RAPGEF4</b>  | Rap guanine nucleotide exchange factor (GEF) 4                                          | -3.5  | 11069  |
| <b>RARRES2</b>  | retinoic acid receptor responder (tazarotene induced) 2                                 | -3.8  | 5919   |
| <b>RASEF</b>    | RAS and EF-hand domain containing                                                       | 5.3   | 158158 |
| <b>RASGRP1</b>  | RAS guanyl releasing protein 1 (calcium and DAG-regulated)                              | 7.1   | 10125  |
| <b>RASSF2</b>   | Ras association (RalGDS/AF-6) domain family member 2                                    | 3.1   | 9770   |
| <b>RASSF4</b>   | Ras association (RalGDS/AF-6) domain family member 4                                    | 3.4   | 83937  |
| <b>RBMS2</b>    | RNA binding motif, single stranded interacting protein 2                                | 3.1   | 5939   |
| <b>RBP1</b>     | retinol binding protein 1, cellular                                                     | 3.8   | 5947   |
| <b>RBP4</b>     | retinol binding protein 4, plasma                                                       | -5.5  | 5950   |
| <b>RBP7</b>     | retinol binding protein 7, cellular                                                     | 3.7   | 116362 |
| <b>RCL1</b>     | RNA terminal phosphate cyclase-like 1                                                   | -3.4  | 10171  |
| <b>RCSD1</b>    | RCSD domain containing 1                                                                | 6.0   | 92241  |

|                       |                                                                            |       |        |
|-----------------------|----------------------------------------------------------------------------|-------|--------|
| <b><i>RDH10</i></b>   | retinol dehydrogenase 10 (all-trans)                                       | -3.5  | 157506 |
| <b><i>RDH11</i></b>   | retinol dehydrogenase 11 (all-trans/9-cis/11-cis)                          | -3.4  | 51109  |
| <b><i>RDH16</i></b>   | retinol dehydrogenase 16 (all-trans)                                       | -14.7 | 8608   |
| <b><i>REEP6</i></b>   | receptor accessory protein 6                                               | -4.8  | 92840  |
| <b><i>REPS2</i></b>   | RALBP1 associated Eps domain containing 2                                  | -3.3  | 9185   |
| <b><i>RGL1</i></b>    | ral guanine nucleotide dissociation stimulator-like 1                      | 3.5   | 23179  |
| <b><i>RGN</i></b>     | regucalcin (senescence marker protein-30)                                  | -7.3  | 9104   |
| <b><i>RGS10</i></b>   | regulator of G-protein signaling 10                                        | 5.7   | 6001   |
| <b><i>RHOBTB1</i></b> | Rho-related BTB domain containing 1                                        | 5.3   | 9886   |
| <b><i>RNASE1</i></b>  | ribonuclease, RNase A family, 1 (pancreatic)                               | 10.6  | 6035   |
| <b><i>RNASE2</i></b>  | ribonuclease, RNase A family, 2 (liver, eosinophil-derived neurotoxin)     | 5.0   | 6036   |
| <b><i>RNASE4</i></b>  | ribonuclease, RNase A family, 4                                            | -9.3  | 6038   |
| <b><i>RNASE6</i></b>  | ribonuclease, RNase A family, k6                                           | 12.6  | 6039   |
| <b><i>RNASET2</i></b> | ribonuclease T2                                                            | 4.5   | 8635   |
| <b><i>RND1</i></b>    | Rho family GTPase 1                                                        | -5.5  | 27289  |
| <b><i>RNF128</i></b>  | ring finger protein 128                                                    | -3.2  | 79589  |
| <b><i>RNF135</i></b>  | ring finger protein 135                                                    | 4.3   | 84282  |
| <b><i>RNF165</i></b>  | ring finger protein 165                                                    | -3.5  | 494470 |
| <b><i>RNFT1</i></b>   | ring finger protein, transmembrane 1                                       | -3.1  | 51136  |
| <b><i>RORC</i></b>    | RAR-related orphan receptor C                                              | -5.7  | 6097   |
| <b><i>RRM2</i></b>    | ribonucleotide reductase M2                                                | 7.1   | 6241   |
| <b><i>RTP3</i></b>    | receptor (chemosensory) transporter protein 3                              | -3.3  | 83597  |
| <b><i>RUNDC3B</i></b> | RUN domain containing 3B                                                   | -7.6  | 154661 |
| <b><i>RUNX1</i></b>   | runt-related transcription factor 1                                        | 3.3   | 861    |
| <b><i>RUNX2</i></b>   | runt-related transcription factor 2                                        | 4.9   | 860    |
| <b><i>RUNX3</i></b>   | runt-related transcription factor 3                                        | 5.0   | 864    |
| <b><i>RWDD2B</i></b>  | RWD domain containing 2B                                                   | -4.0  | 10069  |
| <b><i>S100A11</i></b> | S100 calcium binding protein A11                                           | 10.3  | 6282   |
| <b><i>S100A12</i></b> | S100 calcium binding protein A12                                           | 3.8   | 6283   |
| <b><i>S100A4</i></b>  | S100 calcium binding protein A4                                            | 5.4   | 6275   |
| <b><i>S100A6</i></b>  | S100 calcium binding protein A6                                            | 8.1   | 6277   |
| <b><i>S100A9</i></b>  | S100 calcium binding protein A9                                            | 3.6   | 6280   |
| <b><i>SAA4</i></b>    | serum amyloid A4, constitutive                                             | -20.7 | 6291   |
| <b><i>SALL1</i></b>   | sal-like 1 (Drosophila)                                                    | -7.6  | 6299   |
| <b><i>SAMD3</i></b>   | sterile alpha motif domain containing 3                                    | 3.9   | 154075 |
| <b><i>SAMD9</i></b>   | sterile alpha motif domain containing 9                                    | 3.1   | 54809  |
| <b><i>SAMD9L</i></b>  | sterile alpha motif domain containing 9-like                               | 4.0   | 219285 |
| <b><i>SAMHD1</i></b>  | SAM domain and HD domain 1                                                 | 3.7   | 25939  |
| <b><i>SAMSN1</i></b>  | SAM domain, SH3 domain and nuclear localization signals 1                  | 3.1   | 64092  |
| <b><i>SASH3</i></b>   | SAM and SH3 domain containing 3                                            | 4.0   | 54440  |
| <b><i>SC5DL</i></b>   | sterol-C5-desaturase (ERG3 delta-5-desaturase homolog, S. cerevisiae)-like | -5.2  | 6309   |
| <b><i>SCD</i></b>     | stearoyl-CoA desaturase (delta-9-desaturase)                               | -4.2  | 6319   |
| <b><i>SCD5</i></b>    | stearoyl-CoA desaturase 5                                                  | 4.4   | 79966  |
| <b><i>SCPEP1</i></b>  | serine carboxypeptidase 1                                                  | 3.3   | 59342  |
| <b><i>SCRNI</i></b>   | secernin 1                                                                 | 3.8   | 9805   |
| <b><i>SDC2</i></b>    | syndecan 2                                                                 | -5.7  | 6383   |
| <b><i>SDC3</i></b>    | syndecan 3                                                                 | 4.9   | 9672   |
| <b><i>SEC14L1</i></b> | SEC14-like 1 (S. cerevisiae)                                               | 3.4   | 6397   |
| <b><i>SEC16B</i></b>  | SEC16 homolog B (S. cerevisiae)                                            | -3.3  | 89866  |
| <b><i>SEL1L</i></b>   | sel-1 suppressor of lin-12-like (C. elegans)                               | -3.5  | 6400   |
| <b><i>SEL1L3</i></b>  | sel-1 suppressor of lin-12-like 3 (C. elegans)                             | 5.9   | 23231  |
| <b><i>SELM</i></b>    | selenoprotein M                                                            | 4.5   | 140606 |
| <b><i>SELPLG</i></b>  | selectin P ligand                                                          | 6.2   | 6404   |
| <b><i>SEMA4D</i></b>  | sema domain, immunoglobulin domain (Ig), transmembrane domain              |       | 10507  |

|                  |                                                                                                         |       |        |
|------------------|---------------------------------------------------------------------------------------------------------|-------|--------|
|                  | (TM) and short cytoplasmic domain, (semaphorin) 4D                                                      | 3.1   |        |
| <b>SEPP1</b>     | selenoprotein P, plasma, 1                                                                              | -3.2  | 6414   |
| <b>SERINC5</b>   | serine incorporator 5                                                                                   | -3.9  | 256987 |
| <b>SERPINA1</b>  | serpin peptidase inhibitor, clade A (alpha-1 antiproteinase, antitrypsin), member 1                     | -5.5  | 5265   |
| <b>SERPINA10</b> | serpin peptidase inhibitor, clade A (alpha-1 antiproteinase, antitrypsin), member 10                    | -34.6 | 51156  |
| <b>SERPINA3</b>  | serpin peptidase inhibitor, clade A (alpha-1 antiproteinase, antitrypsin), member 3                     | -3.7  | 12     |
| <b>SERPINA4</b>  | serpin peptidase inhibitor, clade A (alpha-1 antiproteinase, antitrypsin), member 4                     | -3.0  | 5267   |
| <b>SERPINA5</b>  | serpin peptidase inhibitor, clade A (alpha-1 antiproteinase, antitrypsin), member 5                     | -3.1  | 5104   |
| <b>SERPINA6</b>  | serpin peptidase inhibitor, clade A (alpha-1 antiproteinase, antitrypsin), member 6                     | -6.4  | 866    |
| <b>SERPINA7</b>  | serpin peptidase inhibitor, clade A (alpha-1 antiproteinase, antitrypsin), member 7                     | -25.2 | 6906   |
| <b>SERPINC1</b>  | serpin peptidase inhibitor, clade C (antithrombin), member 1                                            | -28.4 | 462    |
| <b>SERPIND1</b>  | serpin peptidase inhibitor, clade D (heparin cofactor), member 1                                        | -27.1 | 3053   |
| <b>SERPINE2</b>  | serpin peptidase inhibitor, clade E (nexin, plasminogen activator inhibitor type 1), member 2           | 4.7   | 5270   |
| <b>SERPINF1</b>  | serpin peptidase inhibitor, clade F (alpha-2 antiplasmin, pigment epithelium derived factor), member 1  | -4.5  | 5176   |
| <b>SERPINF2</b>  | serpin peptidase inhibitor, clade F (alpha-2 antiplasmin, pigment epithelium derived factor), member 2  | -10.0 | 5345   |
| <b>SFN</b>       | stratifin                                                                                               | 6.4   | 2810   |
| <b>SGK2</b>      | serum/glucocorticoid regulated kinase 2                                                                 | -3.9  | 10110  |
| <b>SGK223</b>    | homolog of rat pragma of Rnd2                                                                           | 4.2   | 157285 |
| <b>SGPP2</b>     | sphingosine-1-phosphate phosphatase 2                                                                   | 5.1   | 130367 |
| <b>SH2D1A</b>    | SH2 domain containing 1A                                                                                | 3.4   | 4068   |
| <b>SH3BGR13</b>  | SH3 domain binding glutamic acid-rich protein like 3                                                    | 4.3   | 83442  |
| <b>SHMT1</b>     | serine hydroxymethyltransferase 1 (soluble)                                                             | -5.4  | 6470   |
| <b>SIDT1</b>     | SID1 transmembrane family, member 1                                                                     | 3.1   | 54847  |
| <b>SIGLEC1</b>   | sialic acid binding Ig-like lectin 1, sialoadhesin                                                      | 5.8   | 6614   |
| <b>SIGLEC10</b>  | sialic acid binding Ig-like lectin 10                                                                   | 4.5   | 89790  |
| <b>SIGLEC11</b>  | sialic acid binding Ig-like lectin 11                                                                   | 3.5   | 114132 |
| <b>SIGLEC7</b>   | sialic acid binding Ig-like lectin 7                                                                    | 4.7   | 27036  |
| <b>SLA</b>       | Src-like-adaptor                                                                                        | 4.9   | 6503   |
| <b>SLAMF7</b>    | SLAM family member 7                                                                                    | 9.3   | 57823  |
| <b>SLAMF8</b>    | SLAM family member 8                                                                                    | 5.4   | 56833  |
| <b>SLC10A1</b>   | solute carrier family 10 (sodium/bile acid cotransporter family), member 1                              | -8.5  | 6554   |
| <b>SLC12A2</b>   | solute carrier family 12 (sodium/potassium/chloride transporters), member 2                             | 4.6   | 6558   |
| <b>SLC13A5</b>   | solute carrier family 13 (sodium-dependent citrate transporter), member 5                               | -41.7 | 284111 |
| <b>SLC16A10</b>  | solute carrier family 16, member 10 (aromatic amino acid transporter)                                   | -4.3  | 117247 |
| <b>SLC16A2</b>   | solute carrier family 16, member 2 (monocarboxylic acid transporter 8)                                  | -4.0  | 6567   |
| <b>SLC17A2</b>   | solute carrier family 17 (sodium phosphate), member 2                                                   | -30.8 | 10246  |
| <b>SLC19A3</b>   | solute carrier family 19, member 3                                                                      | -4.7  | 80704  |
| <b>SLC1A1</b>    | solute carrier family 1 (neuronal/epithelial high affinity glutamate transporter, system Xag), member 1 | -6.6  | 6505   |
| <b>SLC1A2</b>    | solute carrier family 1 (glial high affinity glutamate transporter), member 2                           | -3.7  | 6506   |

|                 |                                                                                                             |       |        |
|-----------------|-------------------------------------------------------------------------------------------------------------|-------|--------|
| <i>SLC1A3</i>   | solute carrier family 1 (glial high affinity glutamate transporter), member 3                               | 3.2   | 6507   |
| <i>SLC22A1</i>  | solute carrier family 22 (organic cation transporter), member 1                                             | -20.6 | 6580   |
| <i>SLC22A25</i> | solute carrier family 22, member 25                                                                         | -5.1  | 387601 |
| <i>SLC22A3</i>  | solute carrier family 22 (extraneuronal monoamine transporter), member 3                                    | -7.2  | 6581   |
| <i>SLC22A7</i>  | solute carrier family 22 (organic anion transporter), member 7                                              | -6.0  | 10864  |
| <i>SLC22A9</i>  | solute carrier family 22 (organic anion transporter), member 9                                              | -3.3  | 114571 |
| <i>SLC25A13</i> | solute carrier family 25, member 13 (citrin)                                                                | -3.0  | 10165  |
| <i>SLC25A16</i> | solute carrier family 25 (mitochondrial carrier; Graves disease autoantigen), member 16                     | -3.6  | 8034   |
| <i>SLC25A18</i> | solute carrier family 25 (mitochondrial carrier), member 18                                                 | -7.1  | 83733  |
| <i>SLC25A36</i> | solute carrier family 25, member 36                                                                         | 3.9   | 55186  |
| <i>SLC25A47</i> | solute carrier family 25, member 47                                                                         | -4.0  | 283600 |
| <i>SLC27A2</i>  | solute carrier family 27 (fatty acid transporter), member 2                                                 | -19.7 | 11001  |
| <i>SLC27A5</i>  | solute carrier family 27 (fatty acid transporter), member 5                                                 | -11.1 | 10998  |
| <i>SLC28A1</i>  | solute carrier family 28 (sodium-coupled nucleoside transporter), member 1                                  | -3.4  | 9154   |
| <i>SLC2A10</i>  | solute carrier family 2 (facilitated glucose transporter), member 10                                        | -7.3  | 81031  |
| <i>SLC2A2</i>   | solute carrier family 2 (facilitated glucose transporter), member 2                                         | -11.9 | 6514   |
| <i>SLC2A5</i>   | solute carrier family 2 (facilitated glucose/fructose transporter), member 5                                | 4.6   | 6518   |
| <i>SLC30A1</i>  | solute carrier family 30 (zinc transporter), member 1                                                       | -5.8  | 7779   |
| <i>SLC30A10</i> | solute carrier family 30, member 10                                                                         | -6.4  | 55532  |
| <i>SLC31A1</i>  | solute carrier family 31 (copper transporters), member 1                                                    | -3.4  | 1317   |
| <i>SLC35D1</i>  | solute carrier family 35 (UDP-glucuronic acid/UDP-N-acetylgalactosamine dual transporter), member D1        | -3.7  | 23169  |
| <i>SLC38A3</i>  | solute carrier family 38, member 3                                                                          | -3.3  | 10991  |
| <i>SLC38A4</i>  | solute carrier family 38, member 4                                                                          | -15.3 | 55089  |
| <i>SLC39A14</i> | solute carrier family 39 (zinc transporter), member 14                                                      | -5.5  | 23516  |
| <i>SLC41A2</i>  | solute carrier family 41, member 2                                                                          | -6.0  | 84102  |
| <i>SLC44A1</i>  | solute carrier family 44, member 1                                                                          | -3.7  | 23446  |
| <i>SLC44A2</i>  | solute carrier family 44, member 2                                                                          | 3.0   | 57153  |
| <i>SLC47A1</i>  | solute carrier family 47, member 1                                                                          | -5.8  | 55244  |
| <i>SLC6A1</i>   | solute carrier family 6 (neurotransmitter transporter, GABA), member 1                                      | -23.3 | 6529   |
| <i>SLC6A12</i>  | solute carrier family 6 (neurotransmitter transporter, betaine/GABA), member 12                             | -3.6  | 6539   |
| <i>SLC6A6</i>   | solute carrier family 6 (neurotransmitter transporter, taurine), member 6                                   | 3.5   | 6533   |
| <i>SLC7A11</i>  | solute carrier family 7 (anionic amino acid transporter light chain, xc- system), member 11                 | 4.3   | 23657  |
| <i>SLC7A2</i>   | solute carrier family 7 (cationic amino acid transporter, y+ system), member 2                              | -4.4  | 6542   |
| <i>SLC7A7</i>   | solute carrier family 7 (amino acid transporter light chain, y+L system), member 7                          | 5.1   | 9056   |
| <i>SLC7A9</i>   | solute carrier family 7 (glycoprotein-associated amino acid transporter light chain, bo,+ system), member 9 | -4.8  | 11136  |
| <i>SLC8A1</i>   | solute carrier family 8 (sodium/calcium exchanger), member 1                                                | 6.3   | 6546   |
| <i>SLC9B2</i>   | solute carrier family 9, subfamily B (cation proton antiporter 2), member 2                                 | -5.5  | 133308 |
| <i>SLCO1B1</i>  | solute carrier organic anion transporter family, member 1B1                                                 | -20.9 | 10599  |
| <i>SLCO1B3</i>  | solute carrier organic anion transporter family, member 1B3                                                 | -24.4 | 28234  |
| <i>SLCO4C1</i>  | solute carrier organic anion transporter family, member 4C1                                                 | -14.3 | 353189 |
| <i>SLFN12</i>   | schlafen family member 12                                                                                   | 3.2   | 55106  |
| <i>SMEK2</i>    | SMEK homolog 2, suppressor of mek1 (Dictyostelium)                                                          | -3.0  | 57223  |

|                 |                                                                                                      |       |        |
|-----------------|------------------------------------------------------------------------------------------------------|-------|--------|
| <b>SMOC1</b>    | SPARC related modular calcium binding 1                                                              | -3.2  | 64093  |
| <b>SNX20</b>    | sorting nexin 20                                                                                     | 4.3   | 124460 |
| <b>SOCS6</b>    | suppressor of cytokine signaling 6                                                                   | -3.2  | 9306   |
| <b>SORD</b>     | sorbitol dehydrogenase                                                                               | -3.9  | 6652   |
| <b>SOX4</b>     | SRY (sex determining region Y)-box 4                                                                 | 4.3   | 6659   |
| <b>SOX9</b>     | SRY (sex determining region Y)-box 9                                                                 | 3.7   | 6662   |
| <b>SP140</b>    | SP140 nuclear body protein                                                                           | 4.4   | 11262  |
| <b>SPATS2</b>   | spermatogenesis associated, serine-rich 2                                                            | 3.5   | 65244  |
| <b>SPINT1</b>   | serine peptidase inhibitor, Kunitz type 1                                                            | 3.1   | 6692   |
| <b>SPINT2</b>   | serine peptidase inhibitor, Kunitz type, 2                                                           | 4.9   | 10653  |
| <b>SPOCK2</b>   | sparc/osteonectin, cwcv and kazal-like domains proteoglycan (testican) 2                             | 3.5   | 9806   |
| <b>SPP1</b>     | secreted phosphoprotein 1                                                                            | 10.2  | 6696   |
| <b>SPP2</b>     | secreted phosphoprotein 2, 24kDa                                                                     | -14.2 | 6694   |
| <b>SPRYD4</b>   | SPRY domain containing 4                                                                             | -3.0  | 283377 |
| <b>SRD5A1</b>   | steroid-5-alpha-reductase, alpha polypeptide 1 (3-oxo-5 alpha-steroid delta 4-dehydrogenase alpha 1) | -3.5  | 6715   |
| <b>SRD5A2</b>   | steroid-5-alpha-reductase, alpha polypeptide 2 (3-oxo-5 alpha-steroid delta 4-dehydrogenase alpha 2) | -7.0  | 6716   |
| <b>SRPX2</b>    | sushi-repeat containing protein, X-linked 2                                                          | 6.0   | 27286  |
| <b>SSTR1</b>    | somatostatin receptor 1                                                                              | -5.8  | 6751   |
| <b>ST3GAL6</b>  | ST3 beta-galactoside alpha-2,3-sialyltransferase 6                                                   | -9.5  | 10402  |
| <b>ST6GAL1</b>  | ST6 beta-galactosamide alpha-2,6-sialyltransferase 1                                                 | -4.5  | 6480   |
| <b>ST6GAL2</b>  | ST6 beta-galactosamide alpha-2,6-sialyltransferase 2                                                 | 3.9   | 84620  |
| <b>ST8SIA4</b>  | ST8 alpha-N-acetyl-neuraminide alpha-2,8-sialyltransferase 4                                         | 4.1   | 7903   |
| <b>STARD4</b>   | StAR-related lipid transfer (START) domain containing 4                                              | -3.9  | 134429 |
| <b>STEAP3</b>   | STEAP family member 3                                                                                | -6.4  | 55240  |
| <b>STK10</b>    | serine/threonine kinase 10                                                                           | 4.5   | 6793   |
| <b>STK39</b>    | serine threonine kinase 39                                                                           | 4.9   | 27347  |
| <b>STRADB</b>   | STE20-related kinase adaptor beta                                                                    | -3.4  | 55437  |
| <b>SUCLG2</b>   | succinate-CoA ligase, GDP-forming, beta subunit                                                      | -3.0  | 8801   |
| <b>SULT2A1</b>  | sulfotransferase family, cytosolic, 2A, dehydroepiandrosterone (DHEA)-preferring, member 1           | -11.2 | 6822   |
| <b>SUSD2</b>    | sushi domain containing 2                                                                            | 8.1   | 56241  |
| <b>SYBU</b>     | syntabulin (syntaxin-interacting)                                                                    | -5.6  | 55638  |
| <b>SYK</b>      | spleen tyrosine kinase                                                                               | 5.5   | 6850   |
| <b>SYNPO2</b>   | synaptopodin 2                                                                                       | 3.2   | 171024 |
| <b>SYT13</b>    | synaptotagmin XIII                                                                                   | 8.2   | 57586  |
| <b>SYT17</b>    | synaptotagmin XVII                                                                                   | -5.8  | 51760  |
| <b>SYTL1</b>    | synaptotagmin-like 1                                                                                 | 3.5   | 84958  |
| <b>SYTL2</b>    | synaptotagmin-like 2                                                                                 | 4.8   | 54843  |
| <b>SYTL3</b>    | synaptotagmin-like 3                                                                                 | 4.4   | 94120  |
| <b>TACSTD2</b>  | tumor-associated calcium signal transducer 2                                                         | 12.4  | 4070   |
| <b>TAGLN</b>    | transgelin                                                                                           | 3.7   | 6876   |
| <b>TAT</b>      | tyrosine aminotransferase                                                                            | -3.0  | 6898   |
| <b>TBC1D10C</b> | TBC1 domain family, member 10C                                                                       | 3.1   | 374403 |
| <b>TBC1D8B</b>  | TBC1 domain family, member 8B (with GRAM domain)                                                     | -3.5  | 54885  |
| <b>TBX15</b>    | T-box 15                                                                                             | -3.9  | 6913   |
| <b>TBXAS1</b>   | thromboxane A synthase 1 (platelet)                                                                  | 3.3   | 6916   |
| <b>TCEA3</b>    | transcription elongation factor A (SII), 3                                                           | -4.3  | 6920   |
| <b>TDO2</b>     | tryptophan 2,3-dioxygenase                                                                           | -4.3  | 6999   |
| <b>TESC</b>     | tescalcin                                                                                            | 5.7   | 54997  |
| <b>TF</b>       | transferrin                                                                                          | -3.4  | 7018   |
| <b>TFB2M</b>    | transcription factor B2, mitochondrial                                                               | -3.1  | 64216  |
| <b>TFEC</b>     | transcription factor EC                                                                              | 3.9   | 22797  |
| <b>TFPI</b>     | tissue factor pathway inhibitor (lipoprotein-associated coagulation                                  | -3.1  | 7035   |

|                 |                                                                                                    |       |        |
|-----------------|----------------------------------------------------------------------------------------------------|-------|--------|
|                 | inhibitor)                                                                                         |       |        |
| <b>TFR2</b>     | transferrin receptor 2                                                                             | -22.8 | 7036   |
| <b>TGFB11I</b>  | transforming growth factor beta 1 induced transcript 1                                             | 4.3   | 7041   |
| <b>THBS1</b>    | thrombospondin 1                                                                                   | 3.3   | 7057   |
| <b>THBS2</b>    | thrombospondin 2                                                                                   | 5.8   | 7058   |
| <b>THRB</b>     | thyroid hormone receptor, beta (erythroblastic leukemia viral (v-erb-a) oncogene homolog 2, avian) | -4.5  | 7068   |
| <b>THRSP</b>    | thyroid hormone responsive                                                                         | -13.7 | 7069   |
| <b>TIGD2</b>    | tigger transposable element derived 2                                                              | -3.3  | 166815 |
| <b>TIMD4</b>    | T-cell immunoglobulin and mucin domain containing 4                                                | 5.2   | 91937  |
| <b>TIMP1</b>    | TIMP metallopeptidase inhibitor 1                                                                  | 6.0   | 7076   |
| <b>TLR4</b>     | toll-like receptor 4                                                                               | 3.4   | 7099   |
| <b>TLR8</b>     | toll-like receptor 8                                                                               | 4.3   | 51311  |
| <b>TM4SF5</b>   | transmembrane 4 L six family member 5                                                              | -4.7  | 9032   |
| <b>TMC4</b>     | transmembrane channel-like 4                                                                       | 3.5   | 147798 |
| <b>TMC8</b>     | transmembrane channel-like 8                                                                       | 3.0   | 147138 |
| <b>TMED3</b>    | transmembrane emp24 protein transport domain containing 3                                          | 3.2   | 23423  |
| <b>TMEM106A</b> | transmembrane protein 106A                                                                         | 3.5   | 113277 |
| <b>TMEM176A</b> | transmembrane protein 176A                                                                         | -3.6  | 55365  |
| <b>TMEM176B</b> | transmembrane protein 176B                                                                         | -4.7  | 28959  |
| <b>TMEM220</b>  | transmembrane protein 220                                                                          | -6.5  | 388335 |
| <b>TMEM38B</b>  | transmembrane protein 38B                                                                          | -3.3  | 55151  |
| <b>TMEM41B</b>  | transmembrane protein 41B                                                                          | -4.1  | 440026 |
| <b>TMEM45A</b>  | transmembrane protein 45A                                                                          | -6.1  | 55076  |
| <b>TMEM97</b>   | transmembrane protein 97                                                                           | -3.2  | 27346  |
| <b>TMSB10</b>   | thymosin beta 10                                                                                   | 6.2   | 9168   |
| <b>TNC</b>      | tenascin C                                                                                         | 4.4   | 3371   |
| <b>TNFRSF17</b> | tumor necrosis factor receptor superfamily, member 17                                              | 13.7  | 608    |
| <b>TNFRSF19</b> | tumor necrosis factor receptor superfamily, member 19                                              | 3.0   | 55504  |
| <b>TNFRSF21</b> | tumor necrosis factor receptor superfamily, member 21                                              | 3.0   | 27242  |
| <b>TNFSF13B</b> | tumor necrosis factor (ligand) superfamily, member 13b                                             | 3.5   | 10673  |
| <b>TNFSF15</b>  | tumor necrosis factor (ligand) superfamily, member 15                                              | 3.2   | 9966   |
| <b>TOB1</b>     | transducer of ERBB2, 1                                                                             | -4.2  | 10140  |
| <b>TOM1L1</b>   | target of myb1 (chicken)-like 1                                                                    | -3.7  | 10040  |
| <b>TOP2A</b>    | topoisomerase (DNA) II alpha 170kDa                                                                | 6.9   | 7153   |
| <b>TPM2</b>     | tropomyosin 2 (beta)                                                                               | 6.2   | 7169   |
| <b>TPM4</b>     | tropomyosin 4                                                                                      | 3.6   | 7171   |
| <b>TPPI</b>     | tripeptidyl peptidase I                                                                            | 3.2   | 1200   |
| <b>TPST1</b>    | tyrosylprotein sulfotransferase 1                                                                  | -6.1  | 8460   |
| <b>TRA2A</b>    | transformer 2 alpha homolog (Drosophila)                                                           | 3.4   | 29896  |
| <b>TRAC</b>     | T cell receptor alpha constant                                                                     | 5.1   | 28755  |
| <b>TRAF3IP3</b> | TRAF3 interacting protein 3                                                                        | 5.0   | 80342  |
| <b>TRAF5</b>    | TNF receptor-associated factor 5                                                                   | 4.8   | 7188   |
| <b>TRIM55</b>   | tripartite motif containing 55                                                                     | -3.6  | 84675  |
| <b>TRNP1</b>    | TMF1-regulated nuclear protein 1                                                                   | 3.8   | 388610 |
| <b>TRPM8</b>    | transient receptor potential cation channel, subfamily M, member 8                                 | -8.8  | 79054  |
| <b>TSLP</b>     | thymic stromal lymphopoietin                                                                       | -3.2  | 85480  |
| <b>TSPAN12</b>  | tetraspanin 12                                                                                     | -5.2  | 23554  |
| <b>TSPAN6</b>   | tetraspanin 6                                                                                      | -3.4  | 7105   |
| <b>TTC36</b>    | tetratricopeptide repeat domain 36                                                                 | -7.2  | 143941 |
| <b>TTC39C</b>   | tetratricopeptide repeat domain 39C                                                                | -4.2  | 125488 |
| <b>TTPA</b>     | tocopherol (alpha) transfer protein                                                                | -3.5  | 7274   |
| <b>TTR</b>      | transthyretin                                                                                      | -6.5  | 7276   |
| <b>TUBE1</b>    | tubulin, epsilon 1                                                                                 | -3.1  | 51175  |
| <b>TYROBP</b>   | TYRO protein tyrosine kinase binding protein                                                       | 6.9   | 7305   |
| <b>UAPI</b>     | UDP-N-acetylglucosamine pyrophosphorylase 1                                                        | -3.3  | 6675   |



|                |                                                       |       |        |
|----------------|-------------------------------------------------------|-------|--------|
| <b>UBASH3B</b> | ubiquitin associated and SH3 domain containing B      | 3.9   | 84959  |
| <b>UCP2</b>    | uncoupling protein 2 (mitochondrial, proton carrier)  | 7.6   | 7351   |
| <b>UGP2</b>    | UDP-glucose pyrophosphorylase 2                       | -4.3  | 7360   |
| <b>UGT2B15</b> | UDP glucuronosyltransferase 2 family, polypeptide B15 | -3.9  | 7366   |
| <b>UGT2B28</b> | UDP glucuronosyltransferase 2 family, polypeptide B28 | -4.9  | 54490  |
| <b>UGT2B4</b>  | UDP glucuronosyltransferase 2 family, polypeptide B4  | -18.8 | 7363   |
| <b>UGT3A1</b>  | UDP glycosyltransferase 3 family, polypeptide A1      | -7.7  | 133688 |
| <b>UPB1</b>    | ureidopropionase, beta                                | -5.4  | 51733  |
| <b>VCAN</b>    | versican                                              | 4.2   | 1462   |
| <b>VGLL3</b>   | vestigial like 3 (Drosophila)                         | 3.4   | 389136 |
| <b>VIM</b>     | vimentin                                              | 4.5   | 7431   |
| <b>VMO1</b>    | vitelline membrane outer layer 1 homolog (chicken)    | 8.6   | 284013 |
| <b>VNN1</b>    | vanin 1                                               | -4.4  | 8876   |
| <b>VNN3</b>    | vanin 3                                               | -9.9  | 55350  |
| <b>VSIG4</b>   | V-set and immunoglobulin domain containing 4          | 10.0  | 11326  |
| <b>VTCN1</b>   | V-set domain containing T cell activation inhibitor 1 | 6.3   | 79679  |
| <b>VTN</b>     | vitronectin                                           | -9.8  | 7448   |
| <b>WDR54</b>   | WD repeat domain 54                                   | 3.0   | 84058  |
| <b>WDR72</b>   | WD repeat domain 72                                   | -5.2  | 256764 |
| <b>WFDC1</b>   | WAP four-disulfide core domain 1                      | 5.2   | 58189  |
| <b>WIPF1</b>   | WAS/WASL interacting protein family, member 1         | 4.4   | 7456   |
| <b>WISP1</b>   | WNT1 inducible signaling pathway protein 1            | 8.4   | 8840   |
| <b>WNK3</b>    | WNK lysine deficient protein kinase 3                 | -4.0  | 65267  |
| <b>WNT3</b>    | wingless-type MMTV integration site family, member 3  | -6.2  | 7473   |
| <b>WSB1</b>    | WD repeat and SOCS box containing 1                   | 3.0   | 26118  |
| <b>XDH</b>     | xanthine dehydrogenase                                | -5.3  | 7498   |
| <b>XYLT1</b>   | xylosyltransferase I                                  | 3.1   | 64131  |
| <b>ZEB2</b>    | zinc finger E-box binding homeobox 2                  | 3.1   | 9839   |
| <b>ZG16</b>    | zymogen granule protein 16 homolog (rat)              | -3.6  | 653808 |
| <b>ZIC1</b>    | Zic family member 1                                   | -5.4  | 7545   |
| <b>ZNF320</b>  | zinc finger protein 320                               | 4.0   | 162967 |
| <b>ZNF385B</b> | zinc finger protein 385B                              | -3.1  | 151126 |
| <b>ZNF83</b>   | zinc finger protein 83                                | 3.4   | 55769  |
| <b>ZNF880</b>  | zinc finger protein 880                               | 3.3   | 400713 |
| <b>ZWINT</b>   | ZW10 interactor                                       | 5.2   | 11130  |

**Table S8.** List of 111 miRNAs differentially expressed in patients with HBV-associated acute liver failure

| <b>miRNA Symbol<br/>(Affymetrix)</b> | <b>miRbase21</b>          | <b>Fold Change</b> |
|--------------------------------------|---------------------------|--------------------|
| hp_hsa-mir-1826_st                   | primary transcript        | 1.7                |
| hp_hsa-mir-194-2_x_st                | primary transcript        | -2.2               |
| hp_hsa-mir-320c-1_st                 | primary transcript        | -2.3               |
| hsa-let-7i_st                        | let-7i-5p                 | 3.5                |
| hsa-miR-106a_st                      | miR-106a-5p               | -1.6               |
| hsa-miR-10a_st                       | miR-10a-5p                | 2.8                |
| hsa-miR-122-star_st                  | miR-122-3p                | -15.2              |
| hsa-miR-1244_st                      | miR-1244                  | 5.7                |
| hsa-miR-125b-2-star_st               | miR-125b-2-3p             | -5.0               |
| hsa-miR-1301_st                      | miR-1301-3p               | 4.2                |
| hsa-miR-130a_st                      | miR-130a-3p               | 1.9                |
| hsa-miR-132_st                       | miR-132-3p                | 3.3                |
| hsa-miR-138_st                       | miR-138-1-3p              | 3.7                |
| hsa-miR-138-1-star_st                | miR-138-5p                | -6.7               |
| hsa-miR-143_st                       | miR-143-3p                | 1.8                |
| hsa-miR-143-star_st                  | miR-143-5p                | 3.2                |
| hsa-miR-146a_st                      | miR-146a-5p               | 7.8                |
| hsa-miR-148a_st                      | miR-148a-3p               | -9.0               |
| hsa-miR-150_st                       | miR-150-5p                | 7.2                |
| hsa-miR-154_st                       | miR-154-5p                | 4.4                |
| hsa-miR-155_st                       | miR-155-5p                | 12.1               |
| hsa-miR-15a_st                       | miR-15a-5p                | 2.0                |
| hsa-miR-15b_st                       | miR-15b-5p                | 2.5                |
| hsa-miR-17_st                        | miR-17-5p                 | -1.7               |
| hsa-miR-181a-star_st                 | miR-181a-3p               | 3.7                |
| hsa-miR-181b_st                      | miR-181b-5p               | 2.6                |
| hsa-miR-181c_st                      | miR-181c-5p               | 4.3                |
| hsa-miR-182_st                       | miR-182-5p                | 18.9               |
| hsa-miR-183_st                       | miR-183-5p                | 1.9                |
| hsa-miR-185_st                       | miR-185-5p                | 2.1                |
| hsa-miR-18a-star_st                  | miR-18a-3p                | 1.7                |
| hsa-miR-192_st                       | miR-192-3p                | -10.1              |
| hsa-miR-192-star_st                  | miR-192-5p                | -24.8              |
| hsa-miR-193a-5p_st                   | miR-193a-5p               | -3.3               |
| hsa-miR-193b_st                      | miR-193b-3p               | -5.1               |
| hsa-miR-193b-star_st                 | miR-193b-5p               | -11.4              |
| hsa-miR-194_st                       | miR-194-3p                | -9.0               |
| hsa-miR-194-star_st                  | miR-194-5p                | -23.6              |
| hsa-miR-1972_st                      | miR-1972                  | 3.6                |
| hsa-miR-1979_st                      | removed from the database | 3.6                |
| hsa-miR-199a-3p_st                   | miR-199a-3p               | 1.9                |
| hsa-miR-199b-3p_st                   | miR-199b-3p               | 1.9                |
| hsa-miR-200a_st                      | miR-200a-3p               | 4.7                |
| hsa-miR-200a-star_st                 | miR-200a-5p               | 2.0                |
| hsa-miR-200b_st                      | miR-200b-3p               | 7.2                |

|                       |              |       |
|-----------------------|--------------|-------|
| hsa-miR-20a_st        | miR-20a-5p   | -2.2  |
| hsa-miR-21_st         | miR-210-3p   | 4.6   |
| hsa-miR-210_st        | miR-212-3p   | -3.2  |
| hsa-miR-212_st        | miR-21-3p    | 7.5   |
| hsa-miR-21-star_st    | miR-21-5p    | 6.5   |
| hsa-miR-221_st        | miR-221-3p   | 2.8   |
| hsa-miR-222_st        | miR-222-3p   | 2.0   |
| hsa-miR-223_st        | miR-223-3p   | 7.8   |
| hsa-miR-23a_st        | miR-23a-3p   | 2.0   |
| hsa-miR-23b-star_st   | miR-23b-5p   | -3.0  |
| hsa-miR-24-2-star_st  | miR-24-2-5p  | 8.7   |
| hsa-miR-27b_st        | miR-27b-3p   | -2.8  |
| hsa-miR-30a_st        | miR-30a-5p   | -2.2  |
| hsa-miR-30b_st        | miR-30b-3p   | -2.4  |
| hsa-miR-30b-star_st   | miR-30b-5p   | -4.5  |
| hsa-miR-30c-1-star_st | miR-30c-1-3p | -2.5  |
| hsa-miR-30e_st        | miR-30e-5p   | -2.5  |
| hsa-miR-31_st         | miR-31-5p    | 3.7   |
| hsa-miR-3175_st       | miR-3175     | 11.1  |
| hsa-miR-3178_st       | miR-3178     | 3.8   |
| hsa-miR-330-3p_st     | miR-330-3p   | 5.0   |
| hsa-miR-342-3p_st     | miR-342-3p   | 2.3   |
| hsa-miR-342-5p_st     | miR-342-5p   | 4.1   |
| hsa-miR-345_st        | miR-345-5p   | -3.5  |
| hsa-miR-34a-star_st   | miR-34a-3p   | 1.9   |
| hsa-miR-363_st        | miR-363-3p   | 5.7   |
| hsa-miR-370_st        | miR-370-3p   | 6.4   |
| hsa-miR-375_st        | miR-375      | -18.6 |
| hsa-miR-376c_st       | miR-376c-3p  | 5.7   |
| hsa-miR-378_st        | miR-378a-3p  | -2.4  |
| hsa-miR-378c_st       | miR-378a-5p  | -2.5  |
| hsa-miR-378-star_st   | miR-378c     | -3.8  |
| hsa-miR-381_st        | miR-381-3p   | 3.3   |
| hsa-miR-382_st        | miR-382-5p   | 9.5   |
| hsa-miR-409-3p_st     | miR-409-3p   | 5.6   |
| hsa-miR-409-5p_st     | miR-409-5p   | 3.9   |
| hsa-miR-421_st        | miR-421      | 4.5   |
| hsa-miR-422a_st       | miR-422a     | -2.3  |
| hsa-miR-4269_st       | miR-4269     | 4.7   |
| hsa-miR-4298_st       | miR-4298     | -2.3  |
| hsa-miR-4306_st       | miR-4306     | 3.4   |
| hsa-miR-431_st        | miR-431-5p   | 4.8   |
| hsa-miR-432_st        | miR-432-5p   | 3.8   |
| hsa-miR-433_st        | miR-433-3p   | 4.4   |
| hsa-miR-452_st        | miR-452-5p   | 3.1   |
| hsa-miR-455-3p_st     | miR-455-3p   | -2.6  |
| hsa-miR-483-5p_st     | miR-483-5p   | -11.5 |
| hsa-miR-485-5p_st     | miR-485-5p   | 2.4   |
| hsa-miR-487a_st       | miR-487a-3p  | 2.8   |
| hsa-miR-493_st        | miR-493-3p   | 5.5   |
| hsa-miR-495_st        | miR-495-3p   | 1.7   |
| hsa-miR-501-5p_st     | miR-501-5p   | 2.9   |
| hsa-miR-503_st        | miR-503-5p   | 4.4   |

|                     |                           |       |
|---------------------|---------------------------|-------|
| hsa-miR-542-5p_st   | miR-542-5p                | 3.3   |
| hsa-miR-543_st      | miR-543                   | 2.5   |
| hsa-miR-574-3p_st   | miR-574-3p                | -4.8  |
| hsa-miR-584_st      | miR-584-5p                | 4.0   |
| hsa-miR-625_st      | miR-625-5p                | 5.5   |
| hsa-miR-629_st      | miR-629-5p                | 6.3   |
| hsa-miR-652_st      | miR-652-3p                | 2.9   |
| hsa-miR-654-3p_st   | miR-654-3p                | 3.0   |
| hsa-miR-665_st      | miR-665                   | 3.8   |
| hsa-miR-885-3p_st   | miR-885-3p                | -5.5  |
| hsa-miR-885-5p_st   | miR-885-5p                | -43.5 |
| hsa-miR-886-3p_st   | removed from the database | 14.4  |
| hsa-miR-99b-star_st | miR-99b-3p                | 5.7   |

**Table S9.** Major microRNAs involved in B-cell development, regulation and response, their potential targets and the differential expression in livers of patients with HBV-associated acute liver failure, compared to normal livers

| miRNA             | Targets                                                                            | Expression (Fold Change) in HBV-Associated Acute Liver Failure                                   |
|-------------------|------------------------------------------------------------------------------------|--------------------------------------------------------------------------------------------------|
| miR-15a           | BCL2 (11,44)                                                                       | 15a-5p <b>2.0</b>                                                                                |
| miR-17-92 cluster | BIM, PTEN (12, 16, 18, 28, 35, 41)                                                 | 17-5p <b>-1.7</b> 20a-5p <b>-2.2</b> 18a-3p <b>1.7</b>                                           |
| miR-21            | PDCD4 (9)                                                                          | 21-5p <b>4.6</b> 21-3p <b>6.5</b>                                                                |
| miR-23b           | BLIMP1 (37, 38)                                                                    | 23b-5p <b>-3.0</b>                                                                               |
| miR-24            | BIM, CASP9 (22)                                                                    | 24-2-5p <b>8.7</b>                                                                               |
| miR-30 family     | AID, BLIMP1 (39, 43, 46), BCL6 (14)                                                | 30a-5p <b>-2.2</b> 30b-5p <b>-2.4</b> 30b-3p <b>-4.5</b> 30c-1-3p <b>-2.5</b> 30e-5p <b>-2.5</b> |
| miR-34a           | FOXP1 (26)                                                                         | 34a-3p <b>1.9</b>                                                                                |
| miR-125b          | ARID3a (25)                                                                        | 125b-2-3p <b>-5.0</b>                                                                            |
| miR-146a          | FAS, FADD, IRAK1, IRAK2, IRF5, TRAF6 (1, 7, 10, 20)                                | 146a-5p <b>7.8</b>                                                                               |
| miR-150           | C-MYB (19, 40, 45)                                                                 | 150-5p <b>7.2</b>                                                                                |
| miR-155           | AID, C-MAF, SHP1, SPII (2, 4, 6, 8, 13, 17, 23, 24, 27, 29, 30, 32-34, 36, 37, 42) | 155-5p <b>12.1</b>                                                                               |
| miR-181a          | BIM, DUSP5, DUSP6, PTPN22, SHP2 (3, 15, 21)                                        | 181a-3p <b>3.7</b>                                                                               |
| miR-181b          | AID, BCL2 (5, 31, 47)                                                              | 181b-5p <b>2.6</b>                                                                               |

- Boldin MP, Taganov KD, Rao DS, Yang L, Zhao JL, Kalwani M, et al. miR-146a is a significant brake on autoimmunity, myeloproliferation, and cancer in mice. *J Exp Med* (2011) 208:1189–201. doi:10.1084/jem.2011
- Calame K. MicroRNA-155 Function in B Cells. *Immunity* 2007; 27: 825–827.
- Chen, C.Z. et al. (2004) MicroRNAs modulate hematopoietic lineage differentiation. *Science* 303, 83–86
- Cosinean S, Zanesi N, Pekarsky Y, Tili E, Volinia S, Heerema N et al. Pre-B cell proliferation and lymphoblastic leukemia/high-grade lymphoma in E(mu)-miR155 transgenic mice. *Proc Natl Acad Sci USA* 2006; 103: 7024–7029.
- de Yébenes VG, Belver L, Pisano DG, Gonzalez S, Villasante A, Croce C, et al. miR-181b negatively regulates activation-induced cytidine deaminase in B cells. *J Exp Med* (2008) 205(10):2199–206. doi:10.1084/jem.20080579
- Dorssett Y, McBride KM, Jankovic M, Gazumyan A, Thai TH, Robbani DF, et al. MicroRNA-155 suppresses activation-induced cytidine deaminase-mediated Myc-Igh translocation. *Immunity* (2008) 28:630–8. doi:10.1016/j.immuni.2008.04.002
- Duroux-Richard I, Jorgensen C, Apparailly F. What do microRNAs mean for rheumatoid arthritis? *Arthritis Rheum* 2012; 64: 11–20.
- Eis PS, Tam W, Sun L, Chadburn A, Li Z, Gomez MF et al. Accumulation of miR-155 and BIC RNA in human B cell lymphomas. *Proc Natl Acad Sci USA* 2005; 102: 3627–3632.
- Garchow BG, Bartulos Encinas O, Leung YT, Tsao PY, Eisenberg RA, Caricchio R et al. Silencing of microRNA-21 in vivo ameliorates autoimmunity splenomegaly in lupus mice. *EMBO Mol Med* 2011; 3: 605–615.
- Guo Q, Zhang J, Li J, Zou L, Zhang J, Xie Z, et al. Forced miR-146a expression causes autoimmune lymphoproliferative syndrome in mice via down-regulation of Fas in germinal center B cells. *Blood* (2013) 121:4875–83. doi:10.1182/blood-2012-08-452425
- Klein U, Lia M, Crespo M, Siegel R, Shen Q, Mo T et al. The DLEU2/ miR-15a/16-1 cluster controls B cell proliferation and its deletion leads to chronic lymphocytic leukemia. *Cancer Cell* 2010; 17: 28–40.
- Koralov SB, Muljo SA, Galler GR, Krek A, Chakraborty T, Kanellopoulou C, et al. Dicer ablation affects antibody diversity and cell survival in the B lymphocyte lineage. *Cell* (2008) 132:860–74. doi:10.1016/j.cell.2008.02.020
- Lagos-Quintana M, Rauhut R, Yalcin A, Meyer J, Lendeckel W, Tuschl T. Identification of tissue-specific microRNAs from mouse. *Curr Biol* 2002; 12: 735–739.
- Lin J, Lwin T, Zhao JJ, et al. Follicular dendritic cell-induced microRNA-mediated upregulation of PRDM1 and downregulation of BCL-6 in non-Hodgkin's B-cell lymphomas. *Leukemia* 2011;25:145-52.
- Lwin T, Lin J, Choi YS, Zhang X, Moscinski LC, Wright KL, et al. Follicular dendritic cell-dependent drug resistance of non-Hodgkin lymphoma involves cell adhesion-mediated Bim down-regulation through induction of microRNA-181a. *Blood* (2010) 116:5228–36. doi:10.1182/blood-2010-02-336487
- Meenhuis A, van Veen PA, de Looper H, van Boxtel N, van den Berge IJ, Sun SM, et al. MiR-17/20/93/106 promote hematopoietic cell expansion by target-ing sequestosome 1-regulated pathways in mice. *Blood* (2011) 118(4):916–25. doi:10.1182/blood-2011-02-336487
- Metzler M, Wilda M, Busch K, Viehmann S, Borkhardt A. High expression of precursor microRNA-155/BIC RNA in children with Burkitt lymphoma. *Genes Chromosomes Cancer* 2004; 39: 167–169.
- Mogilyansky E, Rigoutsos I. The miR-17/92 cluster: a comprehensive update on its genomics, genetics, functions and increasingly important and numerous roles in health and disease. *Cell Death Differ* (2013) 20(12):1603–14. doi:10.1038/cdd.2013.125
- Monticelli S, Ansel KM, Xiao C, Succi ND, Krichevsky AM, Thai TH et al. MicroRNA profiling of the murine hematopoietic system. *Genome Biol* 2005; 6: R71.
- Nakasa T, Miyaki S, Okubo A, Hashimoto M, Nishida K, Ochi M et al. Expression of microRNA-146 in rheumatoid arthritis synovial tissue. *Arthritis Rheum* 2008; 58: 1284–1292.
- Neilson, J.R. et al. (2007) Dynamic regulation of miRNA expression in ordered stages of cellular development. *Genes Dev.* 21, 578–589
- Nguyen T, Rich A, Dahl R. MiR-24 promotes the survival of hematopoietic cells. *PLoS One* (2013) 8:e55406. doi:10.1371/journal.pone.0055406
- O'Connell RM, Chaudhuri AA, Rao DS, Baltimore D. Inositol phosphatase SHIP1 is a primary target of miR-155. *Proc Natl Acad Sci U S A* (2009) 106(17):7113–8. doi:10.1073/pnas.0902636106
- Pedersen IM, Otero D, Kao E, Miletic AV, Hother C, Ralfkjaer E, et al. Onco- miR-155 targets SHIP1 to promote TNFalpha-dependent growth of B cell lymphomas. *EMBO Mol Med* (2009) 1:288–95. doi:10.1002/emmm.200900028
- Puissegur MP, Eichner R, Quelen C, Couaud E, Mari B, Lebrigand K, et al. B-cell regulator of immunoglobulin heavy chain transcription (Bright)/ARID3a is a direct target of the oncomir microRNA-125b in progenitor B-cells. *Leukemia* 2012; 26: 2224–2232.
- Rao DS, O'connell RM, Chaudhuri AA, Garcia-Flores Y, Geiger TL, Bal-timore D. MicroRNA-34a perturbs B lymphocyte development by repress-ing the forkhead box transcription factor Foxp1. *Immunity* (2010) 33:48–59. doi:10.1016/j.immuni.2010.06.013
- Rodriguez A, Vigorito E, Clare S, Warren MV, Couttet P, Soond DR et al. Requirement of bic/microRNA-155 for normal immune function. *Science* 2007; 316: 608–611.
- Serva A, Knapp B, Tsai YT, Claas C, Lissauskas T, Matula P, et al. miR-17-5p regulates endocytic trafficking through targeting TBC1D2/Arms. *PLoS One* (2012) 7(12):e52555. doi:10.1371/journal.pone.0052555
- Singh H, Pongubala JM, Medina KL. Gene regulatory networks that orchestrate the development of B lymphocyte precursors. *Adv Exp Med Biol* 2007; 596: 57–62.
- Sonkoly E, Stahl M, Pivarsci A. MicroRNAs and immunity: novel players in the regulation of normal immune function and inflammation. *Semin Cancer Biol* 2008; 18: 131–140.
- Tekirdag KA, Korkmaz G, Ozturk DG, Agami R, Gozuacik D. MIR181A regulates starvation- and rapamycin-induced autophagy through targeting of ATG5. *Autophagy* (2013) 9(3):374–85. doi:10.4161/auto.23117
- Teng G, Hakimpour P, Landgraf P, Rice A, Tuschl T, Casellas R, et al. MicroRNA-155 is a negative regulator of activation-induced cytidine deaminase. *Immunity* (2008) 28(5):621–9. doi:10.1016/j.immuni.2008.03.015
- Thai TH, Calado DP, Casola S, Ansel KM, Xiao C, Xue Y et al. Regulation of the germinal center response by microRNA-155. *Science* 2007; 316: 604–608.
- van den Berg A, Kroesen BJ, Kooistra K, de Jong D, Briggs J, Blokzijl T et al. High expression of B-cell receptor inducible gene BIC in all subtypes of Hodgkin lymphoma. *Genes Chromosomes Cancer* 2003; 37: 20–28.
- Ventura A, Young AG, Winslow MM, Lintaui L, Meissner A, Erkeland SJ et al. Targeted deletion reveals essential and overlapping functions of the miR-17 through 92 family of miRNA clusters. *Cell* 2008; 132: 875–886.
- Vigorito E, Perks KL, Abreu-Goodger C, Bunting S, Xiang Z, Kohlhaas S, et al. microRNA-155 regulates the generation of immunoglobulin class-switched plasma cells. *Immunity* (2007) 27:847–59. doi:10.1016/j.immuni.2007.10.009
- Wan G, Xie W, Liu Z, Xu W, Lao Y, Huang N, et al. Hypoxia-induced MIR155 is a potent autophagy inducer by targeting multiple players in the MTOR pathway. *Autophagy* (2014) 10(1):70–9. doi:10.4161/auto.26534
- Wang P, Zhang J, Zhang L, Zhu Z, Fan J, Chen L, et al. MicroRNA 23b regulates autophagy associated with radioresistance of pancreatic cancer cells. *Gastroenterology* (2013) 145(5): 1133–43.e12. doi:10.1053/j.gastro.2013.07.048
- White CA, Pone EJ, Lam T, Tat C, Hayama KL, Li G, et al. Histone deacetylase inhibitors upregulate B cell microRNAs that silence AID and Blimp-1 expression for epigenetic modulation of antibody and autoantibody responses. *J Immunol* (2014) 193(12):5933–50. doi:10.1093/infdis/jir111
- Yu Y, Yang L, Zhao M, Zhu S, Kang R, Vernon P, et al. Targeting microRNA-30a-mediated autophagy enhances imatinib activity against human chronic myeloid leukemia cells. *Leukemia* (2012) 26(8):1752–60. doi:10.1038/leu.2012.65
- Yuan Y, Kasar S, Underbayev C, Vollenweider D, Salerno E, Kotenko SV et al. Role of microRNA-15a in autoantibody production in interferon-augmented murine model of lupus. *Mol Immunol* 2012; 52: 61–70.
- Zhou B, Wang S, Mayr C, Bartel DP, Lodish HF. miR-150, a microRNA expressed in mature B and T cells, blocks early B cell development when expressed prematurely. *Proc Natl Acad Sci USA* 2007; 104: 7080–7085.
- Zhu H, Wu H, Liu X, Li B, Chen Y, Ren X, et al. Regulation of autophagy by a beclin 1-targeted microRNA, miR-30a, in cancer cells. *Autophagy* (2009) 5(6):816–23. doi:10.4161/auto.9064
- Zhu W, Shan X, Wang T, Shu Y, Liu P. miR-181b modulates multidrug resistance by targeting BCL2 in human cancer cell lines. *Int J Cancer* 2010; 127: 520-529.

**Table S10.** Results of phage-display library screening for antigen- specific Fab clones after three cycles of panning

| Patient/Chimpanzee     | Antibody Library | Antigen   | % Positive Clones<br>(from 96 Clones<br>Screened) |
|------------------------|------------------|-----------|---------------------------------------------------|
| <b>Patient 31</b>      | IgM              | BSA       | 0                                                 |
|                        |                  | 31 HBsAg  | 0                                                 |
|                        |                  | 31 HBcAg  | 99                                                |
|                        | IgG              | BSA       | 0                                                 |
|                        |                  | 31 HBsAg  | 0                                                 |
|                        |                  | 31 HBcAg  | 92                                                |
| <b>Patient 32</b>      | IgM              | BSA       | 0                                                 |
|                        |                  | 32 HBsAg  | 0                                                 |
|                        |                  | 32 HBcAg  | 93                                                |
|                        | IgG              | BSA       | 0                                                 |
|                        |                  | 32 HBsAg  | 0                                                 |
|                        |                  | 32 HBcAg  | 99                                                |
| <b>Patient 219</b>     | IgM              | BSA       | 0                                                 |
|                        |                  | 219 HBsAg | 0                                                 |
|                        |                  | 219 HBcAg | 96                                                |
|                        | IgG              | BSA       | 0                                                 |
|                        |                  | 219 HBsAg | 0                                                 |
|                        |                  | 219 HBcAg | 92                                                |
| <b>Patient 241</b>     | IgM              | BSA       | 0                                                 |
|                        |                  | 241 HBsAg | 0                                                 |
|                        |                  | 241 HBcAg | 98                                                |
|                        | IgG              | BSA       | 0                                                 |
|                        |                  | 241 HBsAg | 0                                                 |
|                        |                  | 241 HBcAg | 95                                                |
| <b>Chimpanzee 1627</b> | IgG              | BSA       | 0                                                 |
|                        |                  | Ayw HBsAg | 0                                                 |
|                        |                  | Ayw HBcAg | 98                                                |
| <b>Chimpanzee 5835</b> | IgG              | BSA       | 0                                                 |
|                        |                  | Ayw HBsAg | 0                                                 |
|                        |                  | Ayw HBcAg | 100                                               |

**Table S11.** Titer of HBcAg-specific IgM and IgG extracted from the liver of patients with HBV-associated acute liver failure (ALF) and from one healthy liver donor

| HBcAg      | Healthy Donor |            | ALF Patients |            |            |            |
|------------|---------------|------------|--------------|------------|------------|------------|
|            | IgM           | 2PF<br>IgG | 219<br>IgM   | 219<br>IgG | 241<br>IgM | 241<br>IgG |
| <b>ayw</b> | 0             | 0          | 1:2430       | 1:810      | 1:1260     | 1:1260     |
| <b>219</b> | 0             | 0          | 1:2430       | 1:2430     | 1:3777     | 1:3777     |
| <b>241</b> | 0             | 0          | 1:2430       | 1:2430     | 1:3777     | 1:11,330   |

**Table S12.** Identical V(D)J sequences appearing in both IgG and IgM samples in patients with acute liver failure

| Patient | Group ID | Sequence ID            | V(D)J Sequences   |                                                                                                                                                  |
|---------|----------|------------------------|-------------------|--------------------------------------------------------------------------------------------------------------------------------------------------|
| 241     | 1        | 241IgM_B1<br>(2)*      | 241IgG_F7<br>(1)  | LEESGGGLVKPGGSLRLSACAASGFTFSSNAWMSWVRQAPGKGLEWVGR<br>IKSKTDGGTTDYAAPVKGRFTISRDDSKNTLYLQMNSLKTEDTAVYY<br><b>CTTDLVVPAAAMYSYYYYYGMDVWGQGT</b> TVTV |
|         |          | 241IgM_B4<br>(1)       | 241IgG_A12<br>(2) | LEQSGGGVVQPGRSLRLSACAASGFTFSSYAMHWVRQAPGKGLEWVAV<br>ISYDGSNKYYADSVKGRFTISRDNKNTLYLQMNSLRAEDTAVYY <b>CA<br/>RDLLPSLGYSSLLGYWGQGT</b> LVTVS        |
|         | 3        | 241IgM_B8<br>(2)       | 241IgG_A7<br>(2)  | LEESGGGVVQPGRSLRLSACAASGFTFSSYAMHWVRQAPGKGLEWVAV<br>ISYDGSNKYYADSVKGRFTISRDNKNTLYLQMNSLRAEDTAVYY <b>CA<br/>RDLLPDIAVAGTRGPGYWQGT</b> LVTVS       |
|         |          | 241IgM_B1<br>1<br>(1)  | 241IgG_F2<br>(6)  | LEESGGGVVQPGRSLRLSACAASGFTFSSYAMHWVRQAPGKGLEWVAV<br>ISYDGSNKYYADSVKGRFTISRDNKNTLYLQMNSLRAEDTAVYY <b>CA<br/>RALLPGIAAAGSSELGYWGQGT</b> LVTVS      |
|         | 5        | 241IgM_D6<br>(1)       | 241IgG_H2<br>(6)  | LEQSGAEVKKPGASVKVCSKASGYTFTSYMHWVRQAPGQGLEWMGI<br>INPSGGSTSYAQKFQGRVTMTTRDTSTSTVYMELSSLRSED <b>TAVYYCA<br/>RDWGFYSSGYYYGMDVWGQGT</b> TVTVS       |
|         | 6        | 241IgM_E2<br>(3)       | 241IgG_F6<br>(3)  | LEQSGGGVVQPGRSLRLSACAASGFTFSSYAMHWVRQAPGKGLEWVAV<br>ISYDGSNKYYADSVKGRFTISRDNKNTLYLQMNSLRAEDTAVYY <b>CA<br/>RDLLPSITMIPSLGYWGQGT</b> LVTVS        |
|         | 7        | 241IgM_F1<br>0<br>(10) | 241IgG_H6<br>(14) | LEQSGGGGLVKPGGSLRLSACAASGFTFSSNAWMSWVRQAPGKGLEWVGR<br>IKSKTDGGTTDYAAPVKGRFTISRDDSKNTLYLQMNSLKTEDTAVYY<br><b>CTTDLREVDSYGYYYYYGMDVWGQGT</b> TVTV  |
| 31      | 8        | 31IgM_B10<br>(2)       | 31IgG_C10<br>(1)  | LEESGGGLVKPGGSLRLSACAASGFTFSDYMSWIRQAPGKGLEWVSY<br>ISSSGSTIYYADSVKGRFTISRDNKNTLYLQMNSLRAEDTAVYY <b>CA<br/>RDVYDSSGYYYGLDYWGQGT</b> LVTVS         |
|         |          | 31IgM_D5<br>(1)        | 31IgG_D7<br>(6)   | LEQSGGGLVQPGGSLRLSACAASGFTFSSYAMSWVRQAPGKGLEWVSA<br>ISGSGGSTYYADSVKGRFTISRDNKNTLYLQMNSLRAEDTAVYY <b>CA<br/>KEGVAVAGFTPFDYWGQGT</b> LVTVS         |
|         | 10       | 31IgM_F7<br>(1)        | 31IgG_D3<br>(1)   | LEQSGGGLVQPGGSLRLSACAASGFTFSSYAMSWVRQAPGKGLEWVSA<br>ISGSGGSTYYADSVKGRFTISRDNKNTLYLQMNSLRAEDTAVYY <b>CA<br/>KEFVDTAMVTPLDYWGQGT</b> LVTVS         |
|         | 11       | 31IgM_F10<br>(3)       | 31IgG_F5<br>(2)   | LEQSGAEVKKPGASVKVCSKASGYTFTSYAMHWVRQAPGQGLEWMGI<br>INAGNGNTKYSQKFQGRVTITRDTASTAYMELSSLRSED <b>TAVYYCA<br/>RAMHLDDYYYYGMDVWGQGT</b> TVTVS         |
|         | 12       | 31IgM_G9<br>(17)       | 31IgG_C11<br>(6)  | LEQSGAEVKKPGASVKVCSKASGYTFTSYGISWVRQAPGQGLEWMGI<br>ISAYNGNTNYAQKLQGRVTMTTDTSTSTAYMELRSLRSD <b>TAVYYCA<br/>RGLYYDYVWGSYRLDYWGQGT</b> LVTVS        |
| 219     | 13       | 219IgM_A9<br>(66)      | 219IgG_D6<br>(21) | LEESGGGLVQPGGSLRLSACAASGFTFSSYAMSWVRQAPGKGLEWVSG<br>ISDSGGNTYYADSVKGRFTISRDNKNTLYLQMNSLRADD <b>TAVYYCA<br/>KDLLWEPRGYFDYWQGT</b> LVTVS           |
|         | 14       | 219IgM_G1<br>0<br>(4)  | 219IgG_G3<br>(1)  | LEESGGGLVQPGGSLRLTCAVSGFTFSSYAMSWVRQAPGKGLEWVSG<br>ISDSGDNTYYADSVKGRFTISRDNKNTLYLQMNSLRADD <b>TAVYYCA<br/>KDLLWEPRGYFDYWQGT</b> LVTVS            |
| 32      | 15       | 32IgM_A6<br>(80)       | 32IgG_E1<br>(82)  | LEESGGGLVQPGGSLRLSACAASGFTFSSYAMSWVRQAPGKGLEWVSA<br>ISGSGGSTYYADSVKGRFTISRDNKNTLYLQMNSLRAEDTAVYY <b>CA<br/>KYPWGETNGAFDIWGQGT</b> MVTVS          |
| 31/32   | 16       | 32IgM_C4<br>(1)        | 31IgG_H11<br>(3)  | LEQSGGGLVQPGGSLRLSACAASGFTFSSYAMSWVRQAPGKGLEWVSA<br>ISGSGGSTYYADSVKGRFTISRDNKNTLYLQMNSLRAEDTAVYY <b>CA<br/>KFPWDTAMGPFDYWGQGT</b> LVTVSSAS       |

\*Numbers in parenthesis represent the repeat number (prevalence) of the sequence. The HCDR3 (VDJ junction) are shown in blue color.



**Table S13.** Sequence alignment of IgG and IgM antibodies in patients with acute liver failure. The group IDs are the same as those presented in Table S12

**IgM sequence alignment of group ID 1**

```
IGHV3-15*01  EVQLVESGGGLVLPKPGGSLRLSCAASGFTFSNAMMSWVRQAPGKLEWVGRISKSDGCTTDYAAPVKGRFTISRDDSKNTLYLQMNSLKTEDTAVYYCTT-----
241IgM_B1    ---.E.-----DLVVPAAMYSYIIYGMVDVWGQGTITVTS
241IgM_D3    ---.E.-----DLVVPAAMYSYIIYGMVDVWGQGTITVTS
```

**IgG sequence alignment of group ID 1**

```
IGHV3-15*01  EVQLVESGGGLVLPKPGGSLRLSCAASGFTFSNAMMSWVRQAPGKLEWVGRISKSDGCTTDYAAPVKGRFTISRDDSKNTLYLQMNSLKTEDTAVYYCTT-----
241IgG_F7    ---.EQ.-----DLVVPAAMYSYIIYGMVDVWGQGTITVTS
```

**IgM sequence alignment of group ID 2**

```
IGHV3-30-3*01 QVQLVESGGGVVQPGKSLRLSCAASGFTFSSYAMHWVRQAPGKLEWVAVISYDGSNKYYADSVKGRFTISRDNKNTLYLQMNSLRAEDTAVYYCAR-----
241IgM_B4    ---.EQ.-----DLLPSLGYSSLLGYWGQGTITVTS
```

**IgG sequence alignment of group ID 2**

```
IGHV3-30-3*01 QVQLVESGGGVVQPGKSLRLSCAASGFTFSSYAMHWVRQAPGKLEWVAVISYDGSNKYYADSVKGRFTISRDNKNTLYLQMNSLRAEDTAVYYCAR-----
241IgG_A12   ---.E.-----DLLPSLGYSSLLGYWGQGTITVTS
241IgG_F3    ---.E.-----DLLPSLGYSSLLGYWGQGTITVTS
```

**IgM sequence alignment of group ID 3**

```
IGHV3-30-3*01 QVQLVESGGGVVQPGKSLRLSCAASGFTFSSYAMHWVRQAPGKLEWVAVISYDGSNKYYADSVKGRFTISRDNKNTLYLQMNSLRAEDTAVYYCAR-----
241IgM_B8    ---.E.-----DLLPDIIVAGTRGPGYWGQGTITVTS
241IgM_G7    ---.E.-----DLLPDIIVAGTRGPGYWGQGTITVTS
```

**IgG sequence alignment of group ID 3**

```
IGHV3-30-3*01 QVQLVESGGGVVQPGKSLRLSCAASGFTFSSYAMHWVRQAPGKLEWVAVISYDGSNKYYADSVKGRFTISRDNKNTLYLQMNSLRAEDTAVYYCAR-----
241IgG_A7    ---.E.-----DLLPDIIVAGTRGPGYWGQGTITVTS
241IgG_C2    ---.EQ.-----DLLPDIIVAGTRGPGYWGQGTITVTS
```

**IgM sequence alignment of group ID 4**

```
IGHV3-30-3*01 QVQLVESGGGVVQPGKSLRLSCAASGFTFSSYAMHWVRQAPGKLEWVAVISYDGSNKYYADSVKGRFTISRDNKNTLYLQMNSLRAEDTAVYYCAR-----
241IgM_B11   ---.E.-----ALLPGIAAAGSSELGYWGQGTITVTS
```

**IgG sequence alignment of group ID 4**

```
IGHV3-30-3*01 QVQLVESGGGVVQPGKSLRLSCAASGFTFSSYAMHWVRQAPGKLEWVAVISYDGSNKYYADSVKGRFTISRDNKNTLYLQMNSLRAEDTAVYYCAR-----
241IgG_F2    ---.E.-----ALLPGIAAAGSSELGYWGQGTITVTS
241IgG_H4    ---.EQ.-----ALLPGIAAAGSSELGYWGQGTITVTS
241IgG_C9    ---.EQ.-----ALLPGIAAAGSSELGYWGQGTITVTS
241IgG_A11   ---.EQ.-----ALLPGIAAAGSSELGYWGQGTITVTS
241IgG_A6    ---.EQ.-----ALLPGIAAAGSSELGYWGQGTITVTS
241IgG_A1    ---.E.-----ALLPGIAAAGSSELGYWGQGTITVTS
```

**IgM sequence alignment of group ID 5**

```
IGHV1-46*01  LVQSGAEVKKPGASVKVSCKASGYTFTSYMHWRQAPGKLEWVGIIINPSGGSTSYAQKFGQVMTTRDTSTSTVYMEISSLRSEDVAVYYCAR-----
241IgM_D6    .E.-----DWGFYSSGYYGMVDVWGQGTITVTS
```

**IgG sequence alignment of group ID 5**

```
IGHV1-46*01  LVQSGAEVKKPGASVKVSCKASGYTFTSYMHWRQAPGKLEWVGIIINPSGGSTSYAQKFGQVMTTRDTSTSTVYMEISSLRSEDVAVYYCAR-----
241IgG_H2    .E.-----DWGFYSSGYYGMVDVWGQGTITVTS
241IgG_F12   .E.-----DWGFYSSGYYGMVDVWGQGTITVTS
241IgG_F10   .E.-----DWGFYSSGYYGMVDVWGQGTITVTS
241IgG_C7    .E.-----DWGFYSSGYYGMVDVWGQGTITVTS
241IgG_F1    .E.-----DWGFYSSGYYGMVDVWGQGTITVTS
241IgG_H10   .E.-----DWGFYSSGYYGMVDVWGQGTITVTS
```

**IgM sequence alignment of group ID 6**

```
IGHV3-30-3*01 QVQLVESGGGVVQPGKSLRLSCAASGFTFSSYAMHWVRQAPGKLEWVAVISYDGSNKYYADSVKGRFTISRDNKNTLYLQMNSLRAEDTAVYYCAR-----
241IgM_E2    ---.E.-----DLLPSITMIPSLGYWGQGTITVTS
241IgM_A2    ---.E.-----DLLPSITMIPSLGYWGQGTITVTS
241IgM_H2    ---.E.-----DLLPSITMIPSLGYWGQGTITVTS
```

**IgG sequence alignment of group ID 6**

```
IGHV3-30-3*01 QVQLVESGGGVVQPGKSLRLSCAASGFTFSSYAMHWVRQAPGKLEWVAVISYDGSNKYYADSVKGRFTISRDNKNTLYLQMNSLRAEDTAVYYCAR-----
241IgG_F6    ---.EQ.-----DLLPSITMIPSLGYWGQGTITVTS
241IgG_H5    ---.E.-----DLLPSITMIPSLGYWGQGTITVTS
241IgG_D7    ---.E.-----DLLPSITMIPSLGYWGQGTITVTS
```

### IgM sequence alignment of group ID 7

```
IGHV3-15*01 EVQLVESGGGLVQPGGSLRLSCAASGFTFSNAWMSVWRQAPGKLEWVGRISKTDGGTTDYAAPVKGRFTISRDDSKNTLYLQMNSLKTEDTAVYYCT-----
241IgM_F10 ---.EQ. .... .DLREVDSYGYGYYYYYGMDVWGQGTITVTV-----
241IgM_E9 ---.EQ. .... .DLREVDSYGYGYYYYYGMDVWGQGTITVTV-----
241IgM_H7 ---.EQ. .... .DLREVDSYGYGYYYYYGMDVWGQGTITVTV-----
241IgM_G4 ---.EQ. .... .DLREVDSYGYGYYYYYGMDVWGQGTITVTV-----
241IgM_E10 ---.E. .... .DLREVDSYGYGYYYYYGMDVWGQGTITVTV-----
241IgM_A9 ---.E. .... .DLREVDSYGYGYYYYYGMDVWGQGTITVTV-----
241IgM_B10 ---.E. .... .DLREVDSYGYGYYYYYGMDVWGQGTITVTV-----
241IgM_A3 ---.E. .... .DLREVDSYGYGYYYYYGMDVWGQGTITVTV-----
241IgM_B9 ---.E. .... .DLREVDSYGYGYYYYYGMDVWGQGTITVTV-----
241IgM_H5 ---.E. .... .DLREVDSYGYGYYYYYGMDVWGQGTITVTV-----
```

### IgG sequence alignment of group ID 7

```
IGHV3-15*01 EVQLVESGGGLVQPGGSLRLSCAASGFTFSNAWMSVWRQAPGKLEWVGRISKTDGGTTDYAAPVKGRFTISRDDSKNTLYLQMNSLKTEDTAVYYCT-----
241IgG_H6 ---.EQ. .... .DLREVDSYGYGYYYYYGMDVWGQGTITVTV-----
241IgG_H11 ---.EQ. .... .DLREVDSYGYGYYYYYGMDVWGQGTITVTV-----
241IgG_F8 ---.EQ. .... .DLREVDSYGYGYYYYYGMDVWGQGTITVTV-----
241IgG_D4 ---.EQ. .... .DLREVDSYGYGYYYYYGMDVWGQGTITVTV-----
241IgG_H3 ---.EQ. .... .DLREVDSYGYGYYYYYGMDVWGQGTITVTV-----
241IgG_H8 ---.EQ. .... .DLREVDSYGYGYYYYYGMDVWGQGTITVTV-----
241IgG_C5 ---.E. .... .DLREVDSYGYGYYYYYGMDVWGQGTITVTV-----
241IgG_C8 ---.E. .... .DLREVDSYGYGYYYYYGMDVWGQGTITVTV-----
241IgG_D12 ---.E. .... .DLREVDSYGYGYYYYYGMDVWGQGTITVTV-----
241IgG_H7 ---.E. .... .DLREVDSYGYGYYYYYGMDVWGQGTITVTV-----
241IgG_H9 ---.E. .... .DLREVDSYGYGYYYYYGMDVWGQGTITVTV-----
241IgG_A5 ---.EQ. .... .DLREVDSYGYGYYYYYGMDVWGQGTITVTV-----
241IgG_C4 ---.EQ. .... .DLREVDSYGYGYYYYYGMDVWGQGTITVTV-----
241IgG_F4 ---.EQ. .... .DLREVDSYGYGYYYYYGMDVWGQGTITVTV-----
                .V.Q. .... .DLREVDSYGYGYYYYYGMDVWGQGTITVTV-----
```

### IgM sequence alignment of group ID 8

```
IGHV3-11*01 QVQLVESGGGLVQPGGSLRLSCAASGFTFSNYAMSWIRQAPGKLEWVSYISSSGSTIYYADSVKGRFTISRDNKNSLYLQMNSLRAEDTAVYYCARE-----
31IgM_B10 ---.E. .... .DVYYDSSGYYYGLDYWGQGTITVTV-----
31IgM_E10 ---.E. .... .DVYYDSSGYYYGLDYWGQGTITVTV-----
```

### IgG sequence alignment of group ID 8

```
IGHV3-11*01 QVQLVESGGGLVQPGGSLRLSCAASGFTFSNYAMSWIRQAPGKLEWVSYISSSGSTIYYADSVKGRFTISRDNKNSLYLQMNSLRAEDTAVYYCARE-----
31IgG_C10 ---.EQ. .... .DVYYDSSGYYYGLDYWGQGTITVTV-----
```

### IgM sequence alignment of group ID 9

```
IGHV3-23*01 EVQLLESQGGGLVQPGGSLRLSCAASGFTFSSYAMSWVRQAPGKLEWVSAISGSGGSTYYADSVKGRFTISRDNKNTLYLQMNSLRAEDTAVYYCAK-----
31IgM_D5 ---.EQ. .... .EGVAVAGFTPFDDYWGQGTITVTV-----
```

### IgG sequence alignment of group ID 9

```
IGHV3-23*01 EVQLLESQGGGLVQPGGSLRLSCAASGFTFSSYAMSWVRQAPGKLEWVSAISGSGGSTYYADSVKGRFTISRDNKNTLYLQMNSLRAEDTAVYYCAK-----
31IgG_D7 ---.EQ. .... .EGVAVAGFTPFDDYWGQGTITVTV-----
31IgG_F8 ---.EQ. .... .EGVAVAGFTPFDDYWGQGTITVTV-----
31IgG_F9 ---.EQ. .... .EGVAVAGFTPFDDYWGQGTITVTV-----
31IgG_B4 ---.EQ. .... .EGVAVAGFTPFDDYWGQGTITVTV-----
31IgG_A11 ---.EQ. .... .EGVAVAGFTPFDDYWGQGTITVTV-----
31IgG_G10 ---.EQ. .... .EGVAVAGFTPFDDYWGQGTITVTV-----
```

### IgM sequence alignment of group ID 10

```
IGHV3-23*01 EVQLLESQGGGLVQPGGSLRLSCAASGFTFSSYAMSWVRQAPGKLEWVSAISGSGGSTYYADSVKGRFTISRDNKNTLYLQMNSLRAEDTAVYYCAK-----
31IgM_F7 ---.EQ. .... .EFVDTAMVTPLDYWGQGTITVTV-----
```

### IgG sequence alignment of group ID 10

```
IGHV3-23*01 EVQLLESQGGGLVQPGGSLRLSCAASGFTFSSYAMSWVRQAPGKLEWVSAISGSGGSTYYADSVKGRFTISRDNKNTLYLQMNSLRAEDTAVYYCAK-----
31IgG_D3 ---.EQ. .... .EFVDTAMVTPLDYWGQGTITVTV-----
```

### IgM sequence alignment of group ID 11

```
IGHV1-3*01 LVQSGAEVKKPGASVKVSKASGYFTFSYAMHWVRQAPGQRLIEWMGWINAGNGNTKYSQKFGQGRVTITRDTSASTAYMELSSLRSEDVAVYYCAR-----
31IgM_F10 .E. .... .AMHLDDYYYYGMDVWGQGTITVTV-----
31IgM_E1 .E. .... .AMHLDDYYYYGMDVWGQGTITVTV-----
31IgM_F12 .E. .... .AMHLDDYYYYGMDVWGQGTITVTV-----
```

### IgG sequence alignment of group ID 11

```
IGHV1-3*01 LVQSGAEVKKPGASVKVSKASGYFTFSYAMHWVRQAPGQRLIEWMGWINAGNGNTKYSQKFGQGRVTITRDTSASTAYMELSSLRSEDVAVYYCAR-----
31IgG_F5 .E. .... .AMHLDDYYYYGMDVWGQGTITVTV-----
32IgG_F12 .E. .... .AMHLDDYYYYGMDVWGQGTITVTV-----
```

### IgM sequence alignment of group ID 12

```
IGHV1-18*01 QVQLVQSGAEVKKPGASVKVSCKASGYTFSTYGISWVRQAPGQGLEWMGWI SAYNGNTNYAQKLGQRVIMTTDTSTSTAYMELRSLRSDDTAVYYCAR-----
31IgM_G9      ---.E.....GLYYDYVWGSYRLDYWGQGLTVTVS
31IgM_G1      ---.E.....GLYYDYVWGSYRLDYWGQGLTVTVS
31IgM_D1      ---.E.....GLYYDYVWGSYRLDYWGQGLTVTVS
31IgM_D4      ---.E.....GLYYDYVWGSYRLDYWGQGLTVTVS
31IgM_E3      ---.E.....GLYYDYVWGSYRLDYWGQGLTVTVS
31IgM_B12     ---.E.....GLYYDYVWGSYRLDYWGQGLTVTVS
31IgM_B2      ---.E.....GLYYDYVWGSYRLDYWGQGLTVTVS
31IgM_C3      ---.E.....GLYYDYVWGSYRLDYWGQGLTVTVS
31IgM_C4      ---.E.....GLYYDYVWGSYRLDYWGQGLTVTVS
31IgM_C8      ---.E.....GLYYDYVWGSYRLDYWGQGLTVTVS
31IgM_A8      ---.E.....GLYYDYVWGSYRLDYWGQGLTVTVS
31IgM_A9      ---.E.....GLYYDYVWGSYRLDYWGQGLTVTVS
31IgM_A7      ---.E.....GLYYDYVWGSYRLDYWGQGLTVTVS
31IgM_F5      ---.E.....GLYYDYVWGSYRLDYWGQGLTVTVS
31IgM_H10     ---.E.....GLYYDYVWGSYRLDYWGQGLTVTVS
31IgM_G5      ---.E.....V.....GLYYDYVWGSYRLDYWGQGLTVTVS
31IgM_G2      ---.E.....V.....GLYYDYVWGSYRLDYWGQGLTVTVS
```

### IgG sequence alignment of group ID 12

```
IGHV1-18*01 QVQLVQSGAEVKKPGASVKVSCKASGYTFSTYGISWVRQAPGQGLEWMGWI SAYNGNTNYAQKLGQRVIMTTDTSTSTAYMELRSLRSDDTAVYYCAR-----
31IgG_C11    ---.E.....GLYYDYVWGSYRLDYWGQGLTVTVS
31IgG_A2     ---.E.....GLYYDYVWGSYRLDYWGQGLTVTVS
31IgG_E3     ---.E.....GLYYDYVWGSYRLDYWGQGLTVTVS
31IgG_E5     ---.E.....GLYYDYVWGSYRLDYWGQGLTVTVS
31IgG_E6     ---.E.....GLYYDYVWGSYRLDYWGQGLTVTVS
31IgG_B7     ---.E.....GLYYDYVWGSYRLDYWGQGLTVTVS
```

### IgM sequence alignment of group ID 13

```
IGHV3-23*01 EVQLLESGGGLVQPGGSLRLSCAASGFTFSYAMS WVRQAPGKLEWVSAISGGSTYYADSVKGRFTISRDN SKNTLYLQMNSLR AEDTAVYYCAK-----
219IgM_A9    ---.E.....V.....G.D.N.....L.....D.....DLLWEPRGYFDYWGQGLTVTVS
219IgM_H10   ---.E.....V.....G.D.N.....L.....D.....DLLWEPRGYFDYWGQGLTVTVS
219IgM_F3    ---.E.....V.....G.D.N.....L.....D.....DLLWEPRGYFDYWGQGLTVTVS
219IgM_H12   ---.E.....V.....G.D.N.....L.....D.....DLLWEPRGYFDYWGQGLTVTVS
219IgM_G1    ---.E.....V.....G.D.N.....L.....D.....DLLWEPRGYFDYWGQGLTVTVS
219IgM_F5    ---.E.....V.....G.D.N.....L.....D.....DLLWEPRGYFDYWGQGLTVTVS
219IgM_E6    ---.E.....V.....G.D.N.....L.....D.....DLLWEPRGYFDYWGQGLTVTVS
219IgM_F8    ---.E.....V.....G.D.N.....L.....D.....DLLWEPRGYFDYWGQGLTVTVS
219IgM_H11   ---.E.....V.....G.D.N.....L.....D.....DLLWEPRGYFDYWGQGLTVTVS
219IgM_F6    ---.E.....V.....G.D.N.....L.....D.....DLLWEPRGYFDYWGQGLTVTVS
219IgM_H9    ---.E.....V.....G.D.N.....L.....D.....DLLWEPRGYFDYWGQGLTVTVS
219IgM_H8    ---.E.....V.....G.D.N.....L.....D.....DLLWEPRGYFDYWGQGLTVTVS
219IgM_C1    ---.E.....V.....G.D.N.....L.....D.....DLLWEPRGYFDYWGQGLTVTVS
219IgM_B10   ---.E.....V.....G.D.N.....L.....D.....DLLWEPRGYFDYWGQGLTVTVS
219IgM_C2    ---.E.....V.....G.D.N.....L.....D.....DLLWEPRGYFDYWGQGLTVTVS
219IgM_H2    ---.E.....V.....G.D.N.....L.....D.....DLLWEPRGYFDYWGQGLTVTVS
219IgM_H5    ---.E.....V.....G.D.N.....L.....D.....DLLWEPRGYFDYWGQGLTVTVS
219IgM_C3    ---.E.....V.....G.D.N.....L.....D.....DLLWEPRGYFDYWGQGLTVTVS
219IgM_H6    ---.E.....V.....G.D.N.....L.....D.....DLLWEPRGYFDYWGQGLTVTVS
219IgM_A12   ---.E.....V.....G.D.N.....L.....D.....DLLWEPRGYFDYWGQGLTVTVS
219IgM_A11   ---.E.....V.....G.D.N.....L.....D.....DLLWEPRGYFDYWGQGLTVTVS
219IgM_F10   ---.E.....V.....G.D.N.....L.....D.....DLLWEPRGYFDYWGQGLTVTVS
219IgM_F12   ---.E.....V.....G.D.N.....L.....D.....DLLWEPRGYFDYWGQGLTVTVS
219IgM_C9    ---.E.....V.....G.D.N.....L.....D.....DLLWEPRGYFDYWGQGLTVTVS
219IgM_A6    ---.E.....V.....G.D.N.....L.....D.....DLLWEPRGYFDYWGQGLTVTVS
219IgM_A4    ---.E.....V.....G.D.N.....L.....D.....DLLWEPRGYFDYWGQGLTVTVS
219IgM_A5    ---.E.....V.....G.D.N.....L.....D.....DLLWEPRGYFDYWGQGLTVTVS
219IgM_A1    ---.E.....V.....G.D.N.....L.....D.....DLLWEPRGYFDYWGQGLTVTVS
219IgM_E7    ---.E.....V.....G.D.N.....L.....D.....DLLWEPRGYFDYWGQGLTVTVS
219IgM_E4    ---.E.....V.....G.D.N.....L.....D.....DLLWEPRGYFDYWGQGLTVTVS
219IgM_F4    ---.E.....V.....G.D.N.....L.....D.....DLLWEPRGYFDYWGQGLTVTVS
219IgM_C4    ---.E.....V.....G.D.N.....L.....D.....DLLWEPRGYFDYWGQGLTVTVS
219IgM_C5    ---.E.....V.....G.D.N.....L.....D.....DLLWEPRGYFDYWGQGLTVTVS
219IgM_C6    ---.E.....V.....G.D.N.....L.....D.....DLLWEPRGYFDYWGQGLTVTVS
219IgM_E1    ---.E.....V.....G.D.N.....L.....D.....DLLWEPRGYFDYWGQGLTVTVS
219IgM_E5    ---.E.....V.....G.D.N.....L.....D.....DLLWEPRGYFDYWGQGLTVTVS
219IgM_E8    ---.E.....V.....G.D.N.....L.....D.....DLLWEPRGYFDYWGQGLTVTVS
219IgM_E9    ---.E.....V.....G.D.N.....L.....D.....DLLWEPRGYFDYWGQGLTVTVS
219IgM_E12   ---.E.....V.....G.D.N.....L.....D.....DLLWEPRGYFDYWGQGLTVTVS
219IgM_E10   ---.E.....V.....G.D.N.....L.....D.....DLLWEPRGYFDYWGQGLTVTVS
219IgM_E11   ---.E.....V.....G.D.N.....L.....D.....DLLWEPRGYFDYWGQGLTVTVS
219IgM_B7    ---.E.....V.....G.D.N.....L.....D.....DLLWEPRGYFDYWGQGLTVTVS
219IgM_B6    ---.E.....V.....G.D.N.....L.....D.....DLLWEPRGYFDYWGQGLTVTVS
219IgM_B4    ---.E.....V.....G.D.N.....L.....D.....DLLWEPRGYFDYWGQGLTVTVS
219IgM_B3    ---.E.....V.....G.D.N.....L.....D.....DLLWEPRGYFDYWGQGLTVTVS
219IgM_B1    ---.E.....V.....G.D.N.....L.....D.....DLLWEPRGYFDYWGQGLTVTVS
219IgM_B9    ---.E.....V.....G.D.N.....L.....D.....DLLWEPRGYFDYWGQGLTVTVS
219IgM_B8    ---.E.....V.....G.D.N.....L.....D.....DLLWEPRGYFDYWGQGLTVTVS
219IgM_D6    ---.E.....V.....G.D.N.....L.....D.....DLLWEPRGYFDYWGQGLTVTVS
219IgM_D2    ---.E.....V.....G.D.N.....L.....D.....DLLWEPRGYFDYWGQGLTVTVS
219IgM_D8    ---.E.....V.....G.D.N.....L.....D.....DLLWEPRGYFDYWGQGLTVTVS
```

### IgM sequence alignment of group ID 13 continued

```
219IgM_G11 ---E.....V.....G.D..N.....L.....D.....DLLWEPRGYFDYWQGGTLVTVS
219IgM_G12 ---E.....V.....G.D..N.....L.....D.....DLLWEPRGYFDYWQGGTLVTVS
219IgM_F2 ---E.....V.....G.D..N.....L.....D.....DLLWEPRGYFDYWQGGTPTVTVS
219IgM_G4 ---E.....V.....G.D..N.....L.....D.....DLLWEPRGYFDYWQGGTLVTVS
219IgM_G3 ---E.....V.....G.D..N.....L.....D.....DLLWEPRGYFDYWQGGTLVTVS
219IgM_G5 ---E.....V.....G.D..N.....L.....D.....DLLWEPRGYFDYWQGGTLVTVS
219IgM_G6 ---E.....V.....G.D..N.....L.....D.....DLLWEPRGYFDYWQGGTLVTVS
219IgM_G7 ---E.....V.....G.D..N.....L.....D.....DLLWEPRGYFDYWQGGTLVTVS
219IgM_D5 ---E.....V.....G.D..N.....L.....D.....DLLWEPRGYFDYWQGGTLVTVS
219IgM_D7 ---E.....V.....G.D..N.....L.....D.....DLLWEPRGYFDYWQGGTLVTVS
219IgM_D12 ---E.....V.....G.D..N.....L.....D.....DLLWEPRGYFDYWQGGTLVTVS
219IgM_D11 ---E.....V.....G.D..N.....L.....D.....DLLWEPRGYFDYWQGGTLVTVS
219IgM_D10 ---E.....V.....G.D..N.....L.....D.....DLLWEPRGYFDYWQGGTLVTVS
219IgM_H7 ---E.....V.....G.D..N.....L.....D.....DLLWEPRGYFDYWQGGTLVTVS
219IgM_G8 ---E.....V.....G.D..N.....L.....D.....DLLWEPRGYFDYWQGGTLVTVS
```

### IgG sequence alignment of group ID 13

```
IGHV3-23*01 EVQLLESGGGLVQPGGSLRLSCAASGFTFSSYAMSWVRQAPGKLEWVSATISGSGGSTYYADSVKGRFTISRDN SKNTLYLQMNSLR AEDTAVYYCAK-----
219IgG_D6 ---E.....V.....G.D..N.....L.....D.....DLLWEPRGYFDYWQGGTLVTVS
219IgG_G10 ---E.....V.....G.D..N.....L.....D.....DLLWEPRGYFDYWQGGTLVTVS
219IgG_C9 ---E.....V.....G.D..N.....L.....D.....DLLWEPRGYFDYWQGGTLVTVS
219IgG_H5 ---E.....V.....G.D..N.....L.....D.....DLLWEPRGYFDYWQGGTLVTVS
219IgG_D7 ---E.....V.....G.D..N.....L.....D.....DLLWEPRGYFDYWQGGTLVTVS
219IgG_F10 ---E.....V.....G.D..N.....L.....D.....DLLWEPRGYFDYWQGGTLVTVS
219IgG_C5 ---E.....V.....G.D..N.....L.....D.....DLLWEPRGYFDYWQGGTLVTVS
219IgG_D11 ---EQ.....V.....G.D..N.....L.....D.....DLLWEPRGYFDYWQGGTLVTVS
219IgG_A3 ---E.....V..T.....G.D..N.....L.....D.....DLLWEPRGYFDYWQGGTLVTVS
219IgG_F5 ---E.....V..T.....G.D..N.....L.....D.....DLLWEPRGYFDYWQGGTLVTVS
219IgG_A5 ---E.....V..T.....G.D..N.....L.....D.....DLLWEPRGYFDYWQGGTLVTVS
219IgG_A7 ---E.....V..T.....G.D..N.....L.....D.....DLLWEPRGYFDYWQGGTLVTVS
219IgG_H8 ---E.....V..T.....G.D..N.....L.....D.....DLLWEPRGYFDYWQGGTLVTVS
219IgG_F12 ---E.....V..T.....G.D..N.....L.....D.....DLLWEPRGYFDYWQGGTLVTVS
219IgG_H10 ---E.....V..T.....G.D..N.....L.....D.....DLLWEPRGYFDYWQGGTLVTVS
219IgG_H12 ---E.....V..T.....G.D..N.....L.....D.....DLLWEPRGYFDYWQGGTLVTVS
219IgG_C3 ---E.....V..T.....G.D..N.....L.....D.....DLLWEPRGYFDYWQGGTLVTVS
219IgG_G2 ---E.....V..T.....G.D..N.....L.....D.....DLLWEPRGYFDYWQGGTLVTVS
219IgG_A10 ---EQ.....V..T.....G.D..N.....L.....D.....DLLWEPRGYFDYWQGGTLVTVS
219IgG_G3 ---E.....T.V.....G.D..DN.....L.....D.....DLLWEPRGYFDYWQGGTLVTVS
219IgG_B8 ---EQ.....T.V.....G.D..DN.....L.....D.....DLLWEPRGYFDYWQGGTLVTVS
```

### IgM sequence alignment of group ID 14

```
IGHV3-23*01 EVQLLESGGGLVQPGGSLRLSCAASGFTFSSYAMSWVRQAPGKLEWVSATISGSGGSTYYADSVKGRFTISRDN SKNTLYLQMNSLR AEDTAVYYCAK-----
219IgM_G10 ---E.....T.V.....G.D..DN.....L.....D.....DLLWEPRGYFDYWQGGTLVTVS
219IgM_A2 ---E.....T.V.....G.D..DN.....L.....D.....DLLWEPRGYFDYWQGGTLVTVS
219IgM_G9 ---E.....T.V.....G.D..DN.....L.....D.....DLLWEPRGYFDYWQGGTLVTVS
219IgM_C11 ---E.....T.V.....G.D..DN.....L.....D.....DLLWEPRGYFDYWQGGTLVTVS
```

### IgG sequence alignment of group ID 14

```
IGHV3-23*01 EVQLLESGGGLVQPGGSLRLSCAASGFTFSSYAMSWVRQAPGKLEWVSATISGSGGSTYYADSVKGRFTISRDN SKNTLYLQMNSLR AEDTAVYYCAK-----
219IgG_G3 ---E.....T.V.....G.D..DN.....L.....D.....DLLWEPRGYFDYWQGGTLVTVS
```

### IgM sequence alignment of group ID 15

```

IGHV3-23*01 EVQLLESGGGLVQPGGSLRLSCAASGFTFSYAMSWVRQAPGKLEWVSATISGSGGSTYYADSVKGRFTISRDNKNTLYLQMNSLRADTAVYYCAK-----
32Igm_A6 ---E.....YPWGETNGAFDIWGQGTMTVTS
32Igm_F10 ---E.....YPWGETNGAFDIWGQGTMTVTS
32Igm_B12 ---E.....YPWGETNGAFDIWGQGTMTVTS
32Igm_C11 ---E.....YPWGETNGAFDIWGQGTMTVTS
32Igm_D7 ---E.....YPWGETNGAFDIWGQGTMTVTS
32Igm_D4 ---E.....YPWGETNGAFDIWGQGTMTVTS
32Igm_C9 ---E.....YPWGETNGAFDIWGQGTMTVTS
32Igm_B7 ---E.....YPWGETNGAFDIWGQGTMTVTS
32Igm_G12 ---E.....YPWGETNGAFDIWGQGTMTVTS
32Igm_C2 ---E.....YPWGETNGAFDIWGQGTMTVTS
32Igm_C3 ---E.....YPWGETNGAFDIWGQGTMTVTS
32Igm_F3 ---E.....YPWGETNGAFDIWGQGTMTVTS
32Igm_E9 ---E.....YPWGETNGAFDIWGQGTMTVTS
32Igm_A1 ---E.....YPWGETNGAFDIWGQGTMTVTS
32Igm_A4 ---E.....YPWGETNGAFDIWGQGTMTVTS
32Igm_A5 ---E.....YPWGETNGAFDIWGQGTMTVTS
32Igm_E3 ---EQ.....YPWGETNGAFDIWGQGTMTVTS
32Igm_E8 ---EQ.....YPWGETNGAFDIWGQGTMTVTS
32Igm_B2 ---EQ.....YPWGETNGAFDIWGQGTMTVTS
32Igm_B5 ---EQ.....YPWGETNGAFDIWGQGTMTVTS
32Igm_B6 ---EQ.....YPWGETNGAFDIWGQGTMTVTS
32Igm_B8 ---EQ.....YPWGETNGAFDIWGQGTMTVTS
32Igm_H3 ---EQ.....YPWGETNGAFDIWGQGTMTVTS
32Igm_H2 ---EQ.....YPWGETNGAFDIWGQGTMTVTS
32Igm_H6 ---EQ.....YPWGETNGAFDIWGQGTMTVTS
32Igm_H5 ---EQ.....YPWGETNGAFDIWGQGTMTVTS
32Igm_H4 ---EQ.....YPWGETNGAFDIWGQGTMTVTS
32Igm_G11 ---EQ.....YPWGETNGAFDIWGQGTMTVTS
32Igm_H12 ---EQ.....YPWGETNGAFDIWGQGTMTVTS

```

IgM sequence alignment of group ID 15 continued

```

32Igm_C8 ---EQ.....YPWGETNGAFDIWGQGTMTVTS
32Igm_C7 ---EQ.....YPWGETNGAFDIWGQGTMTVTS
32Igm_A10 ---EQ.....YPWGETNGAFDIWGQGTMTVTS
32Igm_A11 ---EQ.....YPWGETNGAFDIWGQGTMTVTS
32Igm_A12 ---EQ.....YPWGETNGAFDIWGQGTMTVTS
32Igm_B11 ---EQ.....YPWGETNGAFDIWGQGTMTVTS
32Igm_E11 ---EQ.....YPWGETNGAFDIWGQGTMTVTS
32Igm_F8 ---EQ.....YPWGETNGAFDIWGQGTMTVTS
32Igm_F5 ---EQ.....YPWGETNGAFDIWGQGTMTVTS
32Igm_F4 ---EQ.....YPWGETNGAFDIWGQGTMTVTS
32Igm_F7 ---EQ.....YPWGETNGAFDIWGQGTMTVTS
32Igm_F6 ---EQ.....YPWGETNGAFDIWGQGTMTVTS
32Igm_F1 ---EQ.....YPWGETNGAFDIWGQGTMTVTS
32Igm_F2 ---EQ.....YPWGETNGAFDIWGQGTMTVTS
32Igm_A9 ---EQ.....YPWGETNGAFDIWGQGTMTVTS
32Igm_E2 ---EQ.....YPWGETNGAFDIWGQGTMTVTS
32Igm_A3 ---EQ.....YPWGETNGAFDIWGQGTMTVTS
32Igm_A7 ---EQ.....YPWGETNGAFDIWGQGTMTVTS
32Igm_F11 ---EQ.....YPWGETNGAFDIWGQGTMTVTS
32Igm_G2 ---EQ.....YPWGETNGAFDIWGQGTMTVTS
32Igm_G6 ---EQ.....YPWGETNGAFDIWGQGTMTVTS
32Igm_H11 ---EQ.....YPWGETNGAFDIWGQGTMTVTS
32Igm_F12 ---EQ.....YPWGETNGAFDIWGQGTMTVTS
32Igm_C10 ---EQ.....YPWGETNGAFDIWGQGTMTVTS
32Igm_D11 ---EQ.....YPWGETNGAFDIWGQGTMTVTS
32Igm_E4 ---EQ.....YPWGETNGAFDIWGQGTMTVTS
32Igm_C5 ---EQ.....YPWGETNGAFDIWGQGTMTVTS
32Igm_C6 ---EQ.....YPWGETNGAFDIWGQGTMTVTS
32Igm_D9 ---EQ.....YPWGETNGAFDIWGQGTMTVTS
32Igm_D1 ---EQ.....YPWGETNGAFDIWGQGTMTVTS
32Igm_D10 ---EQ.....YPWGETNGAFDIWGQGTMTVTS
32Igm_E7 ---EQ.....YPWGETNGAFDIWGQGTMTVTS
32Igm_G9 ---EQ.....YPWGETNGAFDIWGQGTMTVTS
32Igm_D5 ---EQ.....YPWGETNGAFDIWGQGTMTVTS
32Igm_A2 ---EQ.....YPWGETNGAFDIWGQGTMTVTS
32Igm_E1 ---EQ.....YPWGETNGAFDIWGQGTMTVTS
32Igm_H7 ---EQ.....YPWGETNGAFDIWGQGTMTVTS
32Igm_G4 ---EQ.....YPWGETNGAFDIWGQGTMTVTS
32Igm_G1 ---EQ.....YPWGETNGAFDIWGQGTMTVTS
32Igm_H8 ---EQ.....YPWGETNGAFDIWGQGTMTVTS
32Igm_A8 ---EQ.....YPWGETNGAFDIWGQGTMTVTS
32Igm_E10 ---EQ.....YPWGETNGAFDIWGQGTMTVTS
32Igm_B10 ---EQ.....YPWGETNGAFDIWGQGTMTVTS
32Igm_G10 ---EQ.....YPWGETNGAFDIWGQGTMTVTS
32Igm_H1 ---EQ.....YPWGETNGAFDIWGQGTMTVTS
32Igm_E6 ---EQ.....YPWGETNGAFDIWGQGTMTVTS
32Igm_D2 ---EQ.....YPWGETNGAFDIWGQGTMTVTS
32Igm_G7 ---EQ.....YPWGETNGAFDIWGQGTMTVTS
32Igm_C1 ---EQ.....YPWGETNGAFDIWGQGTMTVTS
32Igm_B4 ---EQ.....YPWGETNGAFDIWGQGTMTVTS
32Igm_E5 ---EQ.....YPWGETNGAFDIWGQGTMTVTS

```

IgG sequence alignment of group ID 15

```


```

```

IGHV3-23*01  EVQLLESGGGLVQPGGSLRLSCAASGFTFSSYAMSWVRQAPGKLEWVSALISGSGGTTYADSVKGRFTISRDNKNTLYLQMNSLRADDTAVYYCAK-----
32IgG_E1      ---.E.....Y.PWGETNGAFDIWGQGTMTVTS
32IgG_A8      ---.E.....Y.PWGETNGAFDIWGQGTMTVTS
32IgG_A9      ---.E.....Y.PWGETNGAFDIWGQGTMTVTS
32IgG_A6      ---.E.....Y.PWGETNGAFDIWGQGTMTVTS
32IgG_A5      ---.E.....Y.PWGETNGAFDIWGQGTMTVTS
32IgG_B9      ---.E.....Y.PWGETNGAFDIWGQGTMTVTS
32IgG_B8      ---.E.....Y.PWGETNGAFDIWGQGTMTVTS
32IgG_B3      ---.E.....Y.PWGETNGAFDIWGQGTMTVTS
32IgG_B5      ---.E.....Y.PWGETNGAFDIWGQGTMTVTS
32IgG_B4      ---.E.....Y.PWGETNGAFDIWGQGTMTVTS
32IgG_H9      ---.E.....Y.PWGETNGAFDIWGQGTMTVTS
32IgG_D12     ---.E.....Y.PWGETNGAFDIWGQGTMTVTS
32IgG_G5      ---.E.....Y.PWGETNGAFDIWGQGTMTVTS
32IgG_A11     ---.E.....Y.PWGETNGAFDIWGQGTMTVTS
32IgG_F6      ---.E.....Y.PWGETNGAFDIWGQGTMTVTS
32IgG_H1      ---.E.....Y.PWGETNGAFDIWGQGTMTVTS
32IgG_H5      ---.E.....Y.PWGETNGAFDIWGQGTMTVTS
32IgG_H7      ---.E.....Y.PWGETNGAFDIWGQGTMTVTS
32IgG_E10     ---.E.....Y.PWGETNGAFDIWGQGTMTVTS
32IgG_C9      ---.E.....Y.PWGETNGAFDIWGQGTMTVTS
32IgG_C1      ---.E.....Y.PWGETNGAFDIWGQGTMTVTS
32IgG_C7      ---.E.....Y.PWGETNGAFDIWGQGTMTVTS
32IgG_D4      ---.E.....Y.PWGETNGAFDIWGQGTMTVTS
32IgG_D6      ---.E.....Y.PWGETNGAFDIWGQGTMTVTS
32IgG_D3      ---.E.....Y.PWGETNGAFDIWGQGTMTVTS
32IgG_H12     ---.E.....Y.PWGETNGAFDIWGQGTMTVTS
32IgG_H11     ---.E.....Y.PWGETNGAFDIWGQGTMTVTS
32IgG_G11     ---.E.....Y.PWGETNGAFDIWGQGTMTVTS
32IgG_E9      ---.E.....Y.PWGETNGAFDIWGQGTMTVTS

```

### IgG sequence alignment of group ID 15 continued

```

241IgG_G11    ---.E.....Y.PWGETNGAFDIWGQGTMTVTS
241IgG_G10    ---.E.....Y.PWGETNGAFDIWGQGTMTVTS
241IgG_G12    ---.E.....Y.PWGETNGAFDIWGQGTMTVTS
241IgG_E8     ---.E.....Y.PWGETNGAFDIWGQGTMTVTS
241IgG_E4     ---.E.....Y.PWGETNGAFDIWGQGTMTVTS
241IgG_B1     ---.E.....Y.PWGETNGAFDIWGQGTMTVTS
241IgG_B2     ---.E.....Y.PWGETNGAFDIWGQGTMTVTS
241IgG_B3     ---.E.....Y.PWGETNGAFDIWGQGTMTVTS
241IgG_B4     ---.E.....Y.PWGETNGAFDIWGQGTMTVTS
241IgG_B8     ---.E.....Y.PWGETNGAFDIWGQGTMTVTS
241IgG_B9     ---.E.....Y.PWGETNGAFDIWGQGTMTVTS
241IgG_C10    ---.E.....Y.PWGETNGAFDIWGQGTMTVTS
241IgG_E11    ---.E.....Y.PWGETNGAFDIWGQGTMTVTS
241IgG_G9     ---.E.....Y.PWGETNGAFDIWGQGTMTVTS
241IgG_G6     ---.E.....Y.PWGETNGAFDIWGQGTMTVTS
241IgG_G5     ---.E.....Y.PWGETNGAFDIWGQGTMTVTS
241IgG_G2     ---.EQ.....Y.PWGETNGAFDIWGQGTMTVTS
241IgG_G3     ---.EQ.....Y.PWGETNGAFDIWGQGTMTVTS
241IgG_E12    ---.EQ.....Y.PWGETNGAFDIWGQGTMTVTS
241IgG_B7     ---.EQ.....Y.PWGETNGAFDIWGQGTMTVTS
241IgG_B12    ---.EQ.....Y.PWGETNGAFDIWGQGTMTVTS
32IgG_E2     ---.EQ.....Y.PWGETNGAFDIWGQGTMTVTS
32IgG_G12    ---.EQ.....Y.PWGETNGAFDIWGQGTMTVTS
32IgG_G10    ---.EQ.....Y.PWGETNGAFDIWGQGTMTVTS
32IgG_E11    ---.EQ.....Y.PWGETNGAFDIWGQGTMTVTS
32IgG_F10    ---.EQ.....Y.PWGETNGAFDIWGQGTMTVTS
32IgG_H10    ---.EQ.....Y.PWGETNGAFDIWGQGTMTVTS
32IgG_D1     ---.EQ.....Y.PWGETNGAFDIWGQGTMTVTS
32IgG_D7     ---.EQ.....Y.PWGETNGAFDIWGQGTMTVTS
32IgG_D9     ---.EQ.....Y.PWGETNGAFDIWGQGTMTVTS
32IgG_C6     ---.EQ.....Y.PWGETNGAFDIWGQGTMTVTS
32IgG_C3     ---.EQ.....Y.PWGETNGAFDIWGQGTMTVTS
32IgG_A7     ---.EQ.....Y.PWGETNGAFDIWGQGTMTVTS
32IgG_F8     ---.EQ.....Y.PWGETNGAFDIWGQGTMTVTS
32IgG_G9     ---.EQ.....Y.PWGETNGAFDIWGQGTMTVTS
32IgG_G8     ---.EQ.....Y.PWGETNGAFDIWGQGTMTVTS
32IgG_G1     ---.EQ.....Y.PWGETNGAFDIWGQGTMTVTS
32IgG_G6     ---.EQ.....Y.PWGETNGAFDIWGQGTMTVTS
32IgG_G4     ---.EQ.....Y.PWGETNGAFDIWGQGTMTVTS
32IgG_B1     ---.EQ.....Y.PWGETNGAFDIWGQGTMTVTS
32IgG_F1     ---.EQ.....Y.PWGETNGAFDIWGQGTMTVTS
32IgG_F5     ---.EQ.....Y.PWGETNGAFDIWGQGTMTVTS
32IgG_A1     ---.EQ.....Y.PWGETNGAFDIWGQGTMTVTS
32IgG_E4     ---.EQ.....Y.PWGETNGAFDIWGQGTMTVTS
32IgG_A4     ---.EQ.....Y.PWGETNGAFDIWGQGTMTVTS
32IgG_C8     ---.E.....Y.PWGETNGAFDIWGQGTMTVTS
32IgG_B11    ---.E.....V.....A.....Y.PWGETNGAFDIWGQGTMTVTS
32IgG_D2     ---.EQ.....Y.PWGETNGAFDIWGQGTMTVTS
32IgG_E3     ---.E.....V.....R.....G.....Y.PWGETNGAFDIWGQGTMTVTS
241IgG_E3     ---.E.....V.....R.....Y.PWGETNGAFDIWGQGTMTVTS
32IgG_B12    ---.E.....K...R...T.....Y.PWGETNGAFDIWGQGTMTVTS
241IgG_E9     ---.E.....K...R...T.....Y.PWGETNGAFDIWGQGTMTVTS
32IgG_H8     ---.E.....V.....G.....R.....Y.PWGETNGAFDIWGQGTMTVTS

```

### IgM sequence alignment of group ID 16

```
IGHV3-23*01 EVQLLESGGGLVQPGGSLRLSCAASGFTFSSYAMSWVRQAPGKLEWVSAISGSGGSTYYADSVKGRFTISRDNSKNTLYLQMNSLRAEDTAVYYCAK-----  
32IgM_C4 -----EQ-----FPWDTAMGPFDYWGQGLVTVS
```

### IgG sequence alignment of group ID 16

```
IGHV3-23*01 EVQLLESGGGLVQPGGSLRLSCAASGFTFSSYAMSWVRQAPGKLEWVSAISGSGGSTYYADSVKGRFTISRDNSKNTLYLQMNSLRAEDTAVYYCAK-----  
31IgG_H11 -----EQ-----FPWDTAMGPFDYWGQGLVTVS  
31IgG_E1 -----EQ-----FPWDTAMGPFDYWGQGLVTVS  
31IgG_E4 -----EQ-----FPWDTAMGPFDYWGQGLVTVS
```

---

The first 8 amino acids bracketed by green rectangle belong to the primer sequence. The chemical characteristics of the color-coded amino acids are: **HKR**, polar positive charge; **DE**, polar negative charge; **CNQST**, polar neutral; **AGILMPV**, non-polar neutral; **FWY**, nonpolar aromatic neutral.

**Table S14.** Property and prevalence of high-affinity germline anti-core clones in the intrahepatic IgM and IgG repertoire assessed by next generation sequencing (NGS)

| Property of germline anti-core antibody clones <sup>1</sup> |             |                | Prevalence of the specific clones in unselected IgM and IgG libraries revealed by NGS <sup>3</sup> |                                                 |                                                 |                                                 |                                               |                                                 |     |                                                 |     |                                               |
|-------------------------------------------------------------|-------------|----------------|----------------------------------------------------------------------------------------------------|-------------------------------------------------|-------------------------------------------------|-------------------------------------------------|-----------------------------------------------|-------------------------------------------------|-----|-------------------------------------------------|-----|-----------------------------------------------|
| Clone <sup>2</sup>                                          | Origin      | Gene Usage     | 31 <sup>4</sup>                                                                                    |                                                 | 241                                             |                                                 | 32                                            |                                                 | 219 |                                                 | 37  |                                               |
|                                                             |             |                | IgM                                                                                                | IgG                                             | IgM                                             | IgG                                             | IgM                                           | IgG                                             | IgM | IgG                                             | IgM | IgG                                           |
| <b>F10</b>                                                  | 241-IgM/IgG | V3-15,D5-18,J6 | 0                                                                                                  | 0                                               | 2.5x10 <sup>-4</sup><br>(1.9x10 <sup>-4</sup> ) | 1.1x10 <sup>-3</sup><br>(1.6x10 <sup>-3</sup> ) | 0                                             | 0                                               | 0   | 2.4x10 <sup>-6</sup><br>(7x10 <sup>-7</sup> )   | 0   | 0                                             |
| <b>G3</b>                                                   | 32-IgM/IgG  | V3-23,D3-16,J3 | 0                                                                                                  | 0                                               | 0                                               | 0                                               | 2.5x10 <sup>-5</sup><br>(4x10 <sup>-5</sup> ) | 1.9x10 <sup>-4</sup><br>(2.4x10 <sup>-4</sup> ) | 0   | 2.4x10 <sup>-6</sup><br>(5.3x10 <sup>-7</sup> ) | 0   | 5.5x10 <sup>-6</sup><br>(7x10 <sup>-6</sup> ) |
| <b>C7</b>                                                   | 219-IgG     | V3-49,D2-8,J5  | 0                                                                                                  | 0                                               | 0                                               | 0                                               | 0                                             | 0                                               | 0   | 1.5x10 <sup>-5</sup><br>(1.3x10 <sup>-5</sup> ) | 0   | 0                                             |
| <b>F4/B8</b>                                                | 31-IgG      | V3-23,D1-1,J3  | 2.4x10 <sup>-6</sup><br>(3.1x10 <sup>-6</sup> )                                                    | 1x10 <sup>-5</sup><br>(6.9x10 <sup>-6</sup> )   | 0                                               | 0                                               | 0                                             | 0                                               | 0   | 0                                               | 0   | 0                                             |
| <b>B7</b>                                                   | 31-IgM/IgG  | V1-18,D3-16,J4 | 7.3x10 <sup>-6</sup><br>(1.1x10 <sup>-5</sup> )                                                    | 5.2x10 <sup>-6</sup><br>(1.8x10 <sup>-6</sup> ) | 0                                               | 0                                               | 0                                             | 0                                               | 0   | 0                                               | 0   | 0                                             |

1. Antibody clones were identified by phage display library from the liver of ALF patients and panned against HBcAg.
2. Clones F4 and B8 were combined because they use the same genes with 0-2 mutations.
3. The prevalence of the high-affinity anti-core clones were assessed by two methods: (I) based on unique duplicate sequences as shown by numbers and (II) based on sequencing reads as shown by numbers in parentheses.
4. The IgM and IgG libraries were made from the liver of ALF-patient 31, 241, 32 and 219 as well as from a healthy liver donor 37 that was, negative for serologic markers of HBV infection.



**Table S15.** Number of somatic mutations within the variable heavy chain ( $V_H$ ) gene and binding affinity to hepatitis B core antigen (HBcAg) measured by surface plasmon resonance of selected Fabs recovered from the livers of patients with HBV-associated acute liver failure (ALF) and chimpanzees with acute hepatitis B

| Disease | Fab    | Origin      | No. of Mutations in $V_H$ Gene <sup>1</sup> | Gene Usage       | Reads | Binding Kinetics           |                                |                                                |            |
|---------|--------|-------------|---------------------------------------------|------------------|-------|----------------------------|--------------------------------|------------------------------------------------|------------|
|         |        |             |                                             |                  |       | HBcAg Antigen <sup>2</sup> | $k_{off}$ (sec <sup>-1</sup> ) | $k_{on}$ (nM <sup>-1</sup> sec <sup>-1</sup> ) | $K_d$ (nM) |
| HBV ALF | F10    | 241-IgM/IgG | 0                                           | V3-15,D5-18,J6   | 14/70 | 31                         | 2.30E-05                       | 8.55E-08                                       | 269        |
|         |        |             |                                             |                  |       | 32                         | 6.22E-03                       | 4.01E-04                                       | 15.5       |
|         |        |             |                                             |                  |       | 241                        | 1.76E-03                       | 2.46E-04                                       | 7.14       |
|         |        |             |                                             |                  |       | 219                        | 2.64E-02                       | 5.71E-04                                       | 46.2       |
|         | G3     | 32-IgM/IgG  | 0                                           | V3-23,D3-16,J3   | 3/59  | ayw                        | 9.44E-05                       | 4.56E-07                                       | 207        |
|         |        |             |                                             |                  |       | 31                         | 1.33E-05                       | 7.92E-05                                       | 0.168      |
|         |        |             |                                             |                  |       | 32                         | 2.60E-05                       | 1.06E-04                                       | 0.246      |
|         |        |             |                                             |                  |       | 241                        | 1.63E-04                       | 1.12E-04                                       | 1.45       |
|         | F4     | 31-IgG      | 0                                           | V3-23,D1-1,J3    | 11    | 219                        | 8.21E-05                       | 1.46E-04                                       | 0.562      |
|         |        |             |                                             |                  |       | ayw                        | 4.54E-05                       | 1.63E-04                                       | 0.278      |
|         |        |             |                                             |                  |       | 31                         | 1.87E-04                       | 1.40E-04                                       | 1.34       |
|         |        |             |                                             |                  |       | 32                         | 2.15E-03                       | 1.55E-04                                       | 13.9       |
|         | B7     | 31-IgM/IgG  | 0                                           | V1-18,D3-16,J4   | 18/7  | 241                        | 5.48E-03                       | 1.58E-04                                       | 34.6       |
|         |        |             |                                             |                  |       | 219                        | 1.41E-02                       | 2.01E-04                                       | 70.1       |
|         |        |             |                                             |                  |       | ayw                        | 1.40E-02                       | 2.46E-04                                       | 57         |
|         |        |             |                                             |                  |       | 31                         | 1.41E-04                       | 3.32E-05                                       | 4.25       |
|         | C7     | 219-IgG     | 0                                           | V3-49,D2-8,J5    | 23    | 32                         | 1.08E-04                       | 5.93E-06                                       | 18.2       |
|         |        |             |                                             |                  |       | 241                        | 3.17E-04                       | 1.07E-05                                       | 29.7       |
|         |        |             |                                             |                  |       | 219                        | 6.23E-05                       | 2.78E-05                                       | 2.24       |
|         |        |             |                                             |                  |       | ayw                        | 1.68E-05                       | 5.62E-05                                       | 0.299      |
|         | B8     | 31-IgG      | 2                                           | V3-23, D1-1, J3  | 3     | 31                         | 5.76E-05                       | 1.39E-04                                       | 0.415      |
|         |        |             |                                             |                  |       | 32                         | 5.23E-04                       | 1.97E-04                                       | 2.65       |
|         |        |             |                                             |                  |       | 241                        | 2.15E-05                       | 1.54E-04                                       | 0.14       |
|         |        |             |                                             |                  |       | 219                        | 2.60E-05                       | 1.86E-04                                       | 0.14       |
|         | B4     | 32-IgM      | 3                                           | V3-23, D3-16, J3 | 82    | ayw                        | 1.42E-05                       | 3.06E-04                                       | 0.0464     |
|         |        |             |                                             |                  |       | 31                         | 2.21E-04                       | 1.35E-04                                       | 1.64       |
|         |        |             |                                             |                  |       | 32                         | 1.19E-03                       | 1.10E-04                                       | 10.8       |
|         |        |             |                                             |                  |       | 241                        | 6.33E-03                       | 1.27E-04                                       | 49.7       |
|         | E3     | 219-IgG     | 8                                           | V3-23, D3-16, J4 | 5     | 219                        | 8.23E-03                       | 1.44E-04                                       | 57.3       |
|         |        |             |                                             |                  |       | ayw                        | 7.90E-03                       | 1.31E-04                                       | 60.2       |
|         |        |             |                                             |                  |       | 31                         | 1.10E-05                       | 1.04E-04                                       | 0.106      |
|         |        |             |                                             |                  |       | 32                         | 2.48E-05                       | 9.61E-05                                       | 0.258      |
|         | G10    | 219-IgG/IgM | 11                                          | V3-23, D6-13, J4 | 21/93 | 241                        | NB <sup>3</sup>                | NB                                             | NB         |
|         |        |             |                                             |                  |       | 219                        | 4.57E-05                       | 1.14E-04                                       | 0.402      |
|         |        |             |                                             |                  |       | ayw                        | 2.74E-05                       | 1.70E-04                                       | 0.161      |
|         |        |             |                                             |                  |       | 31                         | 2.05E-05                       | 1.60E-04                                       | 0.128      |
|         | D5     | 219-IgG     | 20                                          | V1-46, D5-18, J3 | 1     | 32                         | 6.47E-05                       | 1.07E-04                                       | 0.604      |
|         |        |             |                                             |                  |       | 241                        | 3.52E-05                       | 1.67E-04                                       | 0.211      |
|         |        |             |                                             |                  |       | 219                        | 2.05E-04                       | 1.74E-04                                       | 1.18       |
|         |        |             |                                             |                  |       | ayw                        | 1.36E-04                       | 2.20E-04                                       | 0.619      |
|         | C2     | 31-IgG      | 27                                          | V3-23, D3-22, J4 | 6     | 31                         | 9.19E-04                       | 2.87E-04                                       | 3.2        |
|         |        |             |                                             |                  |       | 32                         | 1.04E-03                       | 6.80E-04                                       | 1.53       |
|         |        |             |                                             |                  |       | 241                        | 3.16E-03                       | 2.59E-04                                       | 12.2       |
|         |        |             |                                             |                  |       | 219                        | 3.38E-03                       | 4.36E-04                                       | 7.75       |
|         | D5     | 219-IgG     | 20                                          | V1-46, D5-18, J3 | 1     | ayw                        | 1.89E-03                       | 4.18E-06                                       | 452        |
|         |        |             |                                             |                  |       | 31                         | 4.39E-05                       | 1.87E-07                                       | 235        |
|         |        |             |                                             |                  |       | 32                         | 1.13E-03                       | 3.91E-05                                       | 28.9       |
|         |        |             |                                             |                  |       | 241                        | 9.71E-05                       | 2.09E-07                                       | 465        |
| C2      | 31-IgG | 27          | V3-23, D3-22, J4                            | 6                | 219   | 3.65E-04                   | 4.24E-05                       | 8.6                                            |            |
|         |        |             |                                             |                  | ayw   | 3.11E-04                   | 2.21E-05                       | 14.1                                           |            |
|         |        |             |                                             |                  | 31    | 5.07E-03                   | 1.88E-04                       | 26.9                                           |            |
|         |        |             |                                             |                  | 32    | NB                         | NB                             | NB                                             |            |
| C2      | 31-IgG | 27          | V3-23, D3-22, J4                            | 6                | 241   | 1.78E-02                   | 1.78E-04                       | 100                                            |            |
|         |        |             |                                             |                  | 219   | NB                         | NB                             | NB                                             |            |
|         |        |             |                                             |                  | ayw   | NB                         | NB                             | NB                                             |            |
|         |        |             |                                             |                  | 31    | 5.07E-03                   | 1.88E-04                       | 26.9                                           |            |

|                                  |            |                |    |                    |    |          |                 |          |                    |
|----------------------------------|------------|----------------|----|--------------------|----|----------|-----------------|----------|--------------------|
| <b>Acute<br/>Hepatitis<br/>B</b> | <b>D10</b> | CH1627-<br>IgG | 6  | V6-1,D6-<br>19,J3  | 69 | 31       | NB <sup>3</sup> | NB       | NB                 |
|                                  |            |                |    |                    |    | 32       | 5.42E-04        | 1.99E-06 | 273                |
|                                  |            |                |    |                    |    | 241      | NB              | NB       | NB                 |
|                                  |            |                |    |                    |    | 219      | NB              | NB       | NB                 |
|                                  |            |                |    |                    |    | ayw      | 6.01E-3         | 4.89E-04 | 12.3               |
|                                  | <b>F8</b>  | CH1627-<br>IgG | 19 | V3-74,D2-<br>2,J4  | 14 | 31       | 9.80E-4         | 1.55E-06 | 631                |
|                                  |            |                |    |                    |    | 32       | 3.91E-03        | 4.36E-04 | 8.97               |
|                                  |            |                |    |                    |    | 241      | NB              | NB       | NB                 |
|                                  |            |                |    |                    |    | 219      | 4.46E-04        | 3.35E-04 | 1.33               |
|                                  |            |                |    |                    |    | ayw      | 2.08E-3         | 3.85E-4  | 5.40               |
|                                  | <b>A1</b>  | CH5835-<br>IgG | 11 | V3-74,D4-<br>11,J4 | 12 | 31       | NB              | NB       | NB                 |
|                                  |            |                |    |                    |    | 32       | 1.08E-01        | 1.31E-04 | 822                |
|                                  |            |                |    |                    |    | 241      | NB              | NB       | NB                 |
|                                  |            |                |    |                    |    | 219      | >1.00E-01       | NB       | 25.91 <sup>4</sup> |
|                                  |            |                |    |                    |    | ayw      | 5.31E-04        | 1.21E-03 | 0.439              |
|                                  | <b>B9</b>  | CH5835-<br>IgG | 9  | V3-74,D5-<br>12,J4 | 41 | 31       | NB              | NB       | NB                 |
| 32                               |            |                |    |                    |    | 1.52E-01 | 1.79E-04        | 847      |                    |
| 241                              |            |                |    |                    |    | NB       | NB              | NB       |                    |
| 219                              |            |                |    |                    |    | 1.45E-04 | 2.11E-07        | 687      |                    |
| ayw                              |            |                |    |                    |    | 4.43E-04 | 1.00E-03        | 0.443    |                    |

1. Number of nucleotide substitutions in VH gene.
2. Hepatitis B core protein was derived from patient 31, 32, 241 and 219 with ALF or wild-type HBV (ayw) (8)
3. No binding detectable
4.  $K_d$  was determined by isotherm analysis using steady-state signal as a function of analyte concentration.
